# Supplementary material for: Photocatalytic C(sp2)–OMe bond cleavage and amidation of anisoles with N-hydroxyphthalimides and phthalimides
Source: Royal Society of Chemistry journal article supplement (doi:10.1039/d3qo00861d), 2023-01-01

**Electronic Supporting Information for**

**Photocatalytic C(sp<sup>2</sup>)-OMe Bond Cleavage and Amidation of Anisoles with *N*-Hydroxyphthalimides and Phthalimides**

Zhentao Pan,<sup>a</sup> Maier Wu,<sup>a</sup> Jingxi Fang,<sup>a</sup> Aiguo Zhong,<sup>a</sup> Huajiang Jiang,<sup>a</sup> Guan Wang,<sup>b</sup> Jingjing Guo<sup>b</sup> and Yongmin Ma<sup>\*a</sup>

<sup>a</sup>Institute of Advanced Studies and School of Pharmaceutical and Chemical Engineering, Taizhou University, Jiaojiang 318000, P. R. China.

<sup>b</sup>School of Medicine and Pharmaceutical Engineering, Taizhou Vocational and Technical College, Taizhou 318000, P. R. China.

\*Corresponding author: [yongmin.ma@tzc.edu.cn](mailto:yongmin.ma@tzc.edu.cn)

**Table of Contents**

|                                                  |                |
|--------------------------------------------------|----------------|
| <b>1) General information.....</b>               | <b>S2</b>      |
| <b>2) Experimental section.....</b>              | <b>S2</b>      |
| <b>3) Photochemical setup.....</b>               | <b>S3</b>      |
| <b>4) HRMS analysis .....</b>                    | <b>S3</b>      |
| <b>5) Natural population analysis .....</b>      | <b>S4-S7</b>   |
| <b>6) Characterization data of products.....</b> | <b>S7-S20</b>  |
| <b>7) References .....</b>                       | <b>S20-S21</b> |
| <b>8) NMR spectra of products .....</b>          | <b>S22-S65</b> |

## 1. General information.

All visible light-induced reactions were conducted in borosilicate glass tubes with Teflon-coated magnetic stirring bars and placed 5 cm from two commercial blue LEDs (manufacturer: Qin Tao trading co., model: SSG11701, 18 W,  $\lambda = 460\text{--}462$  nm, URL: <https://item.taobao.com/item.htm?spm=a230r.1.14.8.78777564LdOJDG&id=638346217581&ns=1&abbucket=13#detail>) with a fan placed upside for cooling (Figure S1). All starting materials and reagents were purchased from commercial sources and used as received unless otherwise noted. Reactions were monitored using thin-layer chromatography (TLC) on commercial silica gel plates. Visualization of the developed plates was performed under UV light (254 nm). NMR spectra data were obtained on Avance (III) HD 400 MHz instruments.  $^1\text{H}$  NMR and  $^{13}\text{C}$  NMR spectra were referenced to residual protic solvent peaks or TMS signal (0 ppm).  $^{19}\text{F}$  NMR chemical shifts were externally referenced to  $\text{CCl}_3\text{F}$  (0 ppm). Data for  $^1\text{H}$  NMR are recorded as follows: chemical shift ( $\delta$ , ppm), multiplicity (s = singlet, d = doublet, t = triplet, m = multiplet or unresolved, br = broad singlet, coupling constant (s) in Hz, integration). Data for  $^{13}\text{C}$  and  $^{19}\text{F}$  NMR are reported in terms of chemical shift ( $\delta$ , ppm). HRMS Spectra were obtained with Waters Q-TOF Premier (ESI, positive mode) spectrometers.

## 2. Experimental section

### 2.1 General experimental procedure for amidation of anisoles with *N*-hydroxyphthalimides.

To a 10 mL Schlenk tube equipped with a magnetic stir bar was added *N*-hydroxyphthalimides (**2**) (0.2 mmol), 4CzIPN (7.9 mg, 0.01 mmol),  $\text{PPh}_3$  (78.6 mg, 0.3 mmol) and  $\text{NaHCO}_3$  (25.2 mg, 0.3 mmol) and the tube was evacuated and backfilled with  $\text{N}_2$  (three times). After addition of *tert*-butylmethylether (1.0 mL, 0.2 M) and anisole (**1**) (2 mmol) by syringe under  $\text{N}_2$ , the mixture was placed on a stir-plate. Two 18 W 460–462 nm blue LEDs were placed on opposite sides of the vial at approximately 5 cm distance. The reaction mixture was stirred at rt for 22 h. After completion, the reaction mixture was concentrated in vacuo and the residue was purified by flash column chromatography to afford the products **3**.

### 2.2 General experimental procedure for amidation of anisoles with phthalimides.

To a 10 mL Schlenk tube equipped with a magnetic stir bar was added phthalimides (**4**) (0.2 mmol), 4CzIPN (7.9 mg, 0.01 mmol) and  $\text{Cs}_2\text{CO}_3$  (97.8 mg, 0.3 mmol) and the tube was evacuated and backfilled with  $\text{N}_2$  (three times). After addition of dichloromethane (1.0 mL, 0.2 M) and anisole (**1**) (2 mmol) by syringe under  $\text{N}_2$ , the mixture was placed on a stir-plate. Two 18 W 460–462 nm blue LEDs were placed on opposite sides of the vial at approximately 5 cm distance. The reaction mixture was stirred at rt for 22 h. After completion, the reaction mixture was concentrated in vacuo and the residue was purified by flash column chromatography to afford the products **3**.

### 3. Photochemical setup

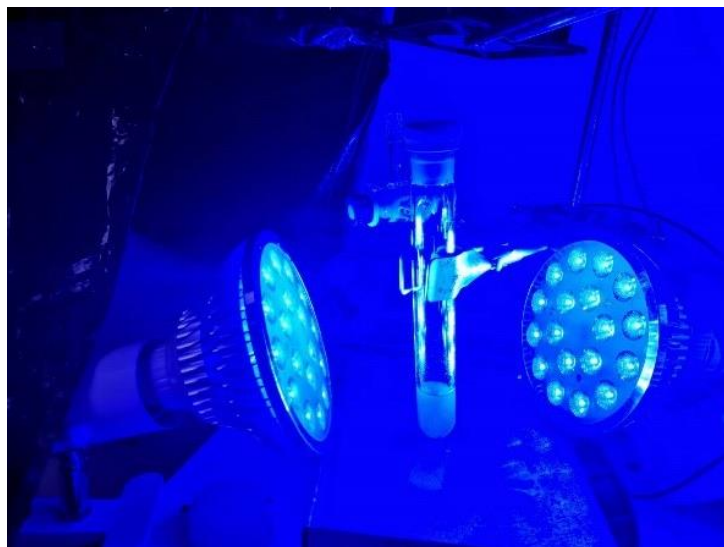

(A fan on the top of tube to make sure the reaction temperature is rt)

**Figure S1** General reaction setup

### 4. HRMS analysis (radical trapping experiment with TEMPO)

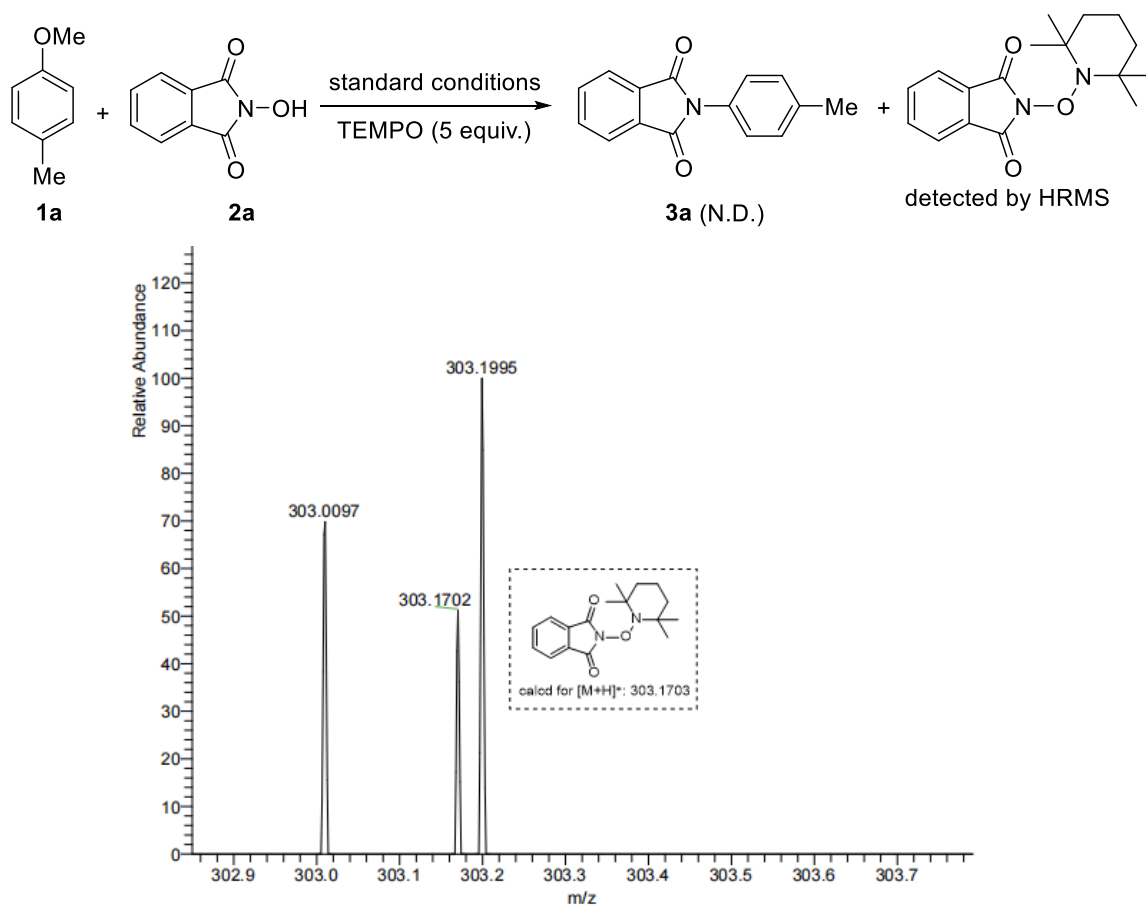

**Figure S2** The result of HRMS analysis

## 5. Natural population analysis

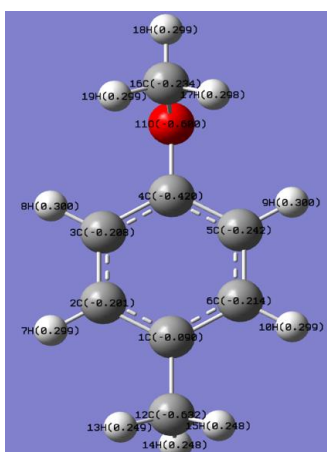

**1a**

Summary of Natural Population Analysis of **1a**:

### Natural Population

| Atom | No | Natural Charge | Core    | Valence | Rydberg | Total   |
|------|----|----------------|---------|---------|---------|---------|
| C    | 1  | -0.08989       | 1.99897 | 4.03192 | 0.01557 | 6.04645 |
| C    | 2  | -0.20069       | 1.99891 | 4.20519 | 0.01557 | 6.21967 |
| C    | 3  | -0.20773       | 1.99887 | 4.23104 | 0.01782 | 6.24773 |
| C    | 4  | -0.42009       | 1.99859 | 3.68500 | 0.02626 | 5.70985 |
| C    | 5  | -0.24161       | 1.99887 | 4.23104 | 0.01782 | 6.24773 |
| C    | 6  | -0.21422       | 1.99891 | 4.20519 | 0.01557 | 6.21967 |
| H    | 7  | 0.29901        | 0.00000 | 0.76934 | 0.00421 | 0.77355 |
| H    | 8  | 0.29991        | 0.00000 | 0.76078 | 0.00539 | 0.76617 |
| H    | 9  | 0.29971        | 0.00000 | 0.76078 | 0.00539 | 0.76617 |
| H    | 10 | 0.29945        | 0.00000 | 0.76934 | 0.00421 | 0.77355 |
| O    | 11 | -0.59957       | 1.99976 | 6.57064 | 0.02917 | 8.59957 |
| C    | 12 | -0.63156       | 1.99933 | 4.62243 | 0.00979 | 6.63156 |
| H    | 13 | 0.24891        | 0.00000 | 0.77420 | 0.00289 | 0.77709 |
| H    | 14 | 0.24809        | 0.00000 | 0.76896 | 0.00265 | 0.77161 |

|   |    |          |         |         |         |         |
|---|----|----------|---------|---------|---------|---------|
| H | 15 | 0.24814  | 0.00000 | 0.77420 | 0.00289 | 0.77709 |
| C | 16 | -0.23388 | 1.99928 | 4.22159 | 0.01300 | 6.23388 |
| H | 17 | 0.29810  | 0.00000 | 0.81609 | 0.00312 | 0.81922 |
| H | 18 | 0.29902  | 0.00000 | 0.79825 | 0.00197 | 0.80022 |
| H | 19 | 0.29902  | 0.00000 | 0.81609 | 0.00312 | 0.81922 |

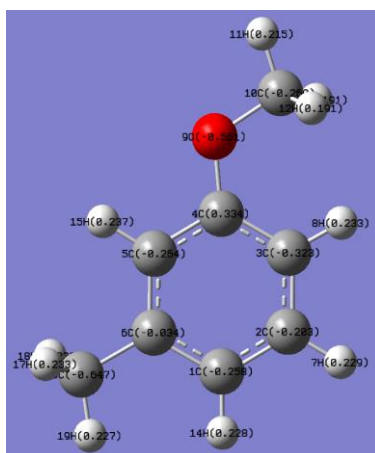

**1n**

Summary of Natural Population Analysis of **1n**:

Natural Population

| Atom | No | Natural Charge | Core    | Valence | Rydberg | Total   |
|------|----|----------------|---------|---------|---------|---------|
| C    | 1  | -0.25762       | 1.99889 | 4.24277 | 0.01597 | 6.25762 |
| C    | 2  | -0.20335       | 1.99902 | 4.18680 | 0.01754 | 6.20335 |
| C    | 3  | -0.32336       | 1.99888 | 4.30911 | 0.01537 | 6.32336 |
| C    | 4  | 0.33403        | 1.99868 | 3.64246 | 0.02484 | 5.66597 |
| C    | 5  | -0.26421       | 1.99880 | 4.24741 | 0.01801 | 6.26421 |
| C    | 6  | -0.03356       | 1.99895 | 4.01899 | 0.01562 | 6.03356 |
| H    | 7  | 0.22892        | 0.00000 | 0.76699 | 0.00409 | 0.77108 |
| H    | 8  | 0.23305        | 0.00000 | 0.76176 | 0.00518 | 0.76695 |
| O    | 9  | -0.56114       | 1.99971 | 6.53314 | 0.02828 | 8.56114 |

|   |    |          |         |         |         |         |
|---|----|----------|---------|---------|---------|---------|
| C | 10 | -0.25959 | 1.99934 | 4.24743 | 0.01282 | 6.25959 |
| H | 11 | 0.21456  | 0.00000 | 0.78314 | 0.00230 | 0.78544 |
| H | 12 | 0.19066  | 0.00000 | 0.80583 | 0.00351 | 0.80934 |
| H | 13 | 0.19065  | 0.00000 | 0.80583 | 0.00351 | 0.80935 |
| H | 14 | 0.22756  | 0.00000 | 0.76812 | 0.00433 | 0.77244 |
| H | 15 | 0.23670  | 0.00000 | 0.75877 | 0.00453 | 0.76330 |
| C | 16 | -0.64664 | 1.99931 | 4.63684 | 0.01049 | 6.64664 |
| H | 17 | 0.23318  | 0.00000 | 0.76405 | 0.00276 | 0.76682 |
| H | 18 | 0.23318  | 0.00000 | 0.76406 | 0.00276 | 0.76682 |
| H | 19 | 0.22699  | 0.00000 | 0.77014 | 0.00287 | 0.77301 |

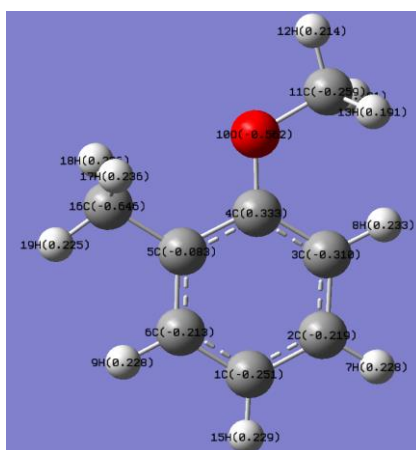

**1o**

Summary of Natural Population Analysis of **1o**:

Natural Population

| Atom | No | Natural Charge | Core    | Valence | Rydberg | Total   |
|------|----|----------------|---------|---------|---------|---------|
| C    | 1  | -0.25144       | 1.99898 | 4.23533 | 0.01713 | 6.25144 |
| C    | 2  | -0.21857       | 1.99901 | 4.20251 | 0.01706 | 6.21857 |
| C    | 3  | -0.31044       | 1.99890 | 4.29571 | 0.01584 | 6.31044 |
| C    | 4  | 0.33251        | 1.99859 | 3.64491 | 0.02399 | 5.66749 |

|   |    |          |         |         |         |         |
|---|----|----------|---------|---------|---------|---------|
| C | 5  | -0.08329 | 1.99886 | 4.06628 | 0.01816 | 6.08329 |
| C | 6  | -0.21347 | 1.99891 | 4.19864 | 0.01592 | 6.21347 |
| H | 7  | 0.22848  | 0.00000 | 0.76738 | 0.00414 | 0.77152 |
| H | 8  | 0.23286  | 0.00000 | 0.76208 | 0.00506 | 0.76714 |
| H | 9  | 0.22789  | 0.00000 | 0.76792 | 0.00419 | 0.77211 |
| O | 10 | -0.56158 | 1.99971 | 6.53510 | 0.02677 | 8.56158 |
| C | 11 | -0.25925 | 1.99934 | 4.24693 | 0.01298 | 6.25925 |
| H | 12 | 0.21443  | 0.00000 | 0.78321 | 0.00236 | 0.78557 |
| H | 13 | 0.19106  | 0.00000 | 0.80538 | 0.00356 | 0.80894 |
| H | 14 | 0.19106  | 0.00000 | 0.80538 | 0.00356 | 0.80894 |
| H | 15 | 0.22908  | 0.00000 | 0.76655 | 0.00437 | 0.77092 |
| C | 16 | -0.64557 | 1.99932 | 4.63509 | 0.01117 | 6.64557 |
| H | 17 | 0.23562  | 0.00000 | 0.76073 | 0.00365 | 0.76438 |
| H | 18 | 0.23561  | 0.00000 | 0.76074 | 0.00365 | 0.76439 |
| H | 19 | 0.22503  | 0.00000 | 0.77221 | 0.00276 | 0.77497 |

## 6. Characterization data of products

### 2-(*p*-Tolyl)isoindoline-1,3-dione (3a)

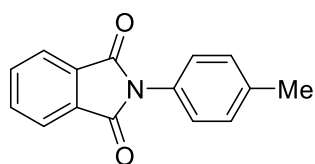

**3a**

EtOAc/*n*-Hexane = 1/8 (eluent); white solid, 77% yield, 36.5 mg; <sup>1</sup>H NMR (400 MHz, CDCl<sub>3</sub>) δ 7.97 – 7.94 (m, 2H), 7.80 – 7.78 (m, 2H), 7.35 – 7.28 (m, 4H), 2.41 (s, 3H); <sup>13</sup>C NMR (100 MHz, CDCl<sub>3</sub>) δ 167.5, 138.3, 134.4, 131.8, 129.8, 128.9, 126.5, 123.8, 21.3. The spectral data are consistent with those reported in the literature.<sup>[1]</sup>

### 2-(4-Ethylphenyl)isoindoline-1,3-dione (3b)

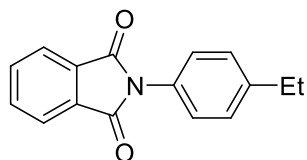

**3b**

EtOAc/*n*-Hexane = 1/8 (eluent); white solid, 79% yield, 39.7 mg;  $^1\text{H}$  NMR (400 MHz,  $\text{CDCl}_3$ )  $\delta$  7.97 – 7.95 (m, 2H), 7.83 – 7.75 (m, 2H), 7.34 (s, 4H), 2.71 (q,  $J = 7.6$  Hz, 2H), 1.28 (t,  $J = 7.6$  Hz, 3H);  $^{13}\text{C}$  NMR (100 MHz,  $\text{CDCl}_3$ )  $\delta$  167.5, 144.5, 134.4, 131.8, 129.1, 128.7, 126.5, 123.8, 28.6, 15.5. The spectral data are consistent with those reported in the literature.<sup>[1]</sup>

### 2-(4-Propylphenyl)isoindoline-1,3-dione (3c)

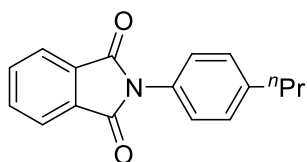

**3c**

EtOAc/*n*-Hexane = 1/8 (eluent); white solid, 74% yield, 39.2 mg;  $^1\text{H}$  NMR (400 MHz,  $\text{CDCl}_3$ )  $\delta$  7.97 – 7.95 (m, 2H), 7.80 – 7.78 (m, 2H), 7.36 – 7.30 (m, 4H), 2.72 – 2.56 (m, 2H), 1.74 – 1.63 (m, 2H), 0.98 (t,  $J = 7.3$  Hz, 3H);  $^{13}\text{C}$  NMR (100 MHz,  $\text{CDCl}_3$ )  $\delta$  167.5, 142.9, 134.4, 131.8, 129.2, 129.1, 126.4, 123.8, 37.8, 24.5, 13.9. The spectral data are consistent with those reported in the literature.<sup>[2]</sup>

### 2-(4-Isopropylphenyl)isoindoline-1,3-dione (3d)

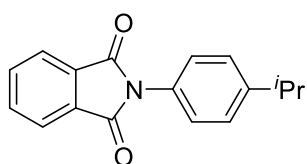

**3d**

EtOAc/*n*-Hexane = 1/8 (eluent); white solid, 69% yield, 36.6 mg;  $^1\text{H}$  NMR (400 MHz,  $\text{CDCl}_3$ )  $\delta$  7.97 – 7.95 (m, 2H), 7.80 – 7.78 (m, 2H), 7.41 – 7.30 (m, 4H), 2.97 (dt,  $J = 14.0, 6.8$  Hz, 1H), 1.29 (d,  $J = 6.8$  Hz, 6H);  $^{13}\text{C}$  NMR (100 MHz,  $\text{CDCl}_3$ )  $\delta$  167.5, 148.9, 134.4, 131.8, 129.2, 127.3, 126.5, 123.7, 33.9, 23.9. The spectral data are consistent with those reported in the literature.<sup>[1]</sup>

### 2-(4-*tert*-Butylphenyl)isoindoline-1,3-dione (3e)



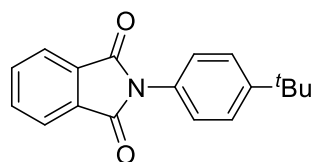

**3e**

EtOAc/*n*-Hexane = 1/8 (eluent); white solid, 67% yield, 37.4 mg;  $^1\text{H NMR}$  (400 MHz,  $\text{CDCl}_3$ )  $\delta$  7.97 – 7.95 (m, 2H), 7.81 – 7.79 (m, 2H), 7.53 (d,  $J = 8.2$  Hz, 2H), 7.36 (d,  $J = 8.2$  Hz, 2H), 1.36 (s, 9H);  $^{13}\text{C NMR}$  (100 MHz,  $\text{CDCl}_3$ )  $\delta$  167.5, 151.2, 134.4, 131.8, 128.9, 126.2, 126.1, 123.8, 34.8, 31.3. The spectral data are consistent with those reported in the literature.<sup>[1]</sup>

### 2-(4-Methoxyphenyl)isoindoline-1,3-dione (3f)

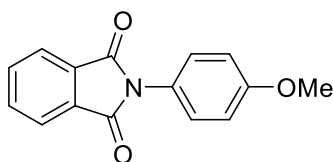

**3f**

EtOAc/*n*-Hexane = 1/5 (eluent); white solid, 84% yield, 42.5 mg;  $^1\text{H NMR}$  (400 MHz,  $\text{CDCl}_3$ )  $\delta$  7.96 – 7.94 (m, 2H), 7.81 – 7.77 (m, 2H), 7.37 – 7.30 (m, 2H), 7.08 – 6.98 (m, 2H), 3.85 (s, 3H);  $^{13}\text{C NMR}$  (100 MHz,  $\text{CDCl}_3$ )  $\delta$  167.6, 159.3, 134.3, 131.8, 128.0, 124.3, 123.7, 114.5, 55.5. The spectral data are consistent with those reported in the literature.<sup>[1]</sup>

### 2-(4-Butoxyphenyl)isoindoline-1,3-dione (3g)

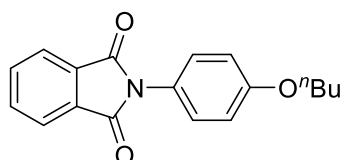

**3g**

EtOAc/*n*-Hexane = 1/5 (eluent); white solid, 84% yield, 42.5 mg;  $^1\text{H NMR}$  (400 MHz,  $\text{CDCl}_3$ )  $\delta$  7.96 – 7.94 (m, 2H), 7.81 – 7.77 (m, 2H), 7.37 – 7.30 (m, 2H), 7.08 – 6.98 (m, 2H), 3.85 (s, 3H);  $^{13}\text{C NMR}$  (100 MHz,  $\text{CDCl}_3$ )  $\delta$  167.6, 158.8, 134.2, 131.8, 127.8, 123.9, 123.6, 114.9, 67.9, 31.2, 19.2, 13.8. The spectral data are consistent with those reported in the literature.<sup>[3]</sup>

### 2-(4-(Benzyloxy)phenyl)isoindoline-1,3-dione (3h)

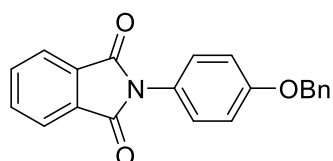

### 3h

EtOAc/*n*-Hexane = 1/5 (eluent); white solid, 84% yield, 42.5 mg;  $^1\text{H}$  NMR (400 MHz,  $\text{CDCl}_3$ )  $\delta$  7.94 (m, 2H), 7.79 (m, 2H), 7.50 – 7.37 (m, 2H), 7.34 (d,  $J = 8.4$  Hz, 4H), 7.09 (d,  $J = 8.8$  Hz, 3H), 5.11 (s, 2H);  $^{13}\text{C}$  NMR (100 MHz,  $\text{CDCl}_3$ )  $\delta$  167.6, 158.5, 136.7, 134.3, 131.8, 128.7, 128.1, 128.0, 127.5, 124.5, 123.7, 115.4, 70.3. The spectral data are consistent with those reported in the literature.<sup>[4]</sup>

### 2-(4-(Trifluoromethoxy)phenyl)isoindoline-1,3-dione (3i)

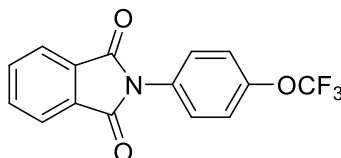

3i

EtOAc/*n*-Hexane = 1/5 (eluent); white solid, 81% yield, 49.7 mg;  $^1\text{H}$  NMR (400 MHz,  $\text{CDCl}_3$ )  $\delta$  8.00 – 7.95 (m, 2H), 7.84 – 7.80 (m, 2H), 7.55 – 7.47 (m, 2H), 7.36 (d,  $J = 8.5$  Hz, 2H);  $^{13}\text{C}$  NMR (100 MHz,  $\text{CDCl}_3$ )  $\delta$  167.0, 148.4, 134.7, 131.6, 130.2, 127.9, 123.9, 121.7, 120.4 (q,  $J = 256$  Hz);  $^{19}\text{F}$  NMR (376 MHz,  $\text{CDCl}_3$ )  $\delta$  -57.85. The spectral data are consistent with those reported in the literature.<sup>[1]</sup>

### 4-(1,3-Dioxoisoindolin-2-yl)phenyl trifluoromethanesulfonate (3j)

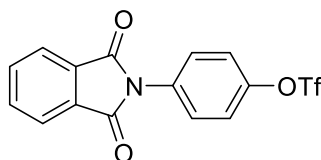

3j

EtOAc/*n*-Hexane = 1/5 (eluent); white solid, 81% yield, 49.7 mg;  $^1\text{H}$  NMR (400 MHz,  $\text{CDCl}_3$ )  $\delta$  7.99 (m, 2H), 7.83 (m, 2H), 7.62 (d,  $J = 8.8$  Hz, 2H), 7.43 (d,  $J = 8.8$  Hz, 2H);  $^{13}\text{C}$  NMR (100 MHz,  $\text{CDCl}_3$ )  $\delta$  166.8, 148.3, 134.8, 131.8, 131.5, 128.0, 124.0, 122.1, 119.1 (q,  $J = 307$  Hz);  $^{19}\text{F}$  NMR (376 MHz,  $\text{CDCl}_3$ )  $\delta$  -72.67. The spectral data are consistent with those reported in the literature.<sup>[5]</sup>

### 2-(4-Fluorophenyl)isoindoline-1,3-dione (3k)

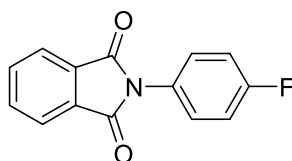

3k

EtOAc/*n*-Hexane = 1/8 (eluent); white solid, 35% yield, 16.9 mg;  $^1\text{H NMR}$  (400 MHz,  $\text{CDCl}_3$ )  $\delta$  7.97 – 7.95 (m, 2H), 7.82 – 7.80 (m, 2H), 7.49 – 7.37 (m, 2H), 7.23 – 7.18 (m, 2H);  $^{13}\text{C NMR}$  (100 MHz,  $\text{CDCl}_3$ )  $\delta$  167.2, 161.9 (d,  $J = 246$  Hz), 134.5, 131.6, 128.4 (d,  $J = 8$  Hz), 127.5 (d,  $J = 3$  Hz), 123.8, 116.2 (d,  $J = 23$  Hz);  $^{19}\text{F NMR}$  (376 MHz,  $\text{CDCl}_3$ )  $\delta$  -113.01. The spectral data are consistent with those reported in the literature.<sup>[1]</sup>

### 2-(4-Chlorophenyl)isoindoline-1,3-dione (3l)

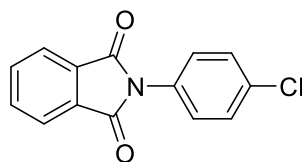

3l

EtOAc/*n*-Hexane = 1/8 (eluent); white solid, 52% yield, 26.7 mg;  $^1\text{H NMR}$  (400 MHz,  $\text{CDCl}_3$ )  $\delta$  7.98 – 7.94 (m, 2H), 7.83 – 7.79 (m, 2H), 7.51 – 7.45 (m, 2H), 7.44 – 7.37 (m, 2H);  $^{13}\text{C NMR}$  (100 MHz,  $\text{CDCl}_3$ )  $\delta$  166.9, 134.5, 133.7, 131.5, 130.1, 129.3, 127.6, 123.8. The spectral data are consistent with those reported in the literature.<sup>[1]</sup>

### 2-(4-Bromophenyl)isoindoline-1,3-dione (3m)

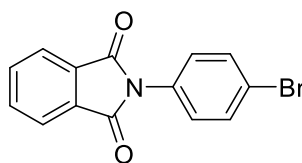

3m

EtOAc/*n*-Hexane = 1/8 (eluent); white solid, 58% yield, 34.9 mg;  $^1\text{H NMR}$  (400 MHz,  $\text{CDCl}_3$ )  $\delta$  7.99 – 7.94 (m, 2H), 7.82 – 7.80 (m, 2H), 7.66 – 7.63 (m, 2H), 7.38 – 7.35 (m, 2H);  $^{13}\text{C NMR}$  (100 MHz, DMSO)  $\delta$  166.9, 134.6, 132.3, 131.5, 130.6, 127.9, 123.9, 121.8. The spectral data are consistent with those reported in the literature.<sup>[1]</sup>

### 2-(*m*-Tolyl)isoindoline-1,3-dione (3n)

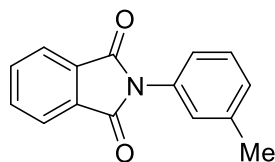

3n

EtOAc/*n*-Hexane = 1/8 (eluent); white solid, 27% yield, 12.8 mg;  $^1\text{H NMR}$  (400 MHz,  $\text{CDCl}_3$ )  $\delta$  7.97 – 7.93 (m, 2H), 7.81 – 7.78 (m, 2H), 7.39 (t,  $J = 7.8$  Hz, 1H), 7.23 (s, 2H), 7.21 (s, 1H), 2.42 (s, 3H);  $^{13}\text{C NMR}$  (100 MHz,  $\text{CDCl}_3$ )  $\delta$  167.4, 139.2, 134.4, 131.8, 131.5, 129.1, 129.0, 127.3, 123.8, 123.7, 21.4. The spectral data are consistent with those reported in the literature.<sup>[1]</sup>

### 2-(*o*-Tolyl)isoindoline-1,3-dione (**3o**)

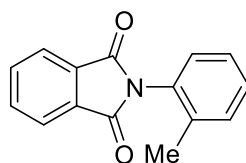

**3o**

EtOAc/*n*-Hexane = 1/8 (eluent); white solid, 16% yield, 7.6 mg;  $^1\text{H NMR}$  (400 MHz,  $\text{CDCl}_3$ )  $\delta$  7.97 – 7.95 (m, 2H), 7.82 – 7.79 (m, 2H), 7.41 – 7.30 (m, 3H), 7.21 (d,  $J = 7.6$  Hz, 1H), 2.21 (s, 3H);  $^{13}\text{C NMR}$  (100 MHz,  $\text{CDCl}_3$ )  $\delta$  167.3, 136.5, 134.3, 132.0, 131.1, 130.5, 129.4, 128.7, 126.9, 123.7, 18.0. The spectral data are consistent with those reported in the literature.<sup>[1]</sup>

### 2-(2-Fluorophenyl)isoindoline-1,3-dione (**3p**)

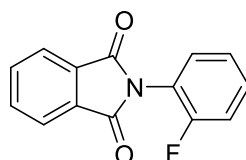

**3p**

EtOAc/*n*-Hexane = 1/8 (eluent); white solid, 11% yield, 5.3 mg;  $^1\text{H NMR}$  (400 MHz,  $\text{CDCl}_3$ )  $\delta$  7.98 – 7.95 (m, 2H), 7.82 – 7.78 (m, 2H), 7.49 – 7.41 (m, 1H), 7.37 (dd,  $J = 10.4, 4.4$  Hz, 1H), 7.28 (dd,  $J = 16.8, 8.4$  Hz, 2H);  $^{13}\text{C NMR}$  (100 MHz,  $\text{CDCl}_3$ )  $\delta$  166.5, 157.9 (d,  $J = 251$  Hz), 134.4, 132.0, 130.8 (d,  $J = 8$  Hz), 130.7, 129.8, 124.7 (d,  $J = 4$  Hz), 123.9, 119.3 (d,  $J = 13$  Hz), 116.7 (d,  $J = 19$  Hz);  $^{19}\text{F NMR}$  (376 MHz,  $\text{CDCl}_3$ )  $\delta$  -118.70. The spectral data are consistent with those reported in the literature.<sup>[6]</sup>

### 2-(2-Bromophenyl)isoindoline-1,3-dione (**3q**)

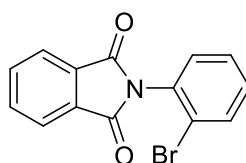

**3q**

EtOAc/*n*-Hexane = 1/8 (eluent); white solid, 18% yield, 10.8 mg;  $^1\text{H NMR}$  (400 MHz,  $\text{CDCl}_3$ )  $\delta$  8.0 – 7.96 (m, 2H), 7.84 – 7.80 (m, 2H), 7.75 (d,  $J = 8.0$  Hz, 1H), 7.48 (t,  $J = 7.2$  Hz, 1H), 7.36 (t,  $J = 8.0$  Hz, 2H).  $^{13}\text{C NMR}$  (100 MHz,  $\text{CDCl}_3$ )  $\delta$  166.6, 134.5, 133.6, 131.9, 131.4, 131.0, 130.9, 128.5, 124.0, 123.4. The spectral data are consistent with those reported in the literature.<sup>[7]</sup>

### 4-Methyl-2-(*p*-tolyl)isoindoline-1,3-dione (**3r**)

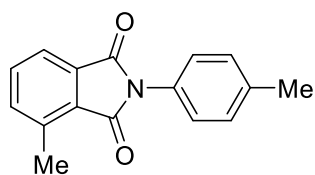

**3r**

EtOAc/*n*-Hexane = 1/8 (eluent); white solid, 64% yield, 32.1 mg;  $^1\text{H NMR}$  (400 MHz,  $\text{CDCl}_3$ )  $\delta$  7.77 (d,  $J = 7.2$  Hz, 1H), 7.63 (t,  $J = 7.6$  Hz, 1H), 7.52 (d,  $J = 7.6$  Hz, 1H), 7.30 (s, 4H), 2.74 (s, 3H), 2.41 (s, 3H).  $^{13}\text{C NMR}$  (100 MHz,  $\text{CDCl}_3$ )  $\delta$  168.2, 167.5, 138.4, 138.1, 136.7, 133.8, 132.3, 129.8, 129.1, 128.5, 126.6, 121.4, 21.3, 17.8. The spectral data are consistent with those reported in the literature.<sup>[8]</sup>

#### 2-(4-Chlorophenyl)-4-methylisoindoline-1,3-dione (3s)

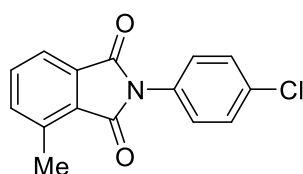

**3s**

EtOAc/*n*-Hexane = 1/8 (eluent); white solid, 50% yield, 27.1 mg;  $^1\text{H NMR}$  (400 MHz,  $\text{CDCl}_3$ )  $\delta$  7.78 (d,  $J = 7.2$  Hz, 1H), 7.65 (t,  $J = 7.2$  Hz, 1H), 7.54 (d,  $J = 7.6$  Hz, 1H), 7.47 (d,  $J = 8.4$  Hz, 2H), 7.40 (d,  $J = 8.4$  Hz, 2H), 2.74 (s, 3H).  $^{13}\text{C NMR}$  (100 MHz,  $\text{CDCl}_3$ )  $\delta$  167.7, 167.0, 138.6, 136.9, 134.0, 133.6, 132.0, 130.2, 129.2, 128.2, 127.7, 121.5, 17.7; HRMS ESI( $m/z$ ):  $[\text{M}+\text{H}]^+$  calcd. for  $\text{C}_{15}\text{H}_{11}\text{ClNO}_2$ : 272.0473, found: 272.0470.

#### 4-Chloro-2-(*p*-tolyl)isoindoline-1,3-dione (3t)

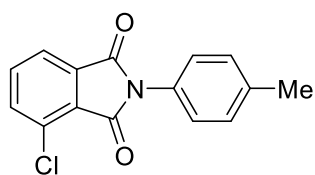

**3t**

EtOAc/*n*-Hexane = 1/8 (eluent); white solid, 78% yield, 42.3 mg;  $^1\text{H NMR}$  (400 MHz,  $\text{CDCl}_3$ )  $\delta$  7.86 (p,  $J = 4.4$  Hz, 1H), 7.70 (d,  $J = 4.4$  Hz, 2H), 7.30 (s, 4H), 2.41 (s, 3H).  $^{13}\text{C NMR}$  (100 MHz,  $\text{CDCl}_3$ )  $\delta$  166.0, 165.0, 138.4, 136.1, 135.2, 133.9, 131.8, 129.8, 128.6, 127.5, 126.5, 122.2. The spectral data are consistent with those reported in the literature.<sup>[9]</sup>

#### 5-Methyl-2-(*p*-tolyl)isoindoline-1,3-dione (3u)

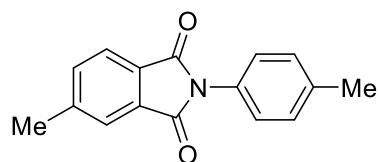

**3u**

EtOAc/*n*-Hexane = 1/8 (eluent); white solid, 67% yield, 33.6 mg;  $^1\text{H NMR}$  (400 MHz,  $\text{CDCl}_3$ )  $\delta$  7.83 (d,  $J = 7.4$  Hz, 1H), 7.75 (s, 1H), 7.57 (d,  $J = 7.4$  Hz, 1H), 7.33 – 7.28 (, 4H), 2.55 (s, 3H), 2.41 (s, 3H).  $^{13}\text{C NMR}$  (100 MHz,  $\text{CDCl}_3$ )  $\delta$  167.7, 167.6, 145.7, 138.1, 134.9, 132.2, 129.8, 129.2, 129.1, 126.5, 124.2, 123.6, 22.1, 21.2. The spectral data are consistent with those reported in the literature.<sup>[8]</sup>

### 2-(4-Ethylphenyl)-5-methylisoindoline-1,3-dione (3v)

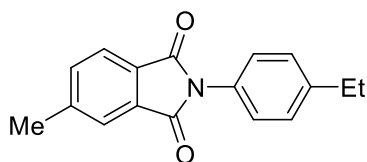

**3v**

EtOAc/*n*-Hexane = 1/8 (eluent); white solid, 65% yield, 34.5 mg;  $^1\text{H NMR}$  (400 MHz,  $\text{CDCl}_3$ )  $\delta$  7.83 (d,  $J = 7.6$  Hz, 1H), 7.75 (s, 1H), 7.58 (s, 1H), 7.33 (s, 4H), 2.70 (q,  $J = 7.4$  Hz, 2H), 2.55 (s, 3H), 1.27 (t,  $J = 7.6$  Hz, 3H).  $^{13}\text{C NMR}$  (100 MHz,  $\text{CDCl}_3$ )  $\delta$  167.6, 167.5, 145.6, 144.2, 134.8, 132.1, 129.2, 128.5, 126.4, 124.2, 123.6, 28.6, 22.0, 15.4. The spectral data are consistent with those reported in the literature.<sup>[10]</sup>

### 2-(4-Isopropylphenyl)-5-methylisoindoline-1,3-dione (3w)

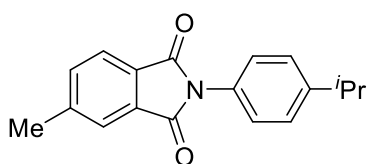

**3w**

EtOAc/*n*-Hexane = 1/8 (eluent); white solid, 57% yield, 31.8 mg;  $^1\text{H NMR}$  (400 MHz,  $\text{CDCl}_3$ )  $\delta$  7.82 (d,  $J = 7.6$  Hz, 1H), 7.75 (s, 1H), 7.57 (d,  $J = 7.6$  Hz, 1H), 7.39 – 7.31 (m, 4H), 2.96 (m,  $J = 6.8$  Hz, 1H), 2.54 (s, 3H), 1.28 (d,  $J = 6.8$  Hz, 6H).  $^{13}\text{C NMR}$  (100 MHz,  $\text{CDCl}_3$ )  $\delta$  167.6, 167.5, 148.7, 145.6, 134.9, 132.2, 129.2, 129.2, 127.1, 126.3, 124.2, 123.6, 33.9, 23.9, 22.0. The spectral data are consistent with those reported in the literature.<sup>[11]</sup>

### 2-(4-Methoxyphenyl)-5-methylisoindoline-1,3-dione (3x)

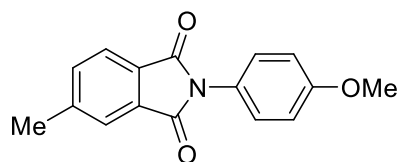

**3x**

EtOAc/*n*-Hexane = 1/5 (eluent); white solid, 78% yield, 41.7 mg;  $^1\text{H NMR}$  (400 MHz,  $\text{CDCl}_3$ )  $\delta$  7.82 (d,  $J = 7.6$  Hz, 1H), 7.74 (s, 1H), 7.57 (d,  $J = 7.6$  Hz, 1H), 7.33 (d,  $J = 8.8$  Hz, 2H), 7.02 (d,  $J = 8.8$  Hz, 2H), 3.85 (s, 3H), 2.54 (s, 3H).  $^{13}\text{C NMR}$  (100 MHz,  $\text{CDCl}_3$ )  $\delta$  167.8, 167.7, 159.2, 145.7, 134.9, 132.2, 129.2, 128.0, 124.4, 124.2, 123.6, 114.5, 55.5, 22.1. The spectral data are consistent with those reported in the literature.<sup>[11]</sup>

### 2-(4-Chlorophenyl)-5-methylisoindoline-1,3-dione (3y)

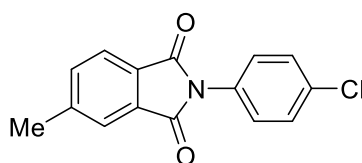

**3y**

EtOAc/*n*-Hexane = 1/8 (eluent); white solid, 54% yield, 29.3 mg;  $^1\text{H NMR}$  (400 MHz,  $\text{CDCl}_3$ )  $\delta$  7.84 (d,  $J = 7.6$  Hz, 1H), 7.76 (s, 1H), 7.59 (d,  $J = 7.6$  Hz, 1H), 7.48 (d,  $J = 8.8$  Hz, 2H), 7.41 (d,  $J = 8.8$  Hz, 2H), 2.56 (s, 3H).  $^{13}\text{C NMR}$  (100 MHz,  $\text{CDCl}_3$ )  $\delta$  167.2, 167.1, 146.0, 135.2, 133.7, 132.0, 130.3, 129.3, 129.0, 127.7, 124.4, 123.8, 22.1. The spectral data are consistent with those reported in the literature.<sup>[11]</sup>

### 5-(*tert*-Butyl)-2-(*p*-tolyl)isoindoline-1,3-dione (3z)

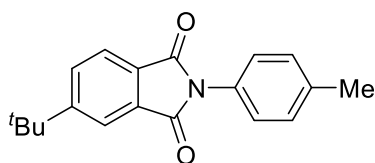

**3z**

EtOAc/*n*-Hexane = 1/8 (eluent); white solid, 47% yield, 27.6 mg;  $^1\text{H NMR}$  (400 MHz,  $\text{CDCl}_3$ )  $\delta$  7.98 (d,  $J = 1.6$  Hz, 1H), 7.87 (d,  $J = 8.0$  Hz, 1H), 7.80 (dd,  $J = 8.0, 1.6$  Hz, 1H), 7.33 – 7.28 (m, 4H), 2.41 (s, 3H), 1.40 (s, 9H).  $^{13}\text{C NMR}$  (100 MHz,  $\text{CDCl}_3$ )  $\delta$  167.9, 167.5, 159.0, 138.1, 132.1, 131.4, 129.8, 129.2, 129.1, 126.5, 123.6, 120.9, 35.9, 31.2, 21.3. The spectral data are consistent with those reported in the literature.<sup>[8]</sup>

### 5-(*tert*-Butyl)-2-(4-ethylphenyl)isoindoline-1,3-dione (3a')

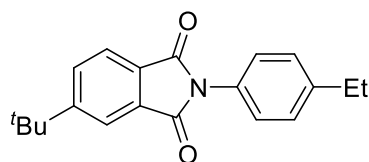

**3a'**

EtOAc/*n*-Hexane = 1/8 (eluent); white solid, 50% yield, 30.7 mg;  $^1\text{H}$  NMR (400 MHz,  $\text{CDCl}_3$ )  $\delta$  7.99 (s, 1H), 7.87 (d,  $J = 8.0$  Hz, 1H), 7.80 (d,  $J = 8.0$  Hz, 1H), 7.33 (s, 4H), 2.71 (q,  $J = 7.6$  Hz, 2H), 1.41 (s, 9H), 1.27 (t,  $J = 7.6$  Hz, 3H).  $^{13}\text{C}$  NMR (100 MHz,  $\text{CDCl}_3$ )  $\delta$  167.9, 167.5, 159.0, 144.2, 132.0, 131.3, 129.2, 129.1, 128.6, 126.5, 123.5, 120.9, 35.8, 31.1, 28.6, 15.4.; HRMS ESI( $m/z$ ):  $[\text{M}+\text{H}]^+$  calcd. for  $\text{C}_{20}\text{H}_{22}\text{NO}_2$ : 308.1645, found: 308.1643.

**5-Methoxy-2-(*p*-tolyl)isoindoline-1,3-dione (3b')**

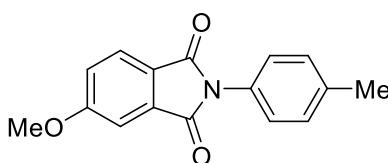

**3b'**

EtOAc/*n*-Hexane = 1/5 (eluent); white solid, 45% yield, 24.0 mg;  $^1\text{H}$  NMR (400 MHz,  $\text{CDCl}_3$ )  $\delta$  7.85 (d,  $J = 8.4$  Hz, 1H), 7.42 (d,  $J = 2.4$  Hz, 1H), 7.30 (s, 4H), 7.22 (dd,  $J = 8.4, 2.4$  Hz, 1H), 3.95 (s, 3H), 2.41 (s, 3H).  $^{13}\text{C}$  NMR (100 MHz,  $\text{CDCl}_3$ )  $\delta$  167.3, 167.2, 164.9, 138.0, 134.4, 129.7, 129.0, 126.4, 125.4, 123.6, 120.3, 108.1, 56.1, 21.2. The spectral data are consistent with those reported in the literature.<sup>[8]</sup>

**5-Fluoro-2-(4-methoxyphenyl)isoindoline-1,3-dione (3c')**

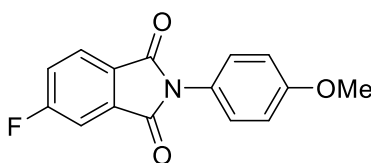

**3c'**

EtOAc/*n*-Hexane = 1/5 (eluent); white solid, 81% yield, 43.9 mg;  $^1\text{H}$  NMR (400 MHz,  $\text{CDCl}_3$ )  $\delta$  7.95 (dd,  $J = 8.0, 4.4$  Hz, 1H), 7.61 (dd,  $J = 7.2, 2.4$  Hz, 1H), 7.45 (td,  $J = 8.4, 2.4$  Hz, 1H), 7.35 – 7.29 (m, 2H), 7.02 (dd,  $J = 9.6, 2.4$  Hz, 2H), 3.85 (s, 3H).  $^{13}\text{C}$  NMR (100 MHz,  $\text{CDCl}_3$ )  $\delta$  166.6 (d,  $J = 256$  Hz), 166.5, 166.1, 159.3, 134.7 (d,  $J = 9$  Hz), 127.8, 127.6 (d,  $J = 3$  Hz), 126.1 (d,  $J = 9$  Hz), 124.0, 121.4 (d,  $J = 24$  Hz), 114.5, 111.4 (d,  $J = 25$  Hz), 55.5;  $^{19}\text{F}$  NMR (376 MHz,  $\text{CDCl}_3$ )  $\delta$  -101.23. The spectral data are consistent with those reported in the literature.<sup>[12]</sup>

**2-(4-Chlorophenyl)-5-fluoroisoindoline-1,3-dione (3d')**



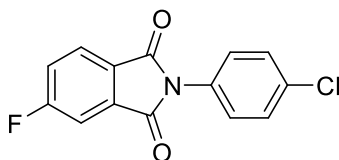

**3d'**

EtOAc/*n*-Hexane = 1/8 (eluent); white solid, 74% yield, 40.7 mg;  $^1\text{H NMR}$  (400 MHz,  $\text{CDCl}_3$ )  $\delta$  7.97 (dd,  $J = 8.0, 4.4$  Hz, 1H), 7.64 (dd,  $J = 6.8, 1.6$  Hz, 1H), 7.49 (d,  $J = 8.8$  Hz, 3H), 7.40 (d,  $J = 8.8$  Hz, 2H).  $^{13}\text{C NMR}$  (100 MHz,  $\text{CDCl}_3$ )  $\delta$  168.0, 165.9, 165.7, 165.4, 134.5, 134.4, 134.0, 130.0, 129.4, 127.6, 127.4, 127.4, 126.4, 126.3, 121.8, 121.6, 111.8, 111.5.  $^{19}\text{F NMR}$  (376 MHz,  $\text{CDCl}_3$ )  $\delta$  -100.58. The spectral data are consistent with those reported in the literature.<sup>[12]</sup>

**5-Chloro-2-(*p*-tolyl)isoindoline-1,3-dione (3e')**

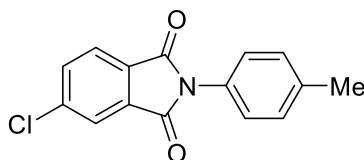

**3e'**

EtOAc/*n*-Hexane = 1/8 (eluent); white solid, 70% yield, 42.8 mg;  $^1\text{H NMR}$  (400 MHz,  $\text{CDCl}_3$ )  $\delta$  7.94 – 7.85 (m, 2H), 7.78 – 7.71 (m, 1H), 7.29 (dd,  $J = 13.2, 4.8$  Hz, 4H), 2.41 (s, 3H).  $^{13}\text{C NMR}$  (100 MHz,  $\text{CDCl}_3$ )  $\delta$  166.5, 166.2, 141.1, 138.5, 134.5, 133.5, 129.9, 129.2, 128.7, 126.4, 125.0, 124.2, 21.3. The spectral data are consistent with those reported in the literature; HRMS ESI( $m/z$ ):  $[\text{M}+\text{H}]^+$  calcd. for  $\text{C}_{15}\text{H}_{11}\text{ClNO}_2$ : 242.0473, found: 242.0475.

**5-Chloro-2-(4-ethylphenyl)isoindoline-1,3-dione (3f')**

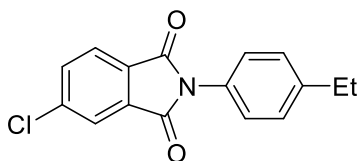

**3f'**

EtOAc/*n*-Hexane = 1/8 (eluent); white solid, 78% yield, 44.5 mg;  $^1\text{H NMR}$  (400 MHz,  $\text{CDCl}_3$ )  $\delta$  7.95 – 7.85 (m, 2H), 7.74 (dd,  $J = 8.0, 1.6$  Hz, 1H), 7.39 – 7.30 (m, 4H), 2.71 (q,  $J = 7.6$  Hz, 2H), 1.27 (t,  $J = 7.6$  Hz, 3H).  $^{13}\text{C NMR}$  (100 MHz,  $\text{CDCl}_3$ )  $\delta$  166.5, 166.2, 144.7, 141.1, 134.4, 133.5, 129.9, 128.8, 128.7, 126.4, 125.0, 124.1, 28.6, 15.5; HRMS ESI( $m/z$ ):  $[\text{M}+\text{H}]^+$  calcd. for  $\text{C}_{16}\text{H}_{13}\text{ClNO}_2$ : 286.0629, found: 286.0627.

**5-Chloro-2-(4-isopropylphenyl)isoindoline-1,3-dione (3g')**

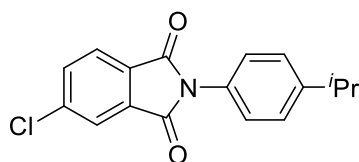

**3g'**

EtOAc/*n*-Hexane = 1/8 (eluent); white solid, 67% yield, 40.1 mg;  $^1\text{H}$  NMR (400 MHz,  $\text{CDCl}_3$ )  $\delta$  7.93 – 7.85 (m, 2H), 7.74 (d,  $J = 8.0$  Hz, 1H), 7.34 (q,  $J = 8.4$  Hz, 4H), 2.97 (hept,  $J = 6.8$  Hz, 1H), 1.28 (d,  $J = 6.8$  Hz, 6H).  $^{13}\text{C}$  NMR (100 MHz,  $\text{CDCl}_3$ )  $\delta$  166.5, 166.2, 149.2, 141.1, 134.4, 133.5, 129.9, 128.9, 127.3, 126.4, 125.0, 124.1, 34.0, 23.9; HRMS ESI( $m/z$ ):  $[\text{M}+\text{H}]^+$  calcd. for  $\text{C}_{17}\text{H}_{15}\text{ClNO}_2$ : 300.0786, found: 300.0791.

**5-Chloro-2-(4-(trifluoromethoxy)phenyl)isoindoline-1,3-dione (3h')**

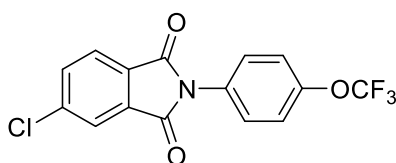

**3h'**

EtOAc/*n*-Hexane = 1/5 (eluent); white solid, 79% yield, 53.9 mg;  $^1\text{H}$  NMR (400 MHz,  $\text{CDCl}_3$ )  $\delta$  7.98 – 7.85 (m, 2H), 7.78 (d,  $J = 8.0$  Hz, 1H), 7.50 (d,  $J = 8.8$  Hz, 2H), 7.36 (d,  $J = 8.8$  Hz, 2H).  $^{13}\text{C}$  NMR (100 MHz,  $\text{CDCl}_3$ )  $\delta$  166.1, 165.8, 148.5, 141.4, 134.8, 133.2, 129.9, 129.6, 127.8, 125.2, 124.4, 121.7, 119.1.  $^{19}\text{F}$  NMR (376 MHz,  $\text{CDCl}_3$ )  $\delta$  -57.86; HRMS ESI( $m/z$ ):  $[\text{M}+\text{H}]^+$  calcd. for  $\text{C}_{15}\text{H}_8\text{ClF}_3\text{NO}_3$ : 342.0139, found: 342.0135.

**2-(4-Bromophenyl)-5-chloroisoindoline-1,3-dione (3i')**

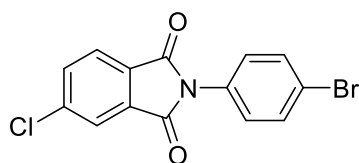

**3i'**

EtOAc/*n*-Hexane = 1/8 (eluent); white solid, 67% yield, 45.0 mg;  $^1\text{H}$  NMR (400 MHz,  $\text{CDCl}_3$ )  $\delta$  7.90 (dd,  $J = 11.6, 4.8$  Hz, 2H), 7.76 (dd,  $J = 8.0, 1.6$  Hz, 1H), 7.67 – 7.60 (m, 2H), 7.37 – 7.30 (m, 2H).  $^{13}\text{C}$  NMR (100 MHz,  $\text{CDCl}_3$ )  $\delta$  166.0, 165.7, 141.4, 134.7, 133.3, 132.4, 130.5, 129.6, 127.9, 125.1, 124.3, 122.1; HRMS ESI( $m/z$ ):  $[\text{M}+\text{H}]^+$  calcd. for  $\text{C}_{14}\text{H}_8\text{BrClNO}_2$ : 335.9421, found: 335.9417.

**5-Bromo-2-(*p*-tolyl)isoindoline-1,3-dione (3j')**

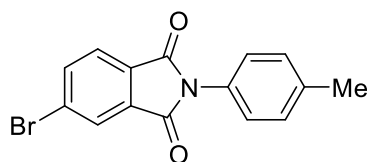

**3j'**

EtOAc/*n*-Hexane = 1/8 (eluent); white solid, 73% yield, 46.0 mg;  $^1\text{H NMR}$  (400 MHz,  $\text{CDCl}_3$ )  $\delta$  8.08 (d,  $J = 1.2$  Hz, 1H), 7.92 (dd,  $J = 8.0, 1.6$  Hz, 1H), 7.81 (d,  $J = 8.0$  Hz, 1H), 7.33 – 7.27 (m, 4H), 2.41 (s, 3H).  $^{13}\text{C NMR}$  (100 MHz,  $\text{CDCl}_3$ )  $\delta$  166.6, 166.1, 138.4, 137.3, 133.4, 130.3, 129.8, 129.2, 128.6, 127.0, 126.3, 125.0, 21.2. The spectral data are consistent with those reported in the literature.<sup>[13]</sup>

**5-Bromo-2-(4-methoxyphenyl)isoindoline-1,3-dione (3k')**

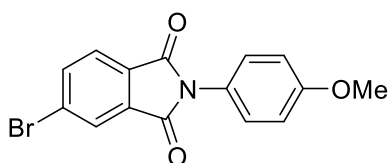

**3k'**

EtOAc/*n*-Hexane = 1/5 (eluent); white solid, 80% yield, 53.0 mg;  $^1\text{H NMR}$  (400 MHz,  $\text{CDCl}_3$ )  $\delta$  8.07 (s, 1H), 7.95 – 7.88 (m, 1H), 7.80 (d,  $J = 8.0$  Hz, 1H), 7.32 (d,  $J = 8.8$  Hz, 2H), 7.02 (d,  $J = 8.8$  Hz, 2H), 3.85 (s, 3H).  $^{13}\text{C NMR}$  (100 MHz,  $\text{CDCl}_3$ )  $\delta$  166.7, 166.2, 159.3, 137.3, 133.4, 130.3, 129.2, 127.8, 127.0, 125.0, 123.9, 114.5, 55.5. The spectral data are consistent with those reported in the literature.<sup>[13]</sup>

**5-bromo-2-(4-chlorophenyl)isoindoline-1,3-dione (3l')**

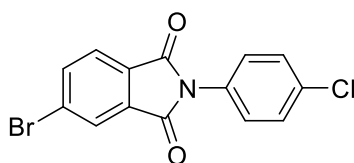

**3l'**

EtOAc/*n*-Hexane = 1/8 (eluent); white solid, 74% yield, 49.7 mg;  $^1\text{H NMR}$  (400 MHz,  $\text{CDCl}_3$ )  $\delta$  8.09 (d,  $J = 1.6$  Hz, 1H), 7.94 (dd,  $J = 8.0, 1.6$  Hz, 1H), 7.82 (d,  $J = 8.0$  Hz, 1H), 7.51 – 7.45 (m, 2H), 7.42 – 7.37 (m, 2H).  $^{13}\text{C NMR}$  (100 MHz,  $\text{CDCl}_3$ )  $\delta$  166.2, 165.7, 137.7, 134.1, 133.2, 130.1, 129.9, 129.6, 129.4, 127.6, 127.2, 125.2. The spectral data are consistent with those reported in the literature.<sup>[9]</sup>

**5-Bromo-2-(4-bromophenyl)isoindoline-1,3-dione (3m')**

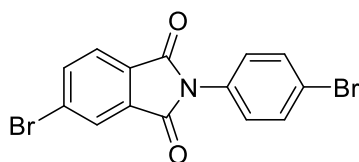

**3m'**

EtOAc/*n*-Hexane = 1/8 (eluent); white solid, 71% yield, 53.8 mg;  $^1\text{H}$  NMR (400 MHz,  $\text{CDCl}_3$ )  $\delta$  8.09 (d,  $J$  = 1.6 Hz, 1H), 7.94 (dd,  $J$  = 8.0, 1.6 Hz, 1H), 7.82 (d,  $J$  = 8.0 Hz, 1H), 7.66 – 7.62 (m, 2H), 7.36 – 7.31 (m, 2H).  $^{13}\text{C}$  NMR (100 MHz,  $\text{CDCl}_3$ )  $\delta$  166.1, 165.6, 137.7, 133.2, 132.4, 130.4, 130.1, 129.6, 127.9, 127.2, 125.3, 122.1. The spectral data are consistent with those reported in the literature.<sup>[14]</sup>

### 2-(*p*-Tolyl)-1H-benzo[*f*]isoindole-1,3(2H)-dione (3n')

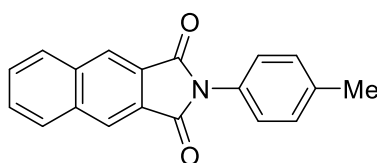

**3n'**

EtOAc/*n*-Hexane = 1/8 (eluent); white solid, 62% yield, 35.6 mg;  $^1\text{H}$  NMR (400 MHz,  $\text{CDCl}_3$ )  $\delta$  8.45 (s, 2H), 8.14 – 8.05 (m, 2H), 7.78 – 7.69 (m, 2H), 7.36 (t,  $J$  = 6.4 Hz, 4H), 2.43 (s, 3H).  $^{13}\text{C}$  NMR (100 MHz,  $\text{CDCl}_3$ )  $\delta$  167.3, 138.4, 135.7, 130.4, 129.8, 129.4, 129.2, 127.5, 126.5, 125.3, 21.30. The spectral data are consistent with those reported in the literature.<sup>[8]</sup>

## 7. References

- [1] X. Liu, J. Qin, W. Dai, Z. Zhu, P. Zhou, Y. Wang, J. Nie, Y. Yang and Z. Zhang, Metal-free and additive-free synthesis of imides and nitriles from ketones *via* oxidative cleavage of C(O)–C bonds, *ACS Catal.*, 2022, **12**, 13300–13311.
- [2] Y.-J. Lee, D.-H. Ahn, K.S. Lee, A.R. Kim, D.J. Yoo and M. Oelgemöller, Photoinduced electron transfer cyclizations of aryl-linked phthalimides, *Tetrahedron Lett.*, 2011, **52**, 5029–5031.
- [3] G. Pagani, A. Baruffini, P. Borgna and G. Caccialanza, Various *N*-substituted phthalamic acids. Effects on root geotropism in germinating seeds of *Lens esculenta*, *Farmacologia Scientifica*, 1968, **23**, 448–467.
- [4] M. Artico and W. C. J. Ross, Aryl-2-haloalkylamines. XXIV. Derivatives of *o*-, *m*- and *p*-aminophenol: synthesis and antineoplastic activities, *Biochem. Pharmacol.*, 1968, **17**, 893–898.
- [5] J. Wang, G. Meng, K. Xie, L. Li, H. Sun and Z. Huang, Mild and efficient Ni-catalyzed biaryl synthesis with polyfluoroaryl magnesium species: Verification of the arrest state, uncovering the hidden competitive second transmetalation and ligand-accelerated highly selective monoarylation, *ACS Catal.*, 2017, **7**, 7421–7430.
- [6] S. P. Chavan and B. M. Bhanage, Carbonylative synthesis of phthalimides and benzoxazinones by using phenyl formate as a carbon monoxide source. *Eur. J. Org. Chem.*, 2015, **2015**, 2405–2410.

- [7] M. V. Khedkar, S. R. Khan, K. P. Dhake and B. M. Bhanage, Carbonylative cyclization of o-halobenzoic acids for synthesis of *N*-substituted phthalimides using polymer-supported palladium-*N*-heterocyclic carbene as an efficient, heterogeneous, and reusable catalyst, *Synthesis*, 2012, **44**, 2623–2629.
- [8] R. Shi, F. Liao, H. Niu and A. Lei, Selective formation of phthalimides from amines, aldehydes and CO by Pd-catalyzed oxidative C–H aminocarbonylation, *Org. Chem. Front.*, 2018, **5**, 1957–1961.
- [9] A. M. S. El-Sharief and F. A. Eid, Action of Grignard reagents on halogenated phthalimides, *Egypt. J. Chem.*, 1982, **25**, 463–470.
- [10] M. Nandi and Ayusman Sen, Chemical basis for adhesion. Interaction of chromium with polyimide: model studies, *Chem. Mater.*, 1989, **1**, 291–292.
- [11] B. M. Barchin, A. M. Cuadro and J. Alvarez-Builla, Microwave-assisted parallel synthesis of a 2-aryl-1H-isoindole-1,3-dione library, *Synlett*, 2002, **2**, 343–345.
- [12] V. Kumar, K. Chand and E. Chorell, Synthesis of various *N*-substituted 4-aryloxy/thiophenoxy/thioisopropoxy-phthalimides, *ChemistrySelect*, 2017, **2**, 3293–3296.
- [13] G. Ankur, K. Bhagyashree and M. J. Nanjan Chandrasekar, Synthesis of biologically potent novel 5-(2-bromopyridin-3-yl-amino)-2-alkyl/aryl-isoindoline-1,3-dione analogs *via* Buchwald-Hartwig C–N coupling reaction, *Lett. Org. Chem.*, 2013, **10**, 139–146.
- [14] B. Sahoo, A.-E. Surkus, M.-M. Pohl, J. Radnik, M. Schneider, S. Bachmann, M. Scalone, K. Junge and M. Beller, A biomass-derived non-noble cobalt catalyst for selective hydrodehalogenation of alkyl and (hetero)aryl halides, *Angew. Chem., Int. Ed.*, 2017, **56**, 11242–11247.

## 8. NMR spectra of products

$^1\text{H}$  NMR of Compound **3a** (400 MHz,  $\text{CDCl}_3$ )

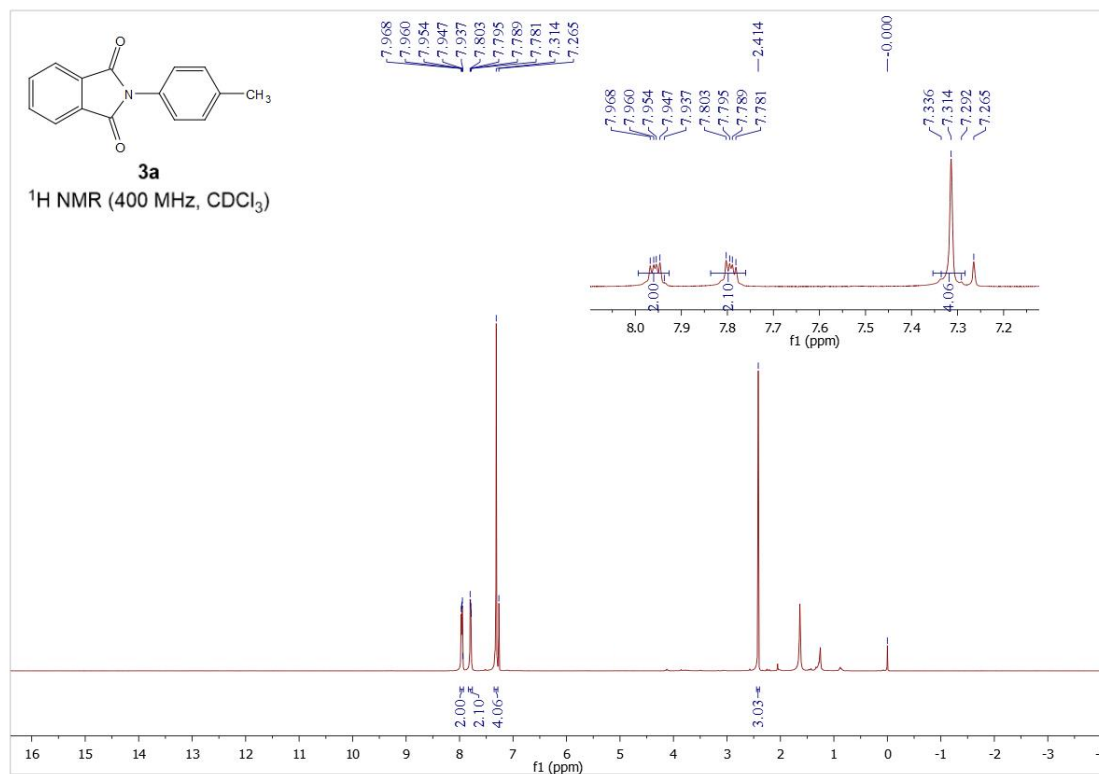

$^{13}\text{C}$  NMR of Compound **3a** (100 MHz,  $\text{CDCl}_3$ )

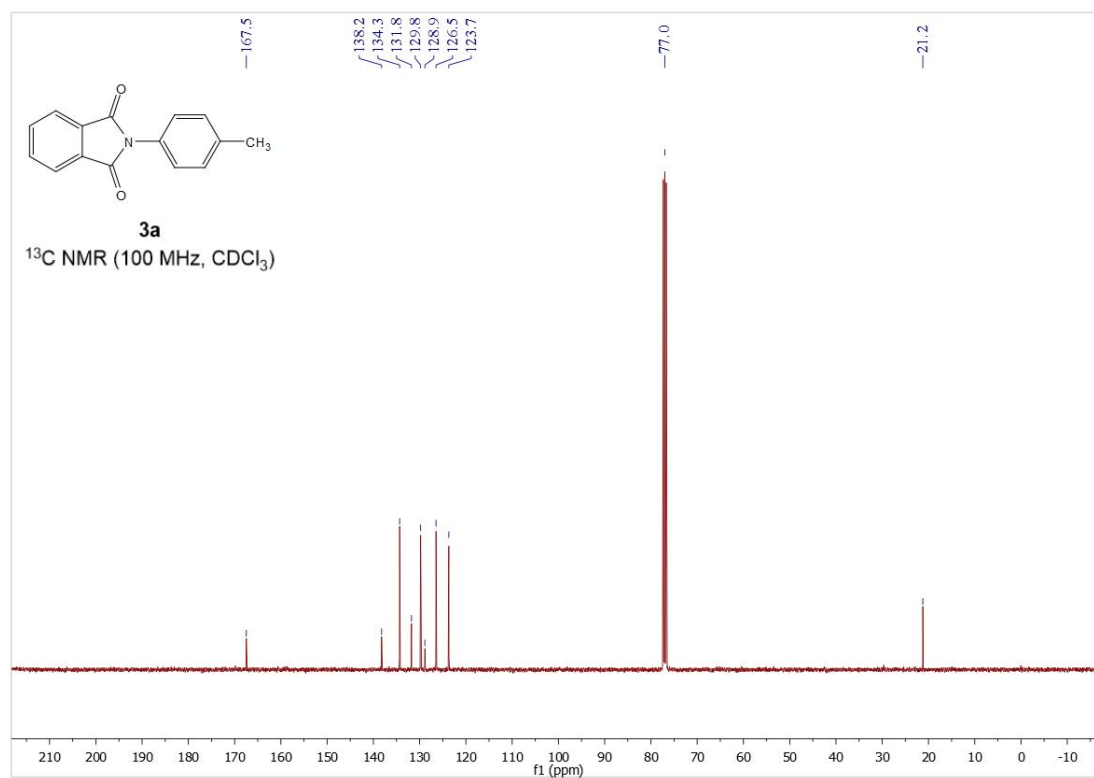

<sup>1</sup>H NMR of Compound **3b** (400 MHz, CDCl<sub>3</sub>)

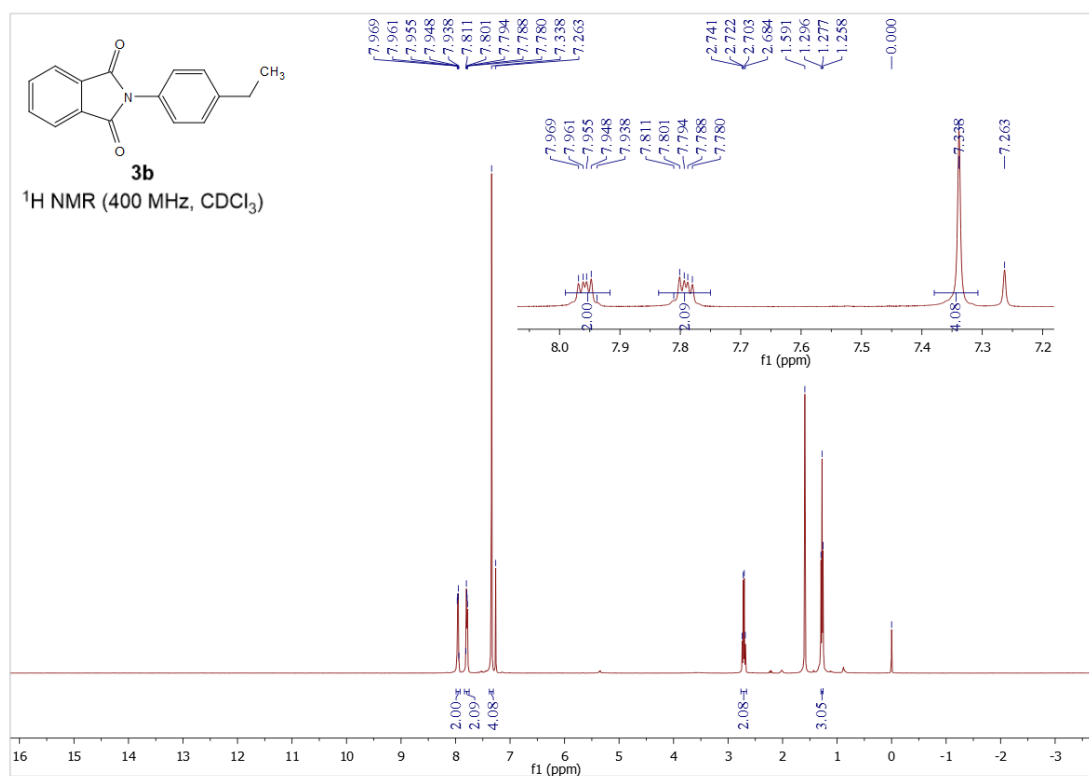

<sup>13</sup>C NMR of Compound **3b** (100 MHz, CDCl<sub>3</sub>)

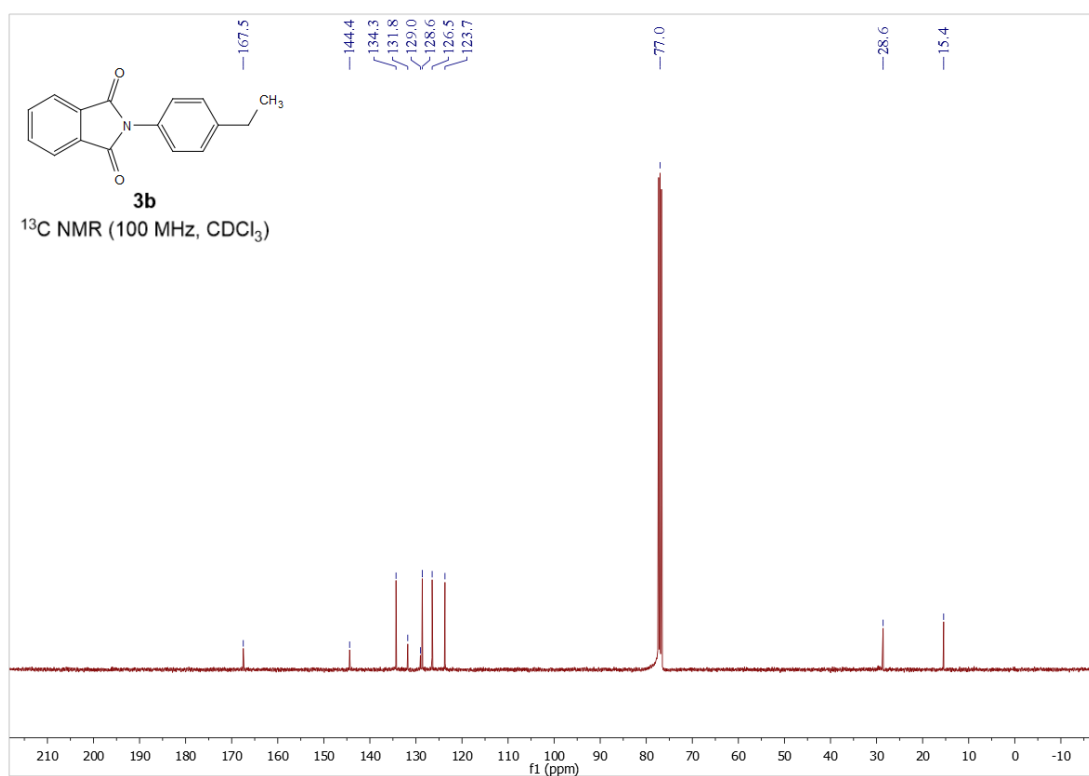

<sup>1</sup>H NMR of Compound **3c** (400 MHz, CDCl<sub>3</sub>)

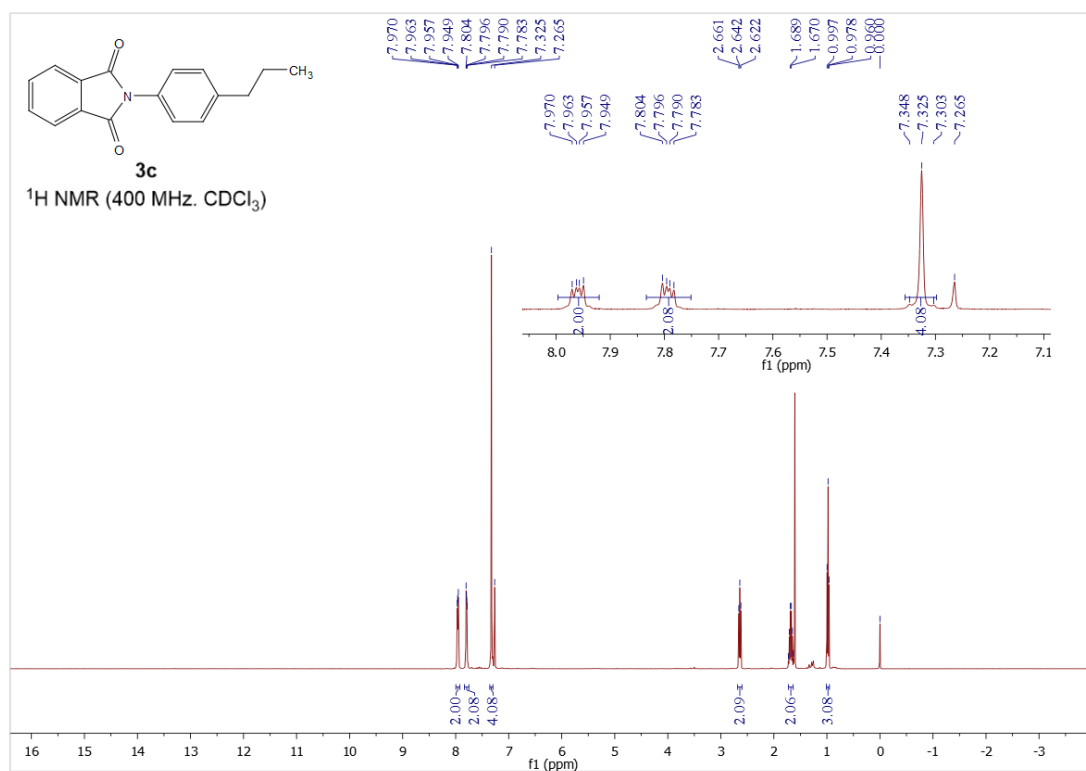

<sup>13</sup>C NMR of Compound **3c** (100 MHz, CDCl<sub>3</sub>)

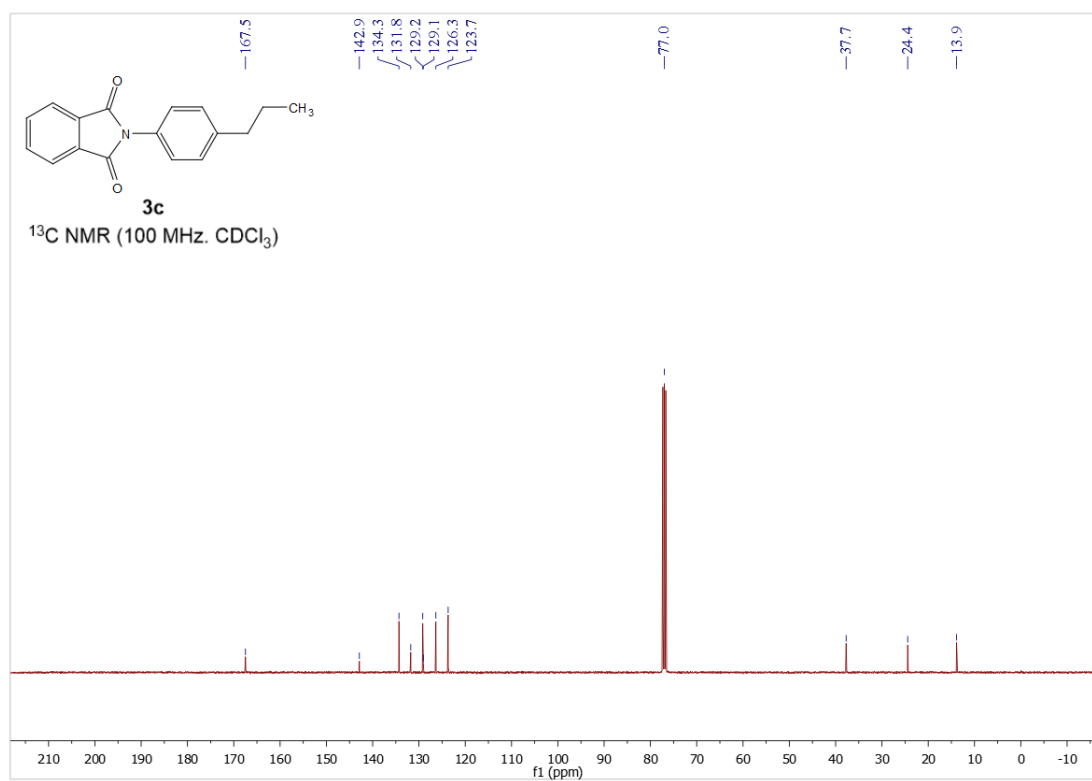





<sup>1</sup>H NMR of Compound **3e** (400 MHz, CDCl<sub>3</sub>)

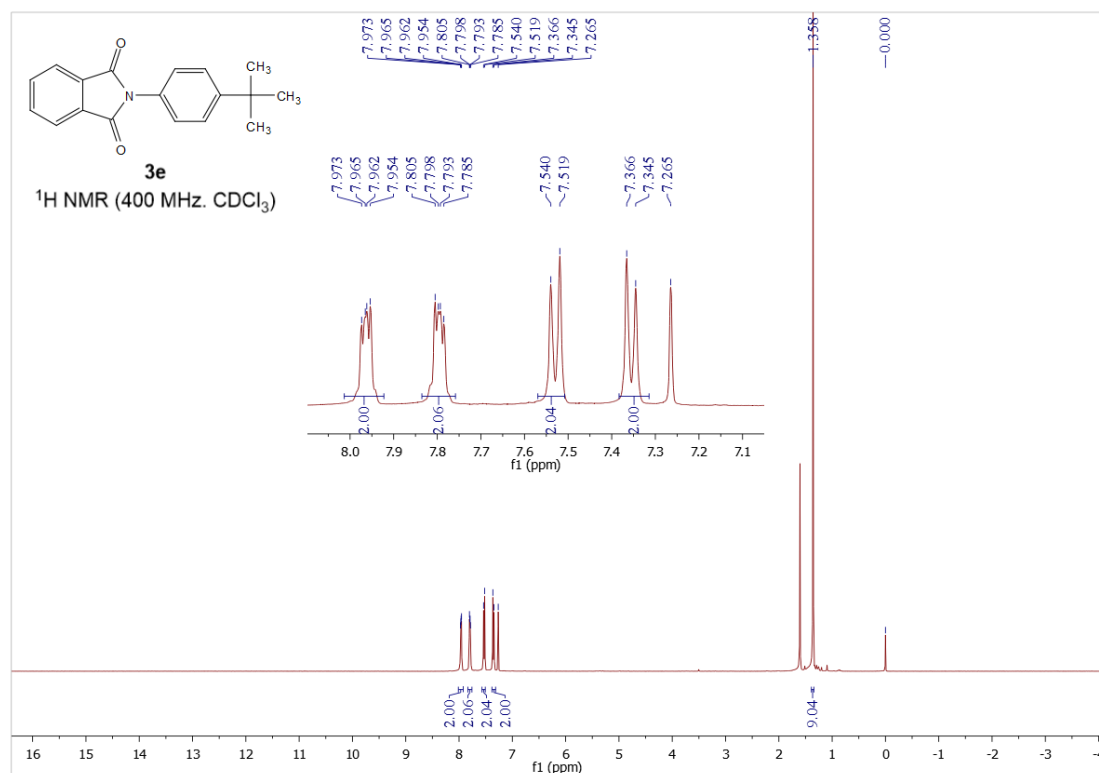

<sup>13</sup>C NMR of Compound **3e** (100 MHz, CDCl<sub>3</sub>)

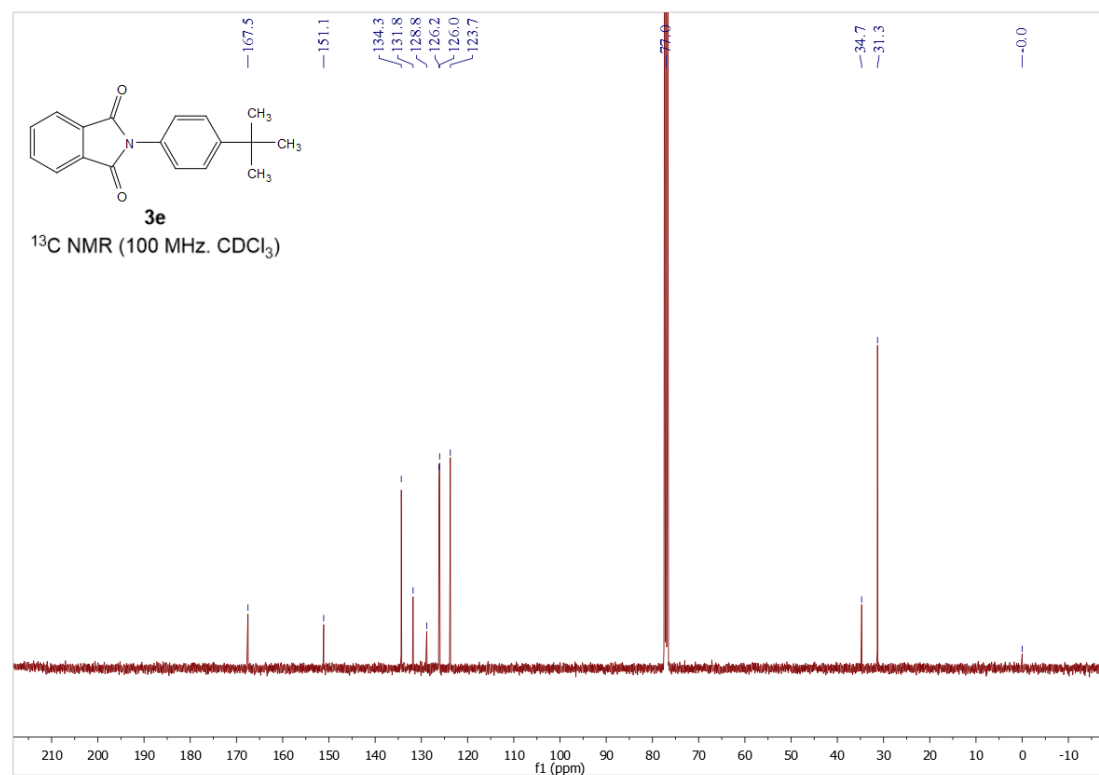

<sup>1</sup>H NMR of Compound **3f** (400 MHz, CDCl<sub>3</sub>)

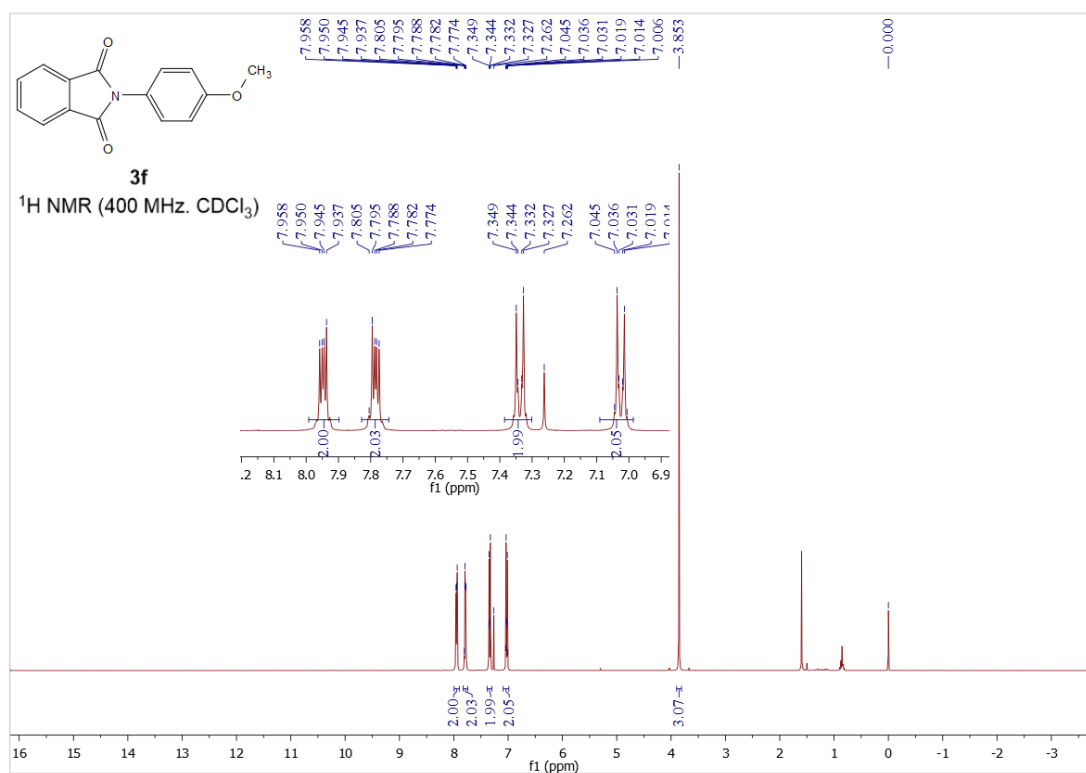

<sup>13</sup>C NMR of Compound **3f** (100 MHz, CDCl<sub>3</sub>)

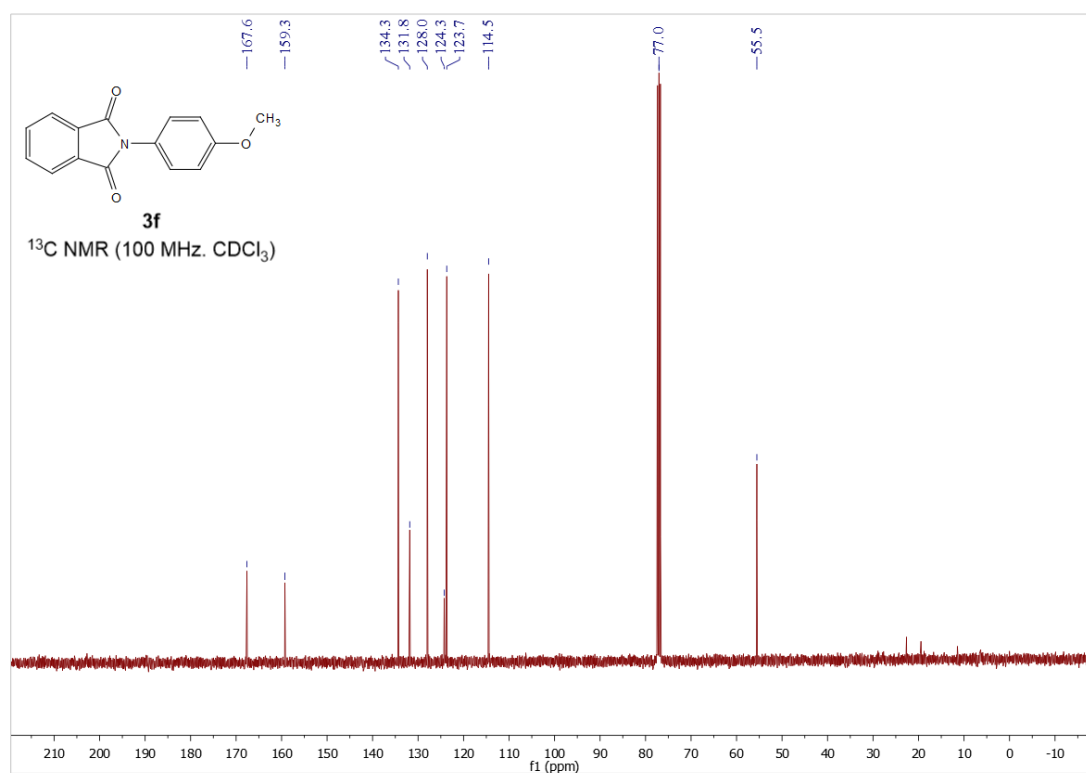

<sup>1</sup>H NMR of Compound **3g** (400 MHz, CDCl<sub>3</sub>)

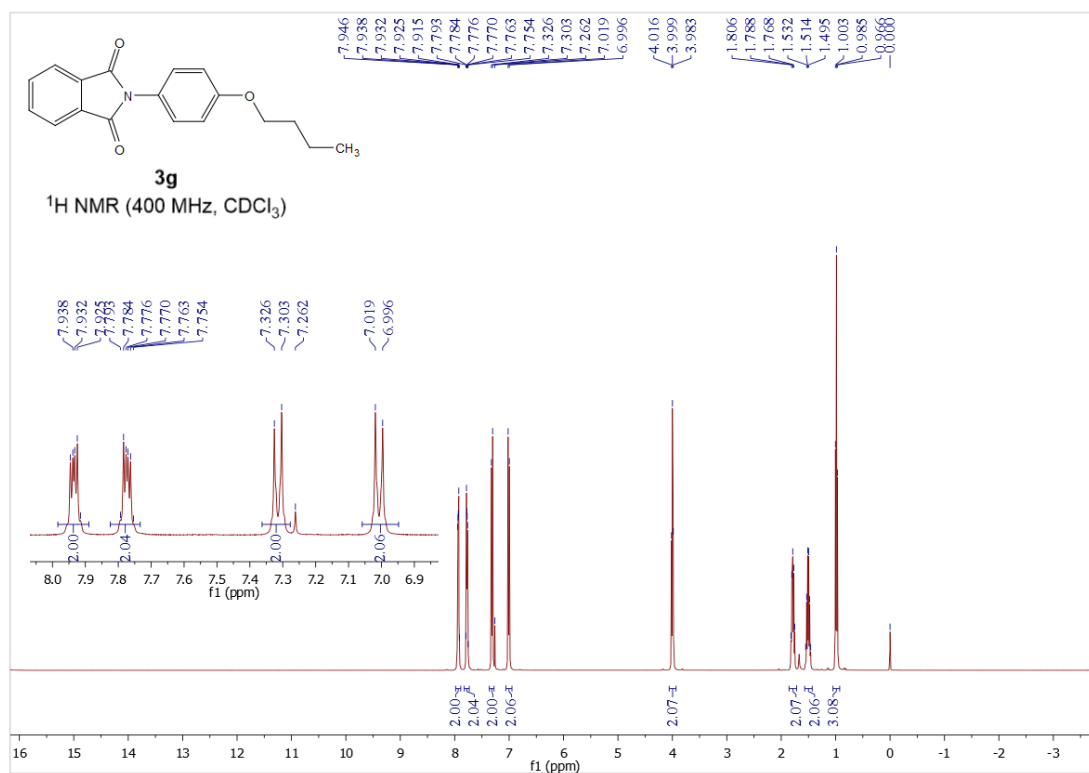

<sup>13</sup>C NMR of Compound **3g** (100 MHz, CDCl<sub>3</sub>)

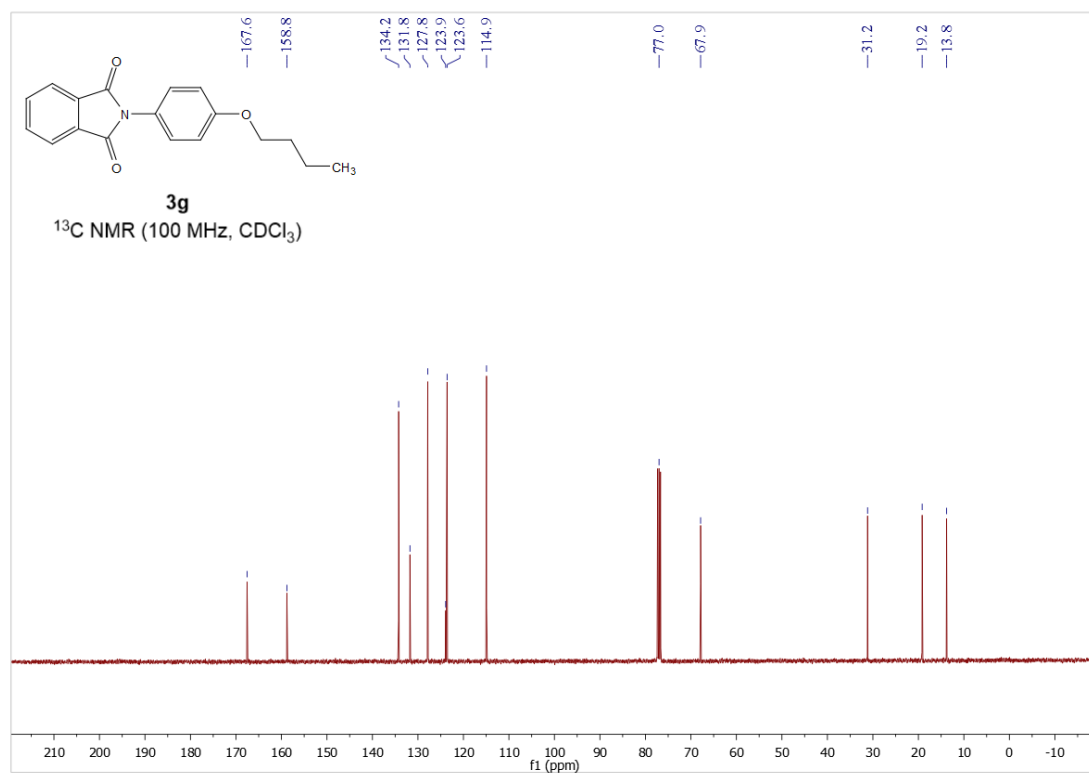

<sup>1</sup>H NMR of Compound **3h** (400 MHz, CDCl<sub>3</sub>)

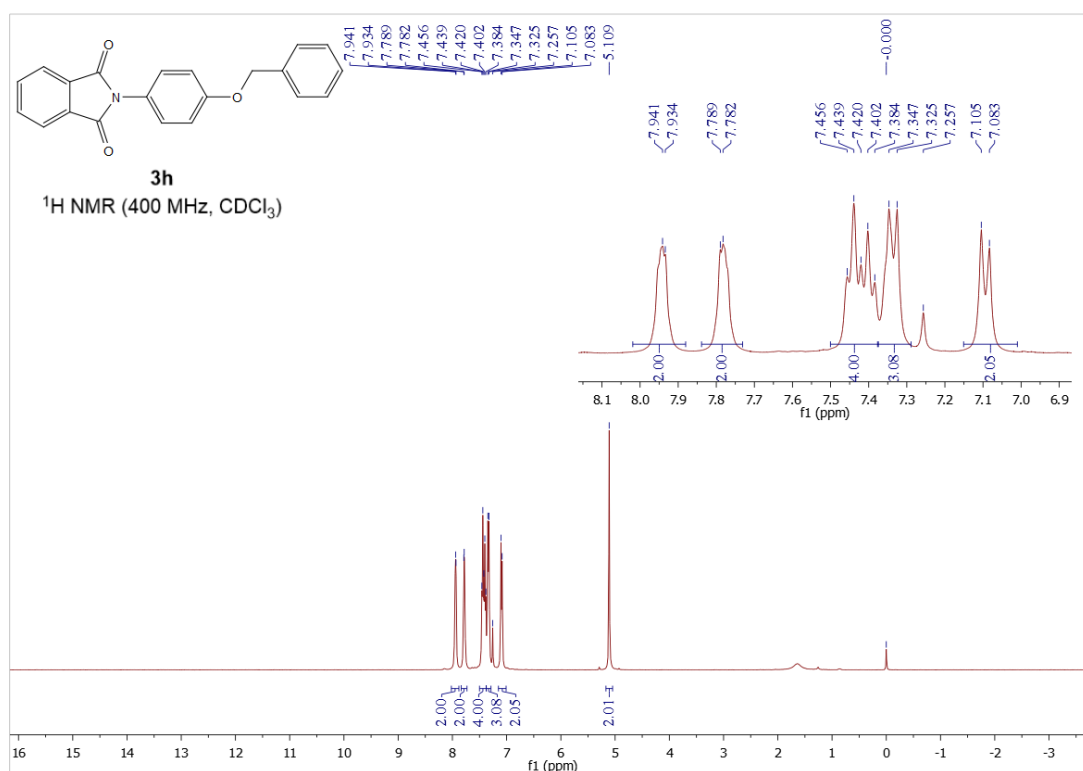

<sup>13</sup>C NMR of Compound **3h** (100 MHz, CDCl<sub>3</sub>)

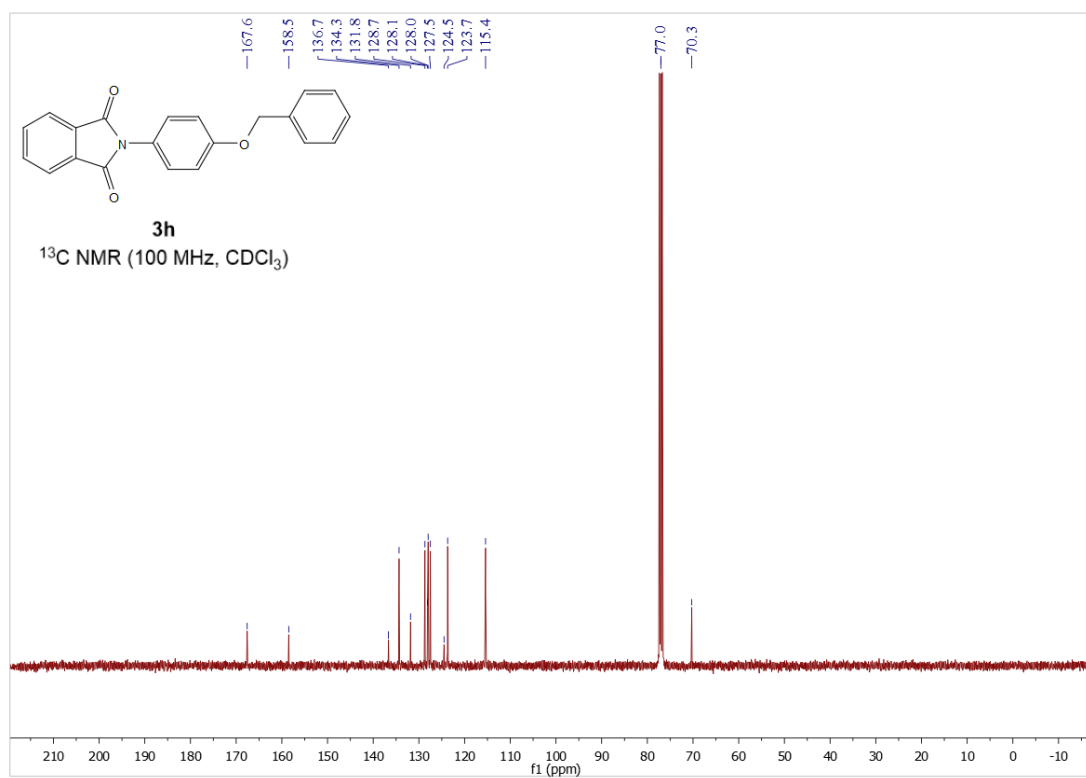

<sup>1</sup>H NMR of Compound **3i** (400 MHz, CDCl<sub>3</sub>)

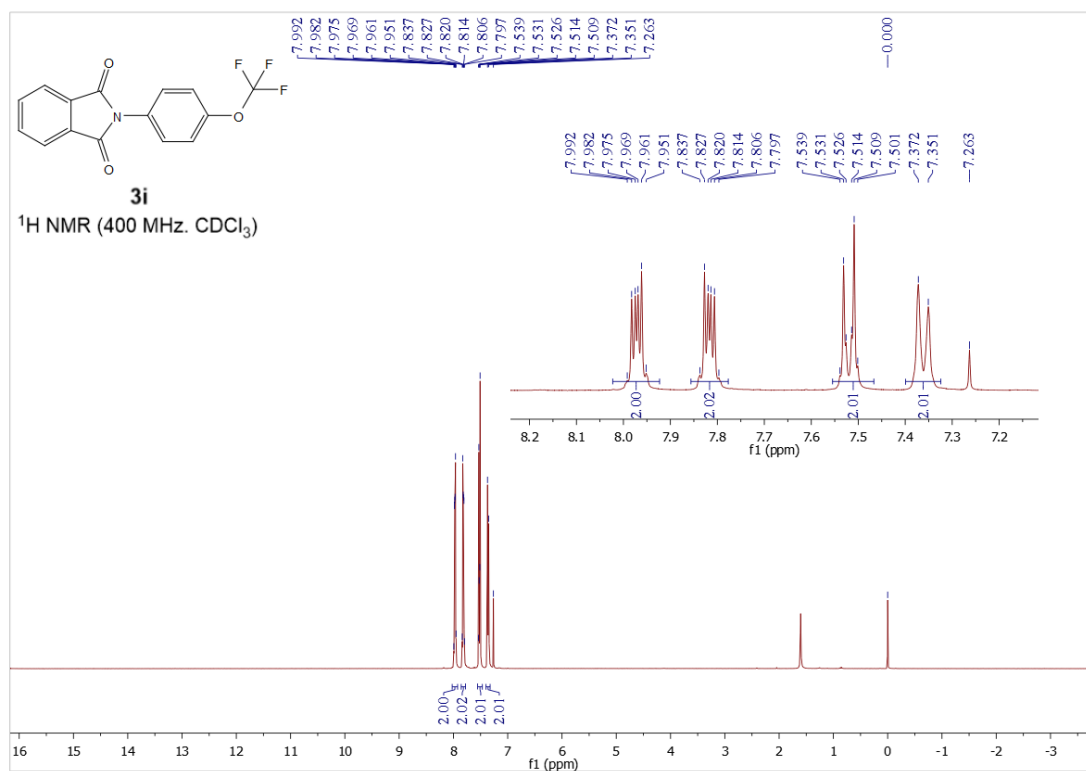

<sup>13</sup>C NMR of Compound **3i** (100 MHz, CDCl<sub>3</sub>)

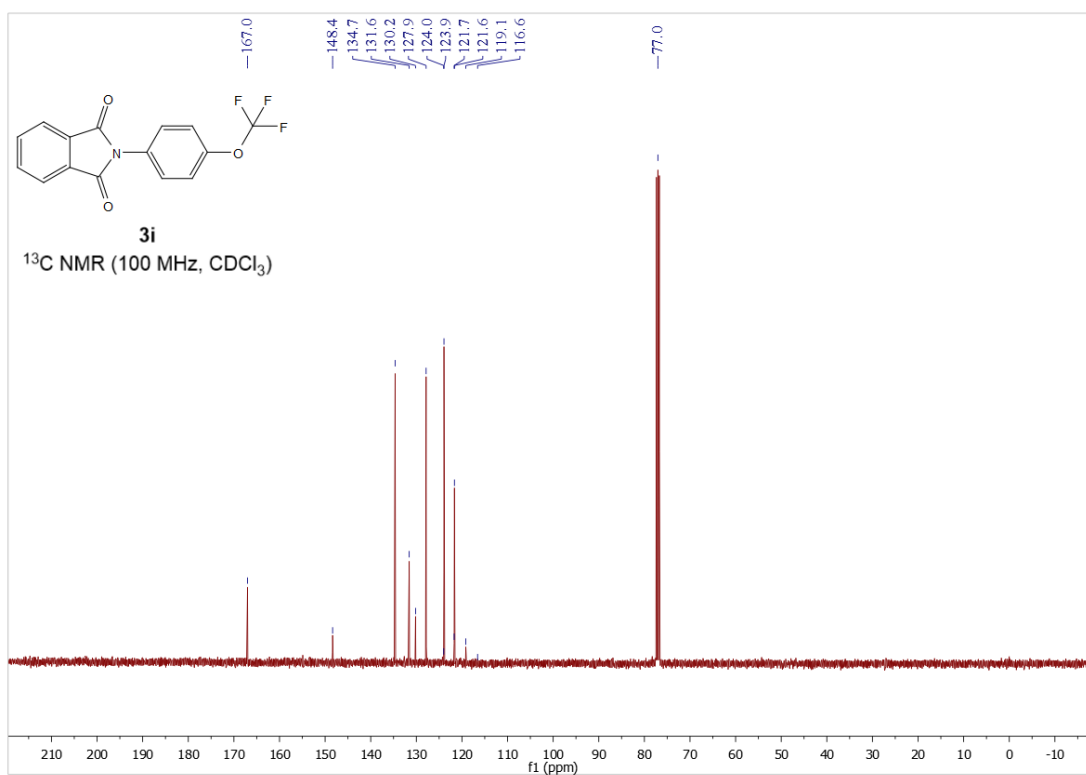

<sup>19</sup>F NMR of Compound **3i** (376 MHz, CDCl<sub>3</sub>)

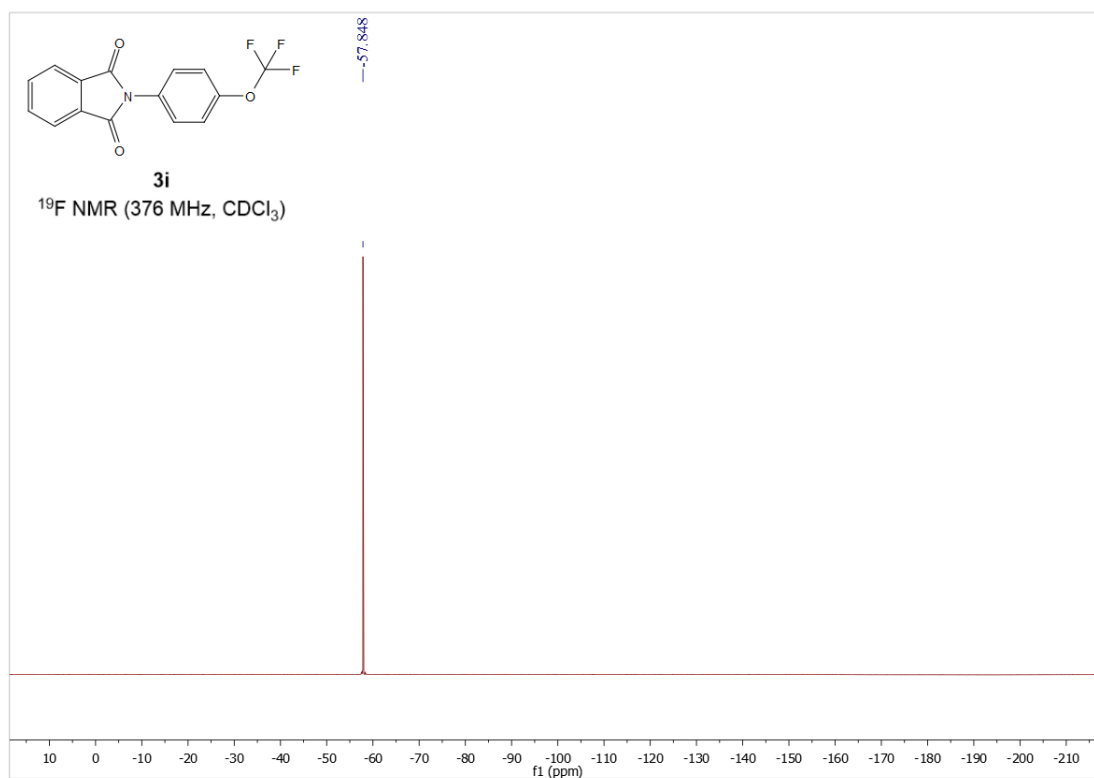

<sup>1</sup>H NMR of Compound **3j** (400 MHz, CDCl<sub>3</sub>)

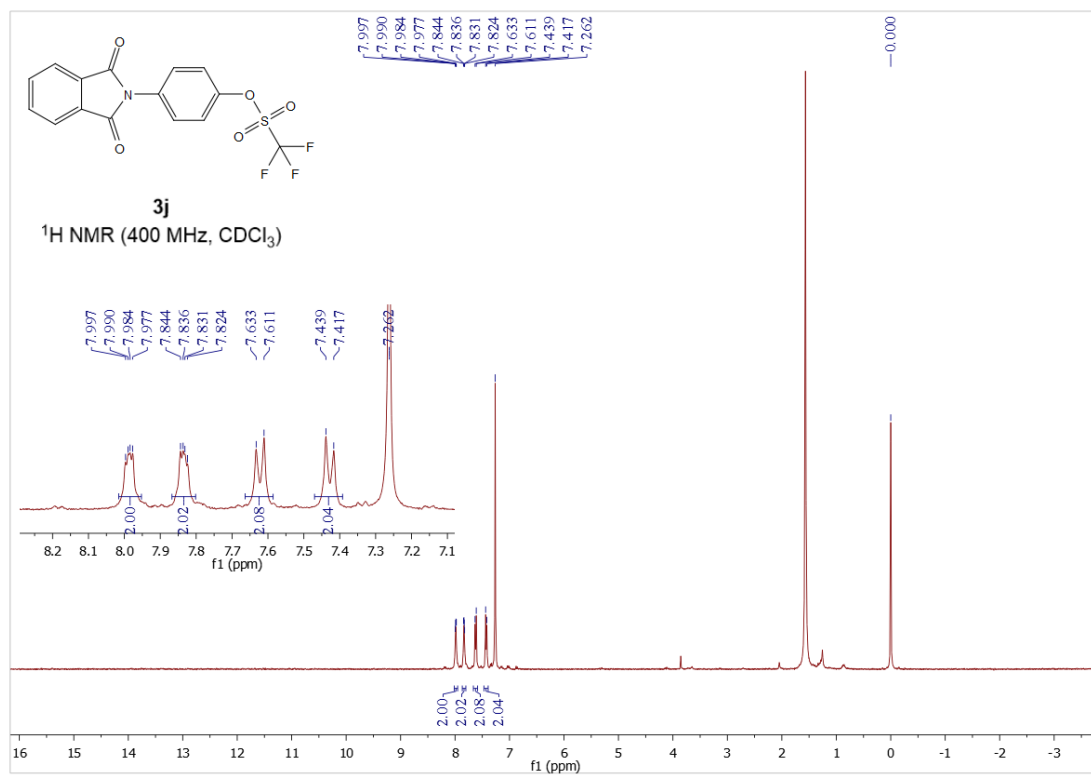

<sup>13</sup>C NMR of Compound **3j** (100 MHz, CDCl<sub>3</sub>)

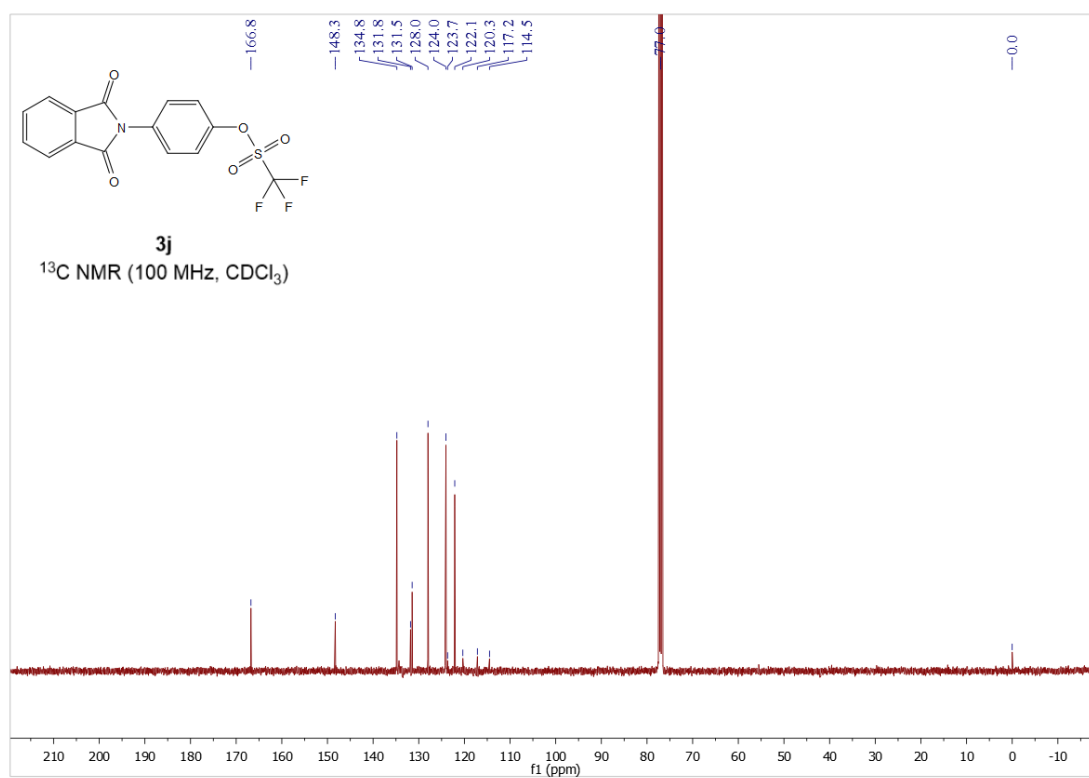

<sup>19</sup>F NMR of Compound **3j** (376 MHz, CDCl<sub>3</sub>)

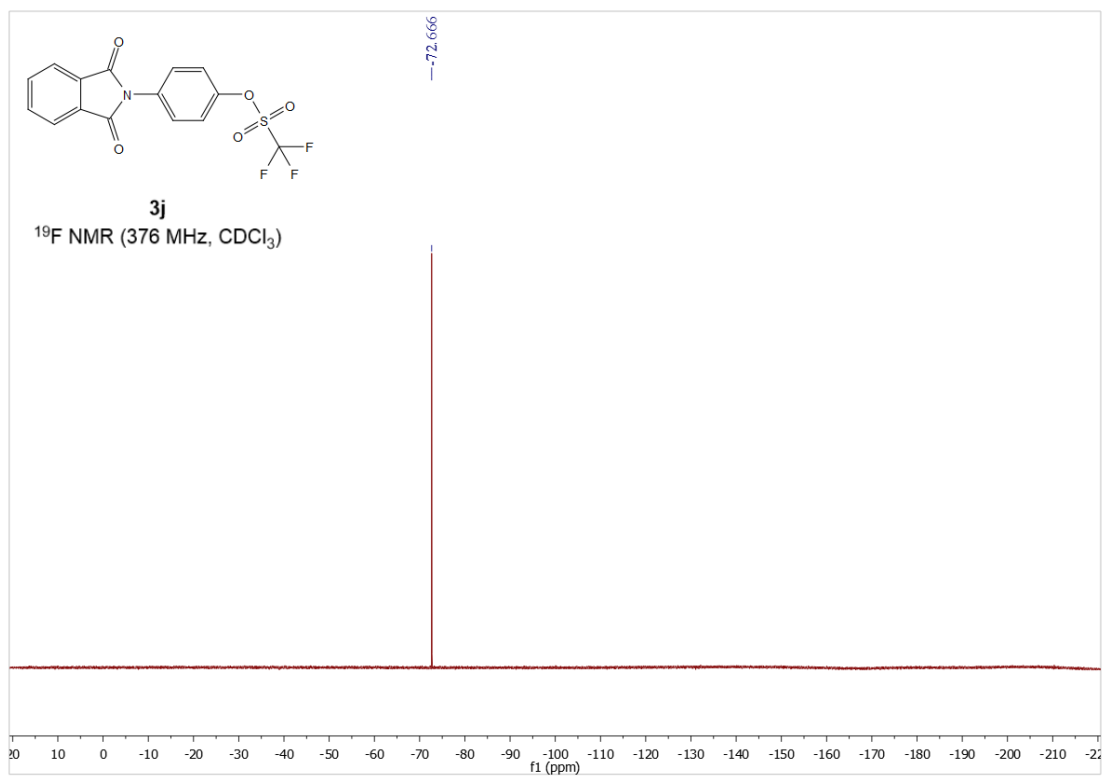



<sup>1</sup>H NMR of Compound **3k** (400 MHz, CDCl<sub>3</sub>)

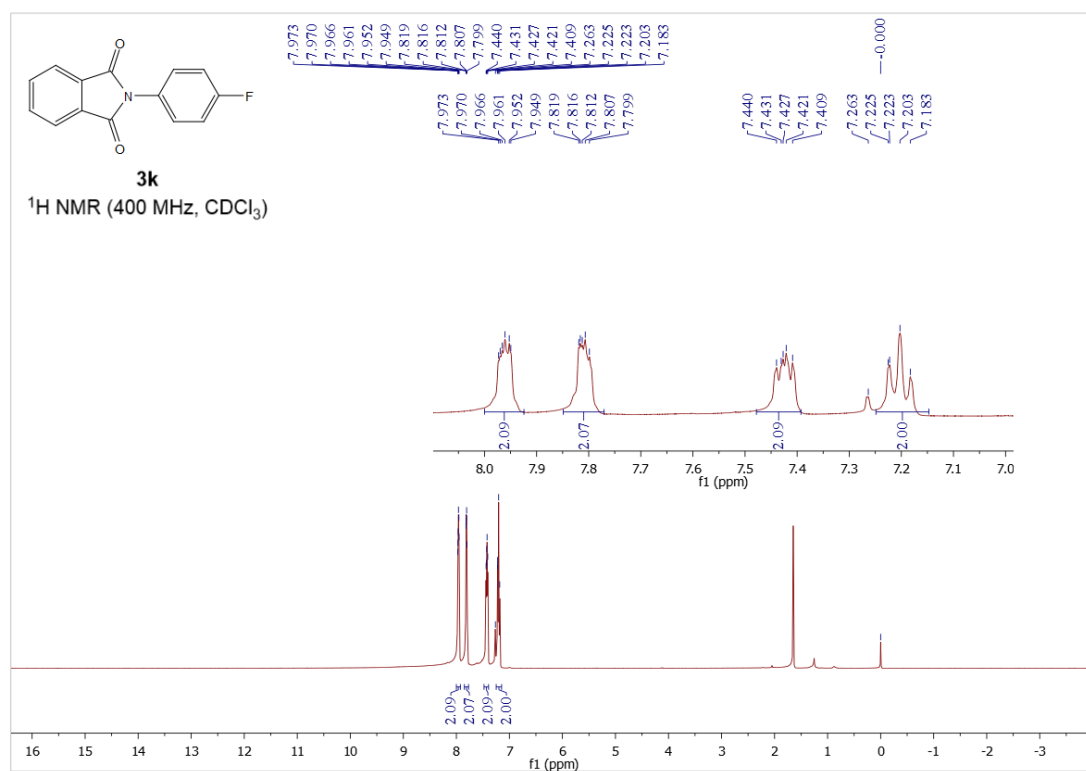

<sup>13</sup>C NMR of Compound **3k** (100 MHz, CDCl<sub>3</sub>)

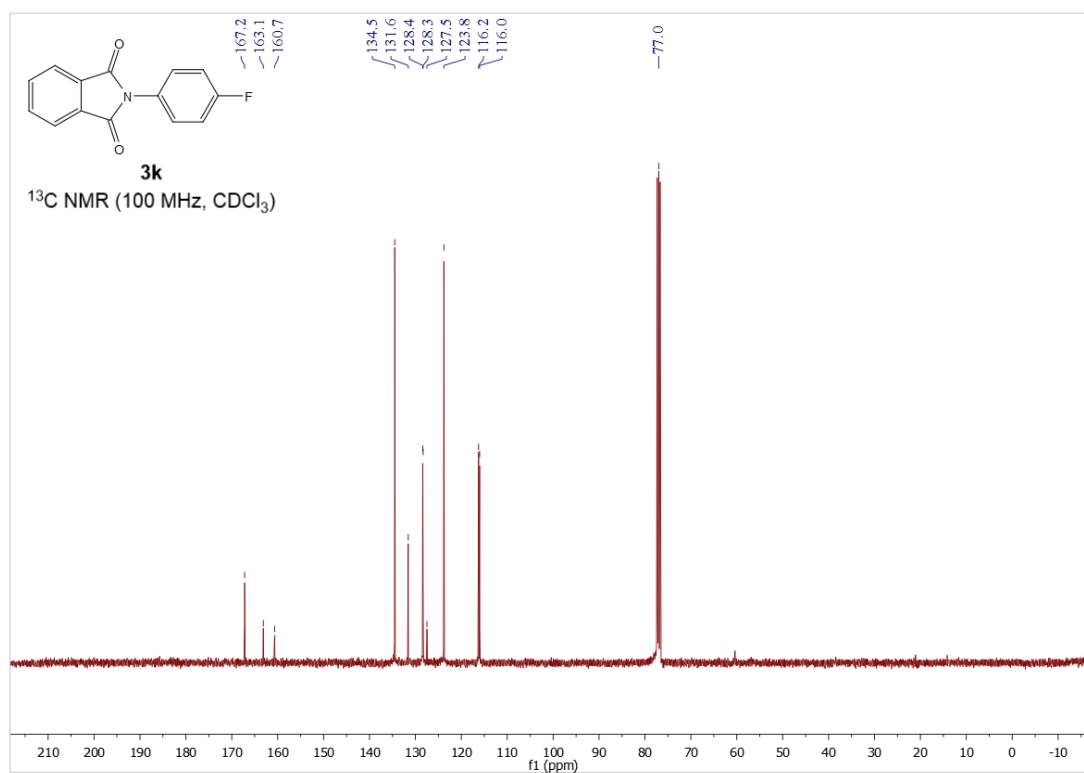

$^{19}\text{F}$  NMR of Compound **3k** (376 MHz,  $\text{CDCl}_3$ )

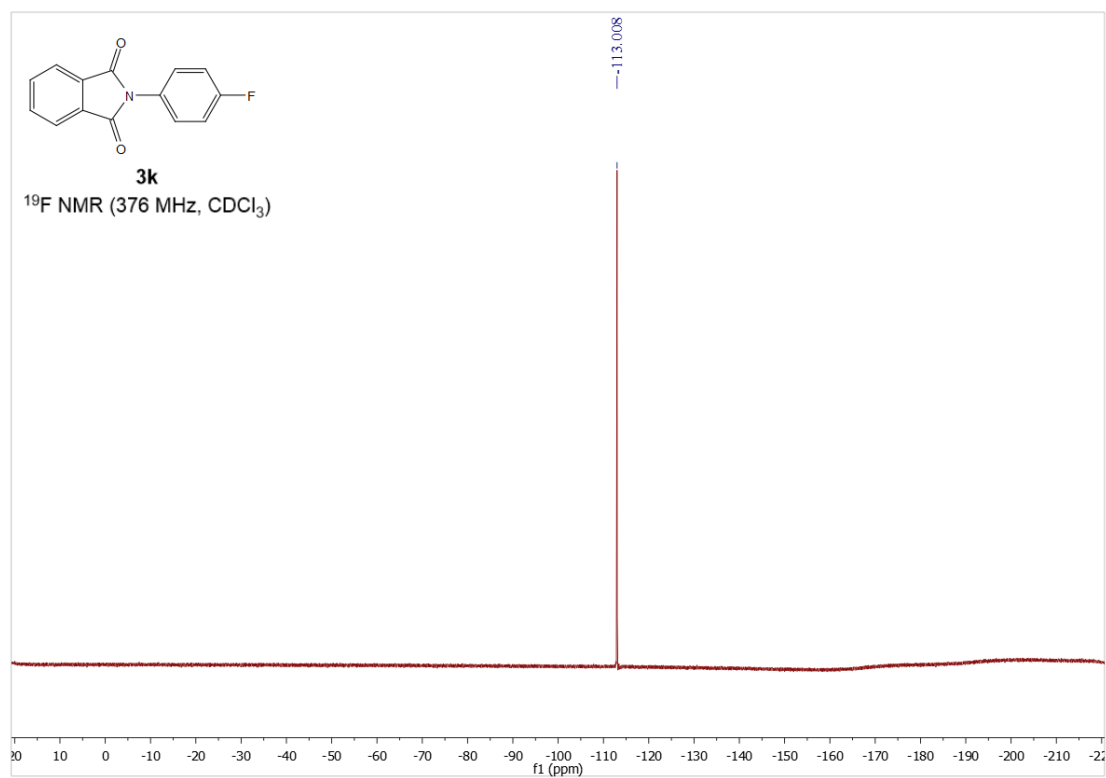

$^1\text{H}$  NMR of Compound **3l** (400 MHz,  $\text{CDCl}_3$ )

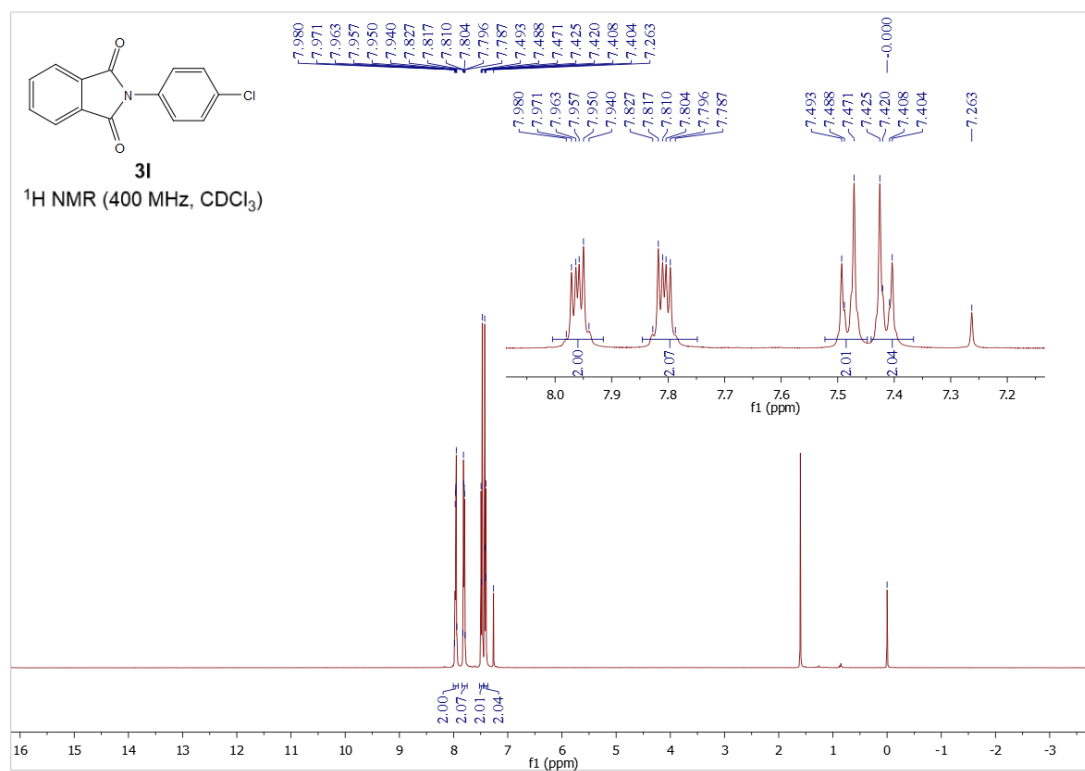

<sup>13</sup>C NMR of Compound **3l** (100 MHz, CDCl<sub>3</sub>)

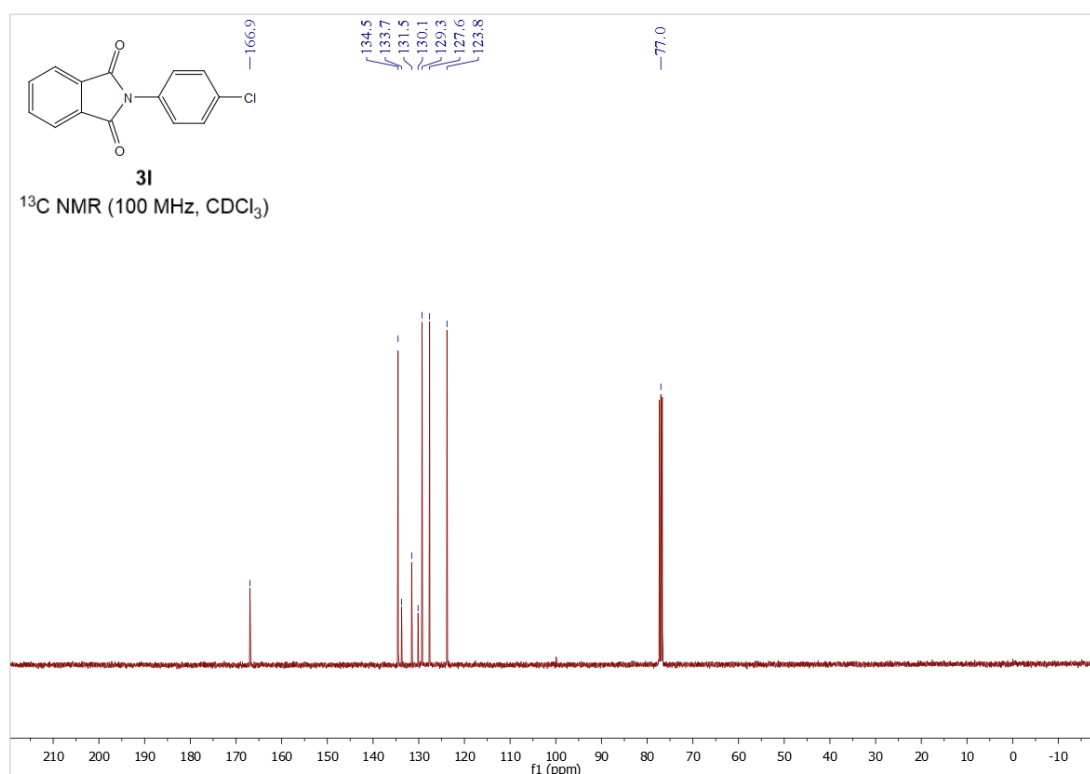

<sup>1</sup>H NMR of Compound **3m** (400 MHz, CDCl<sub>3</sub>)

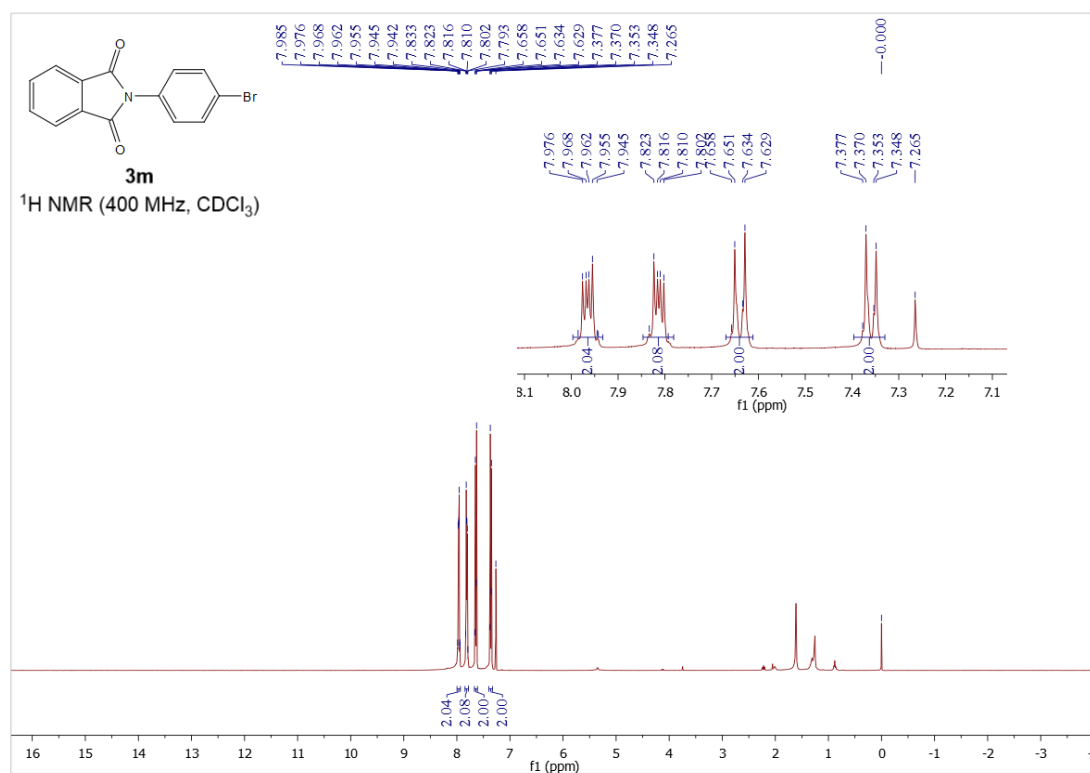

<sup>13</sup>C NMR of Compound **3m** (100 MHz, CDCl<sub>3</sub>)

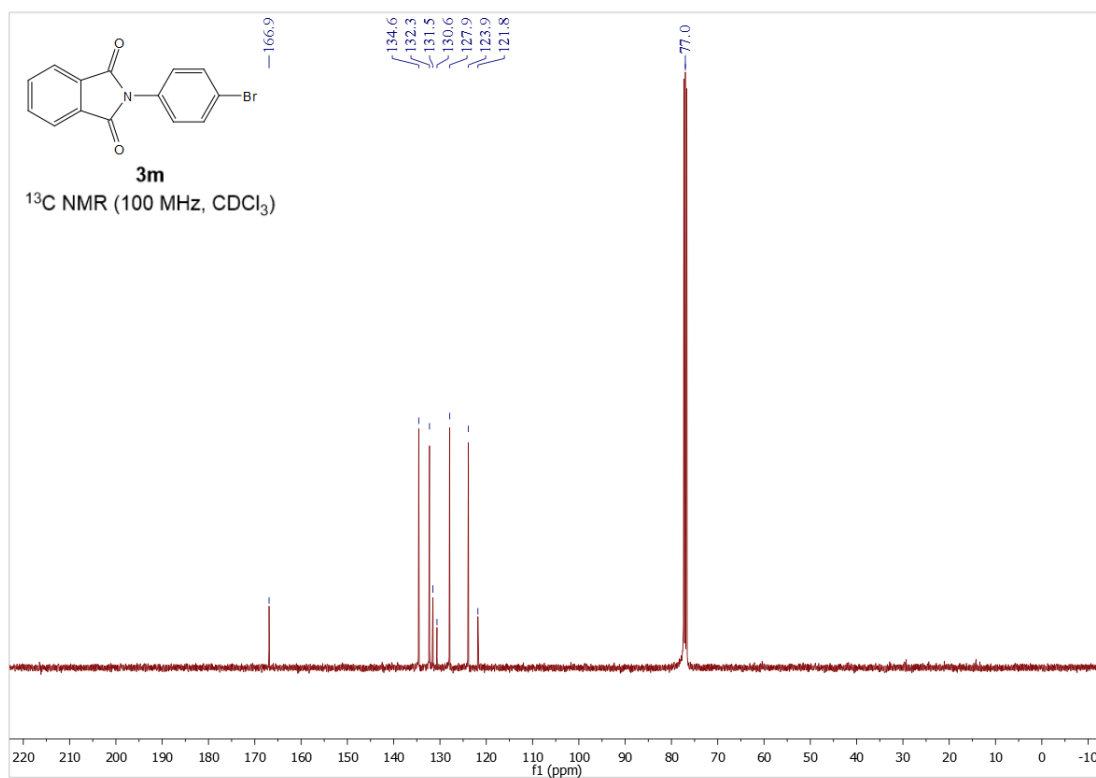

<sup>1</sup>H NMR of Compound **3n** (400 MHz, CDCl<sub>3</sub>)

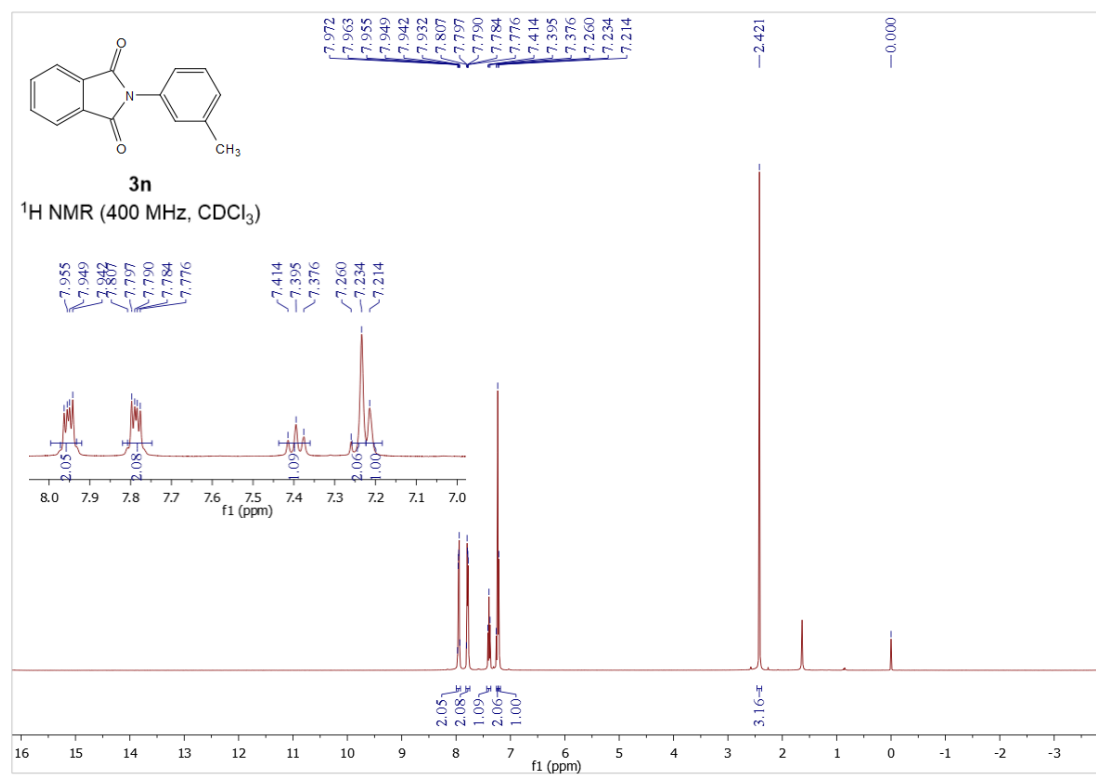

<sup>13</sup>C NMR of Compound **3n** (100 MHz, CDCl<sub>3</sub>)

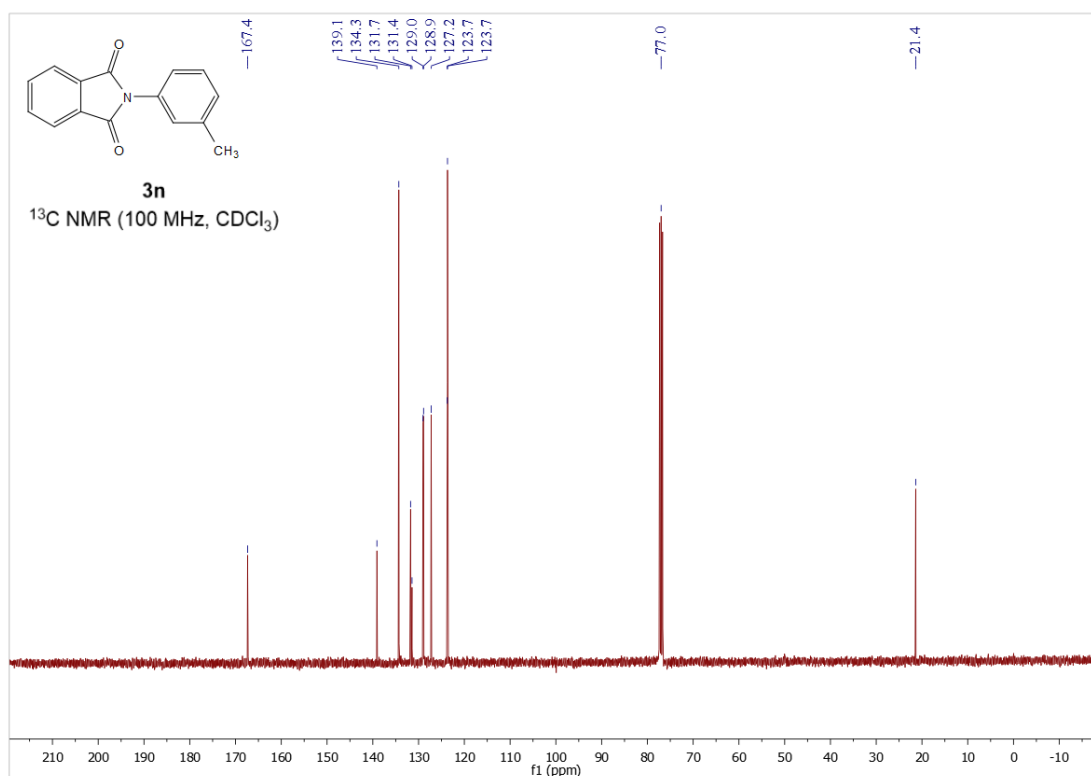

<sup>1</sup>H NMR of Compound **3o** (400 MHz, CDCl<sub>3</sub>)

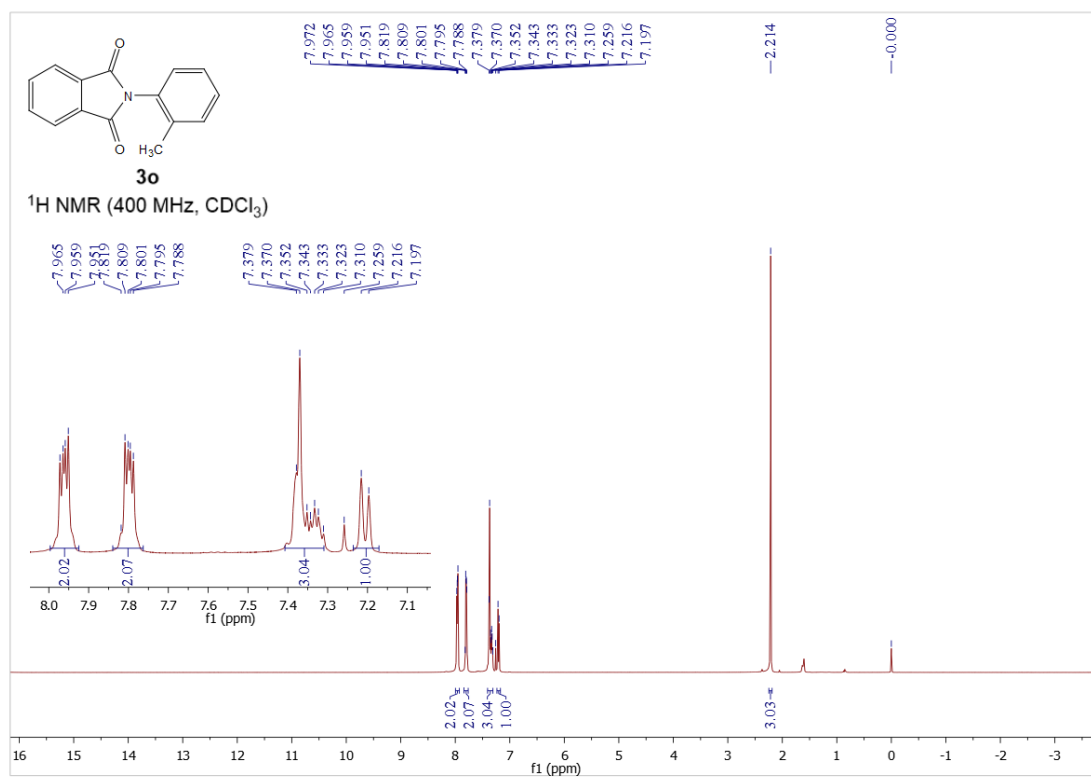

<sup>13</sup>C NMR of Compound **3o** (100 MHz, CDCl<sub>3</sub>)

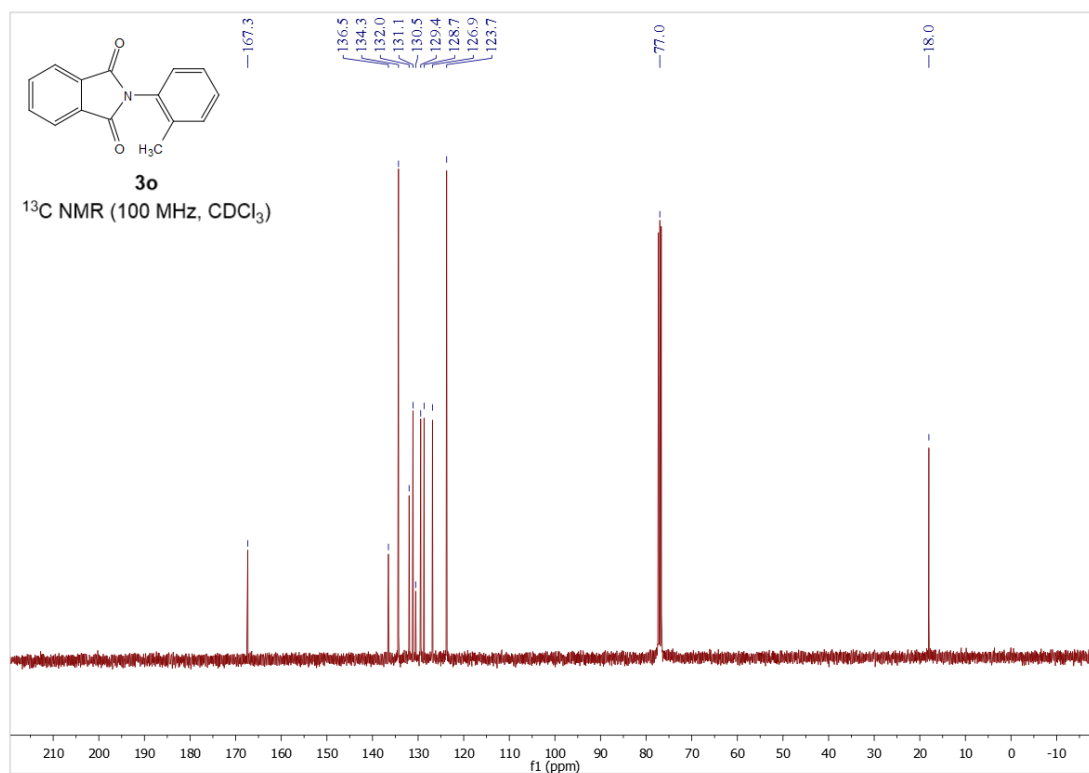

<sup>1</sup>H NMR of Compound **3p** (400 MHz, CDCl<sub>3</sub>)

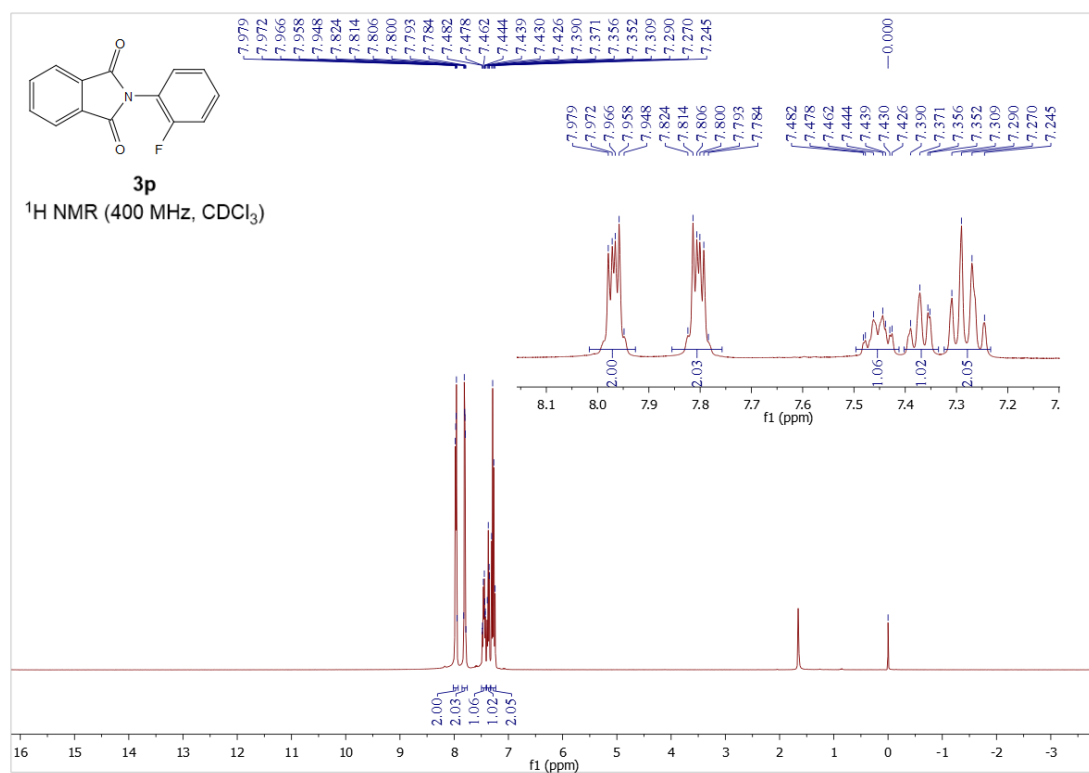

<sup>13</sup>C NMR of Compound **3p** (100 MHz, CDCl<sub>3</sub>)

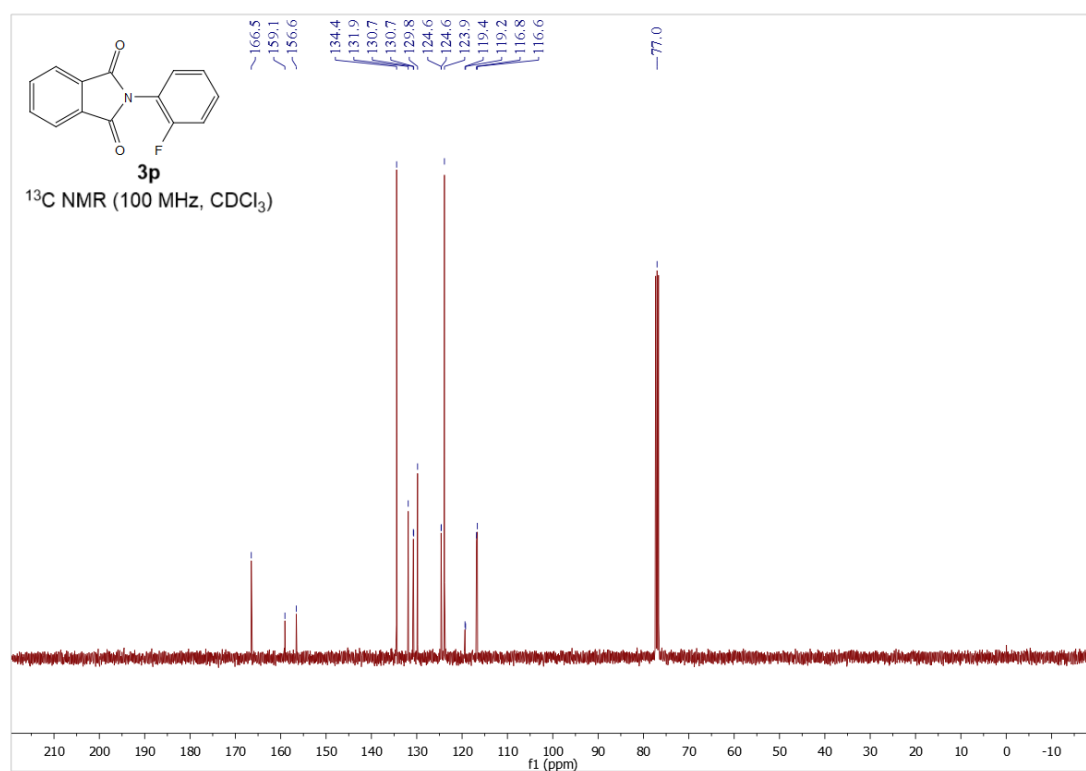

<sup>19</sup>F NMR of Compound **3p** (376 MHz, CDCl<sub>3</sub>)

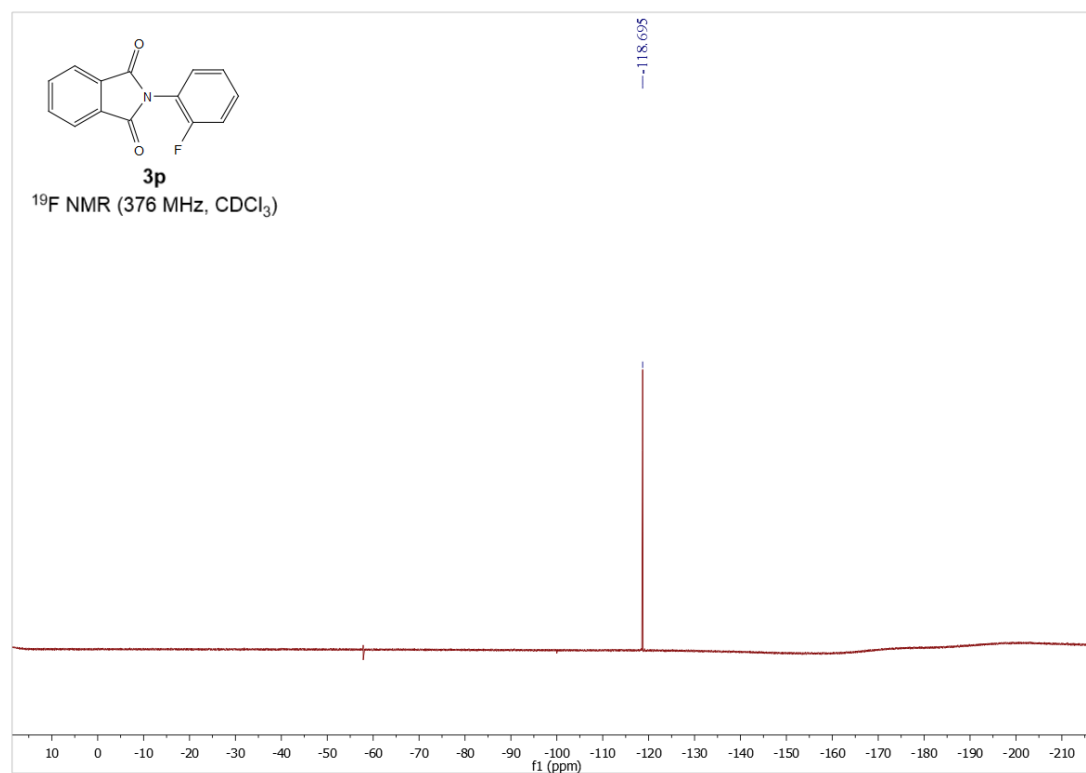

<sup>1</sup>H NMR of Compound **3q** (400 MHz, CDCl<sub>3</sub>)

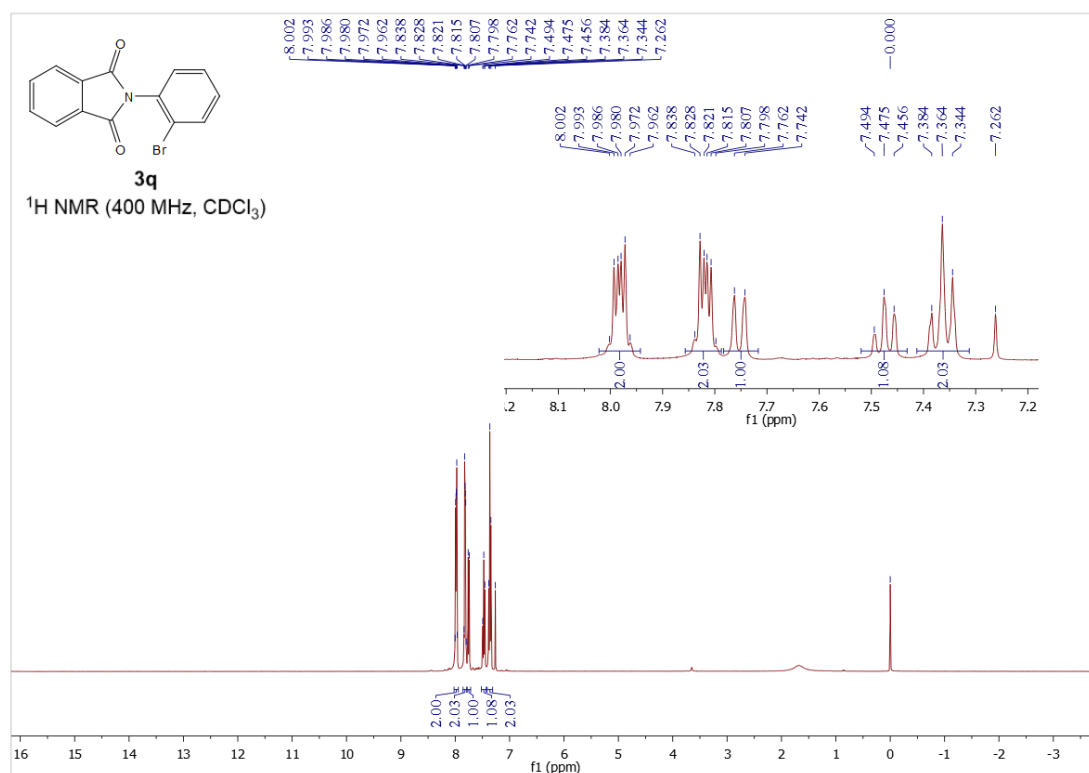

<sup>13</sup>C NMR of Compound **3q** (100 MHz, CDCl<sub>3</sub>)

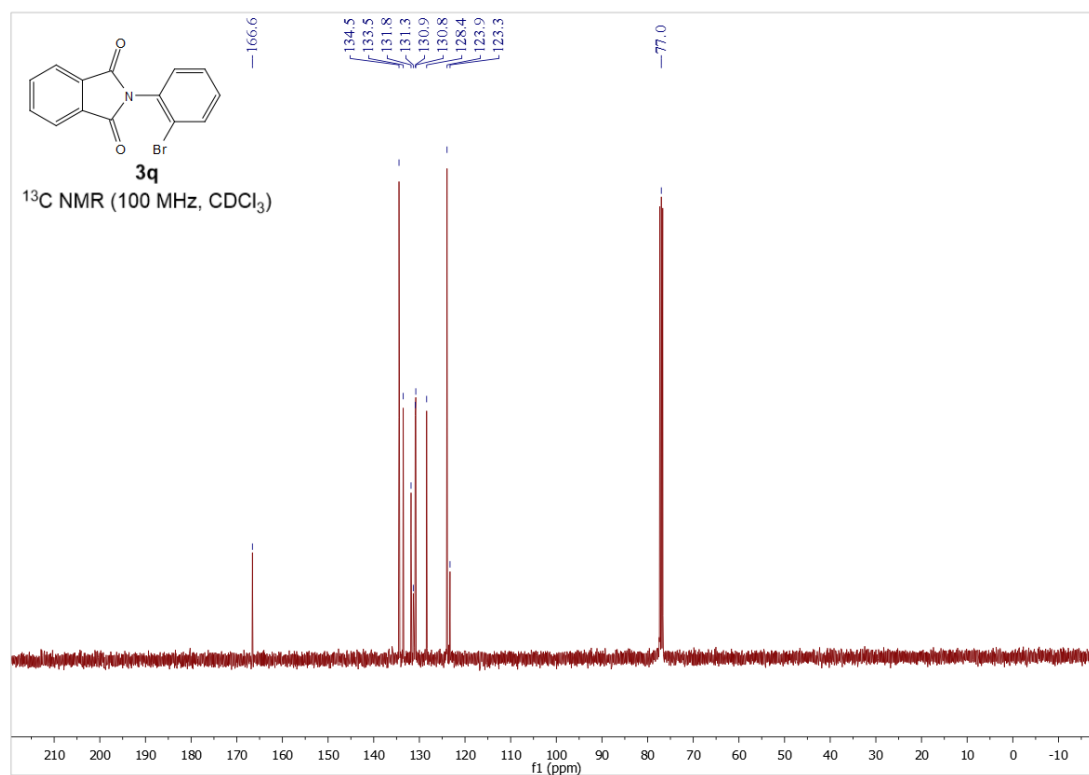



<sup>1</sup>H NMR of Compound **3r** (400 MHz, CDCl<sub>3</sub>)

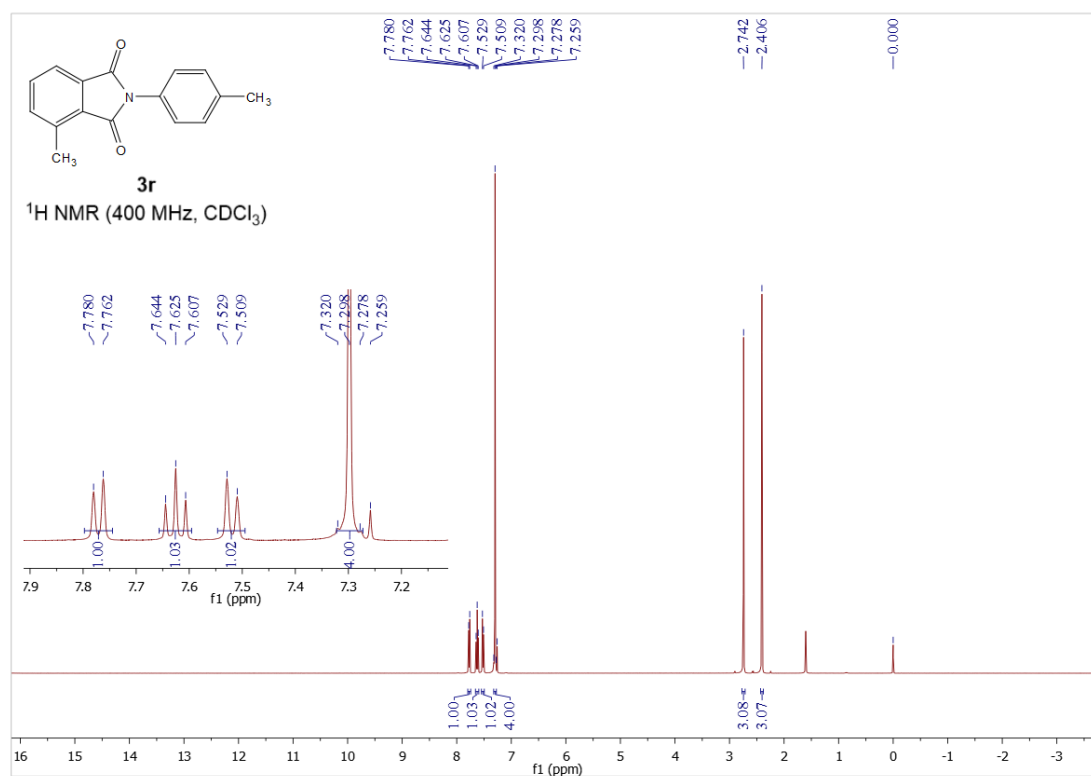

<sup>13</sup>C NMR of Compound **3r** (100 MHz, CDCl<sub>3</sub>)

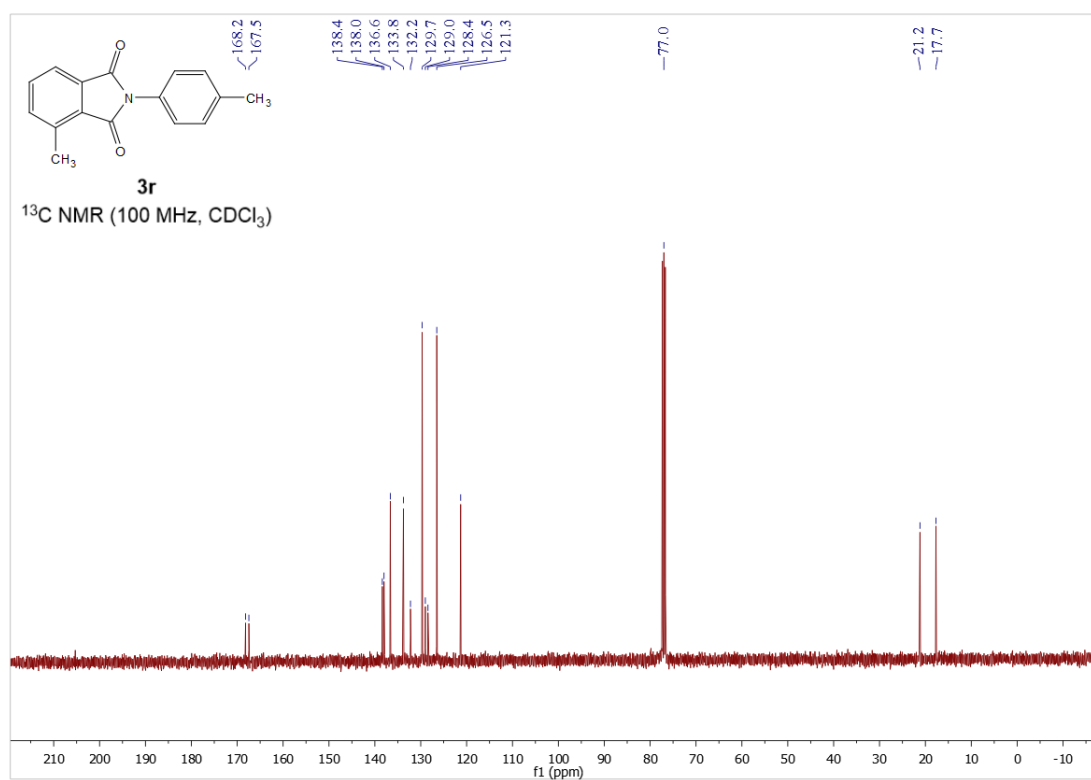

<sup>1</sup>H NMR of Compound **3s** (400 MHz, CDCl<sub>3</sub>)

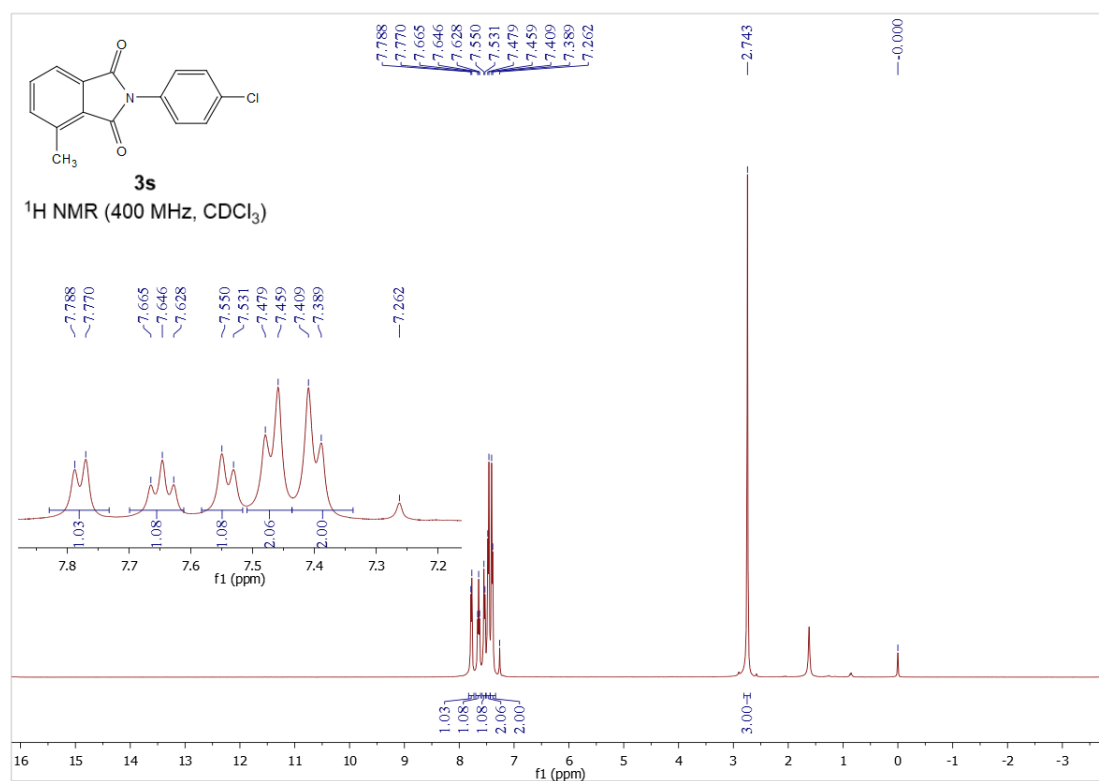

<sup>13</sup>C NMR of Compound **3s** (100 MHz, CDCl<sub>3</sub>)

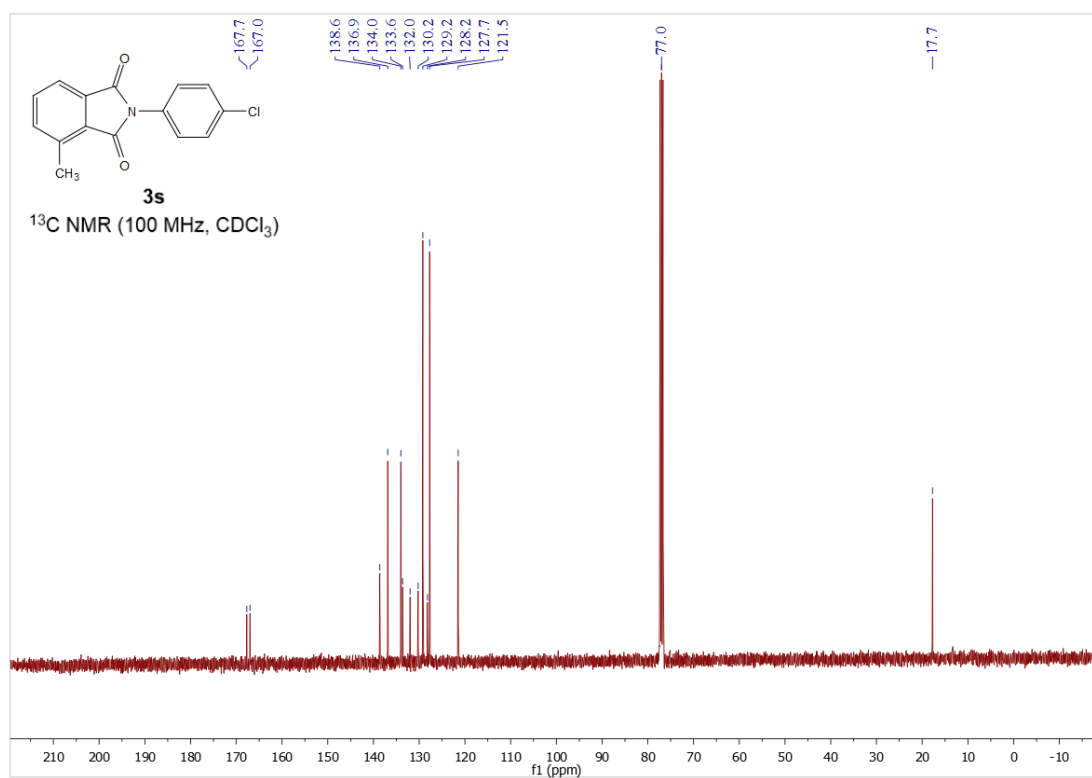

<sup>1</sup>H NMR of Compound **3t** (400 MHz, CDCl<sub>3</sub>)

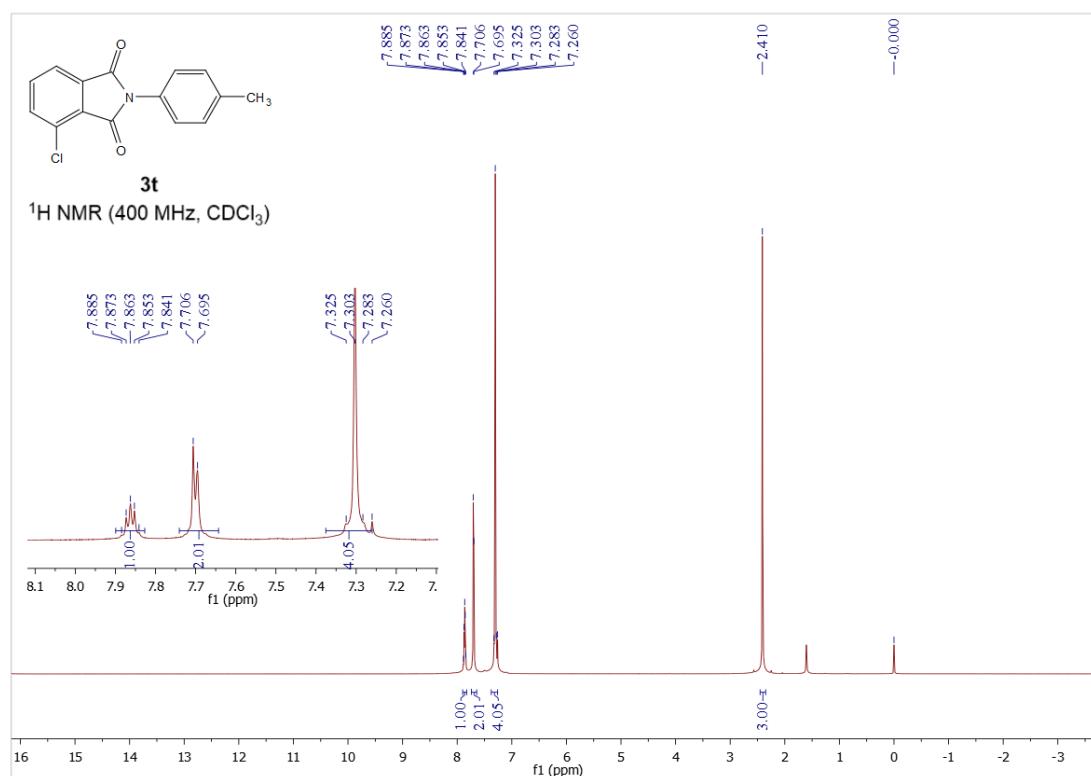

<sup>13</sup>C NMR of Compound **3t** (100 MHz, CDCl<sub>3</sub>)

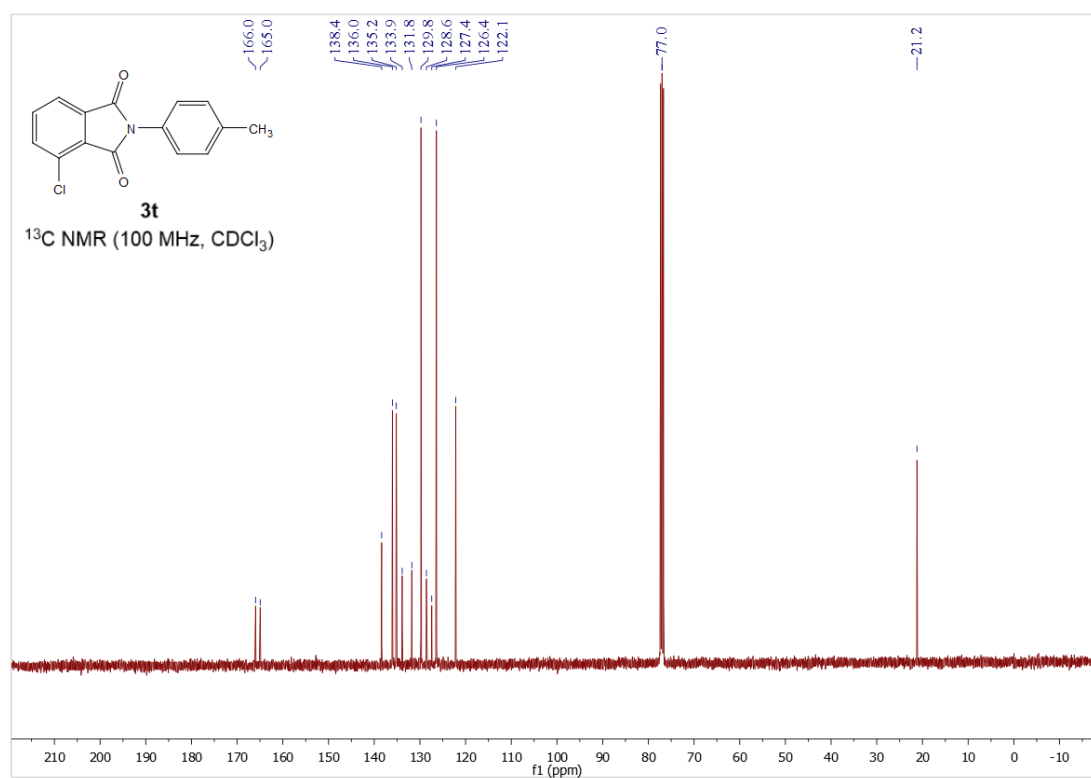

<sup>1</sup>H NMR of Compound **3u** (400 MHz, CDCl<sub>3</sub>)

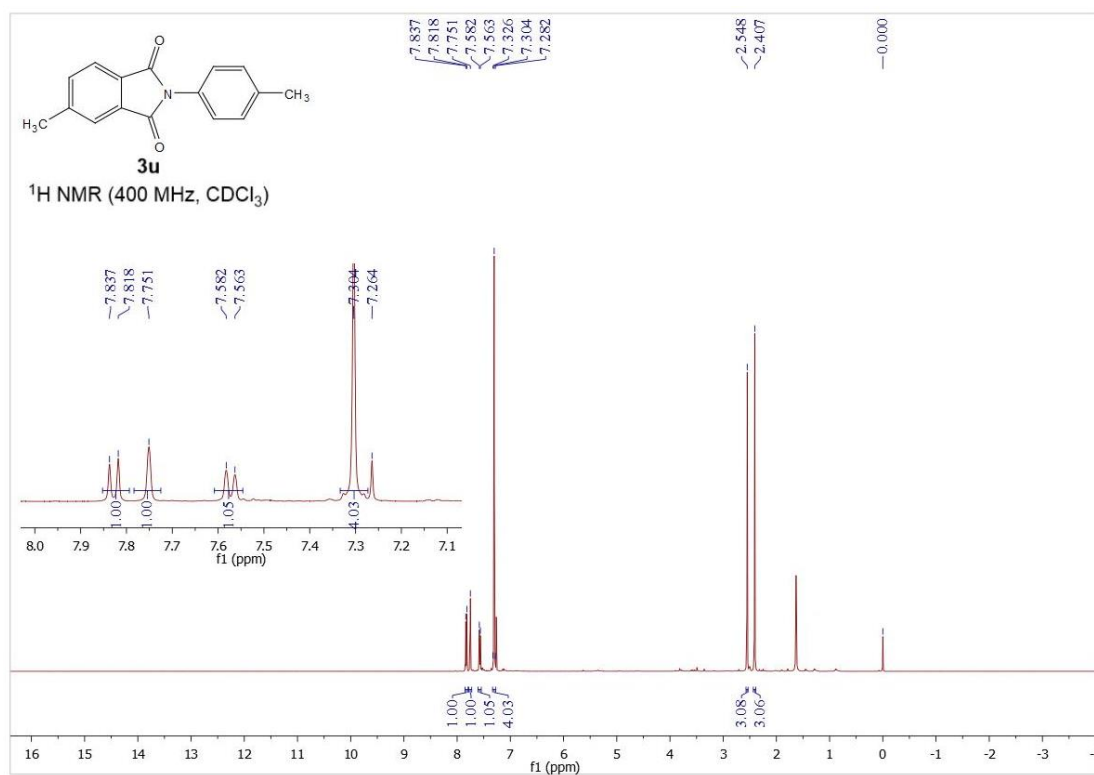

<sup>13</sup>C NMR of Compound **3u** (100 MHz, CDCl<sub>3</sub>)

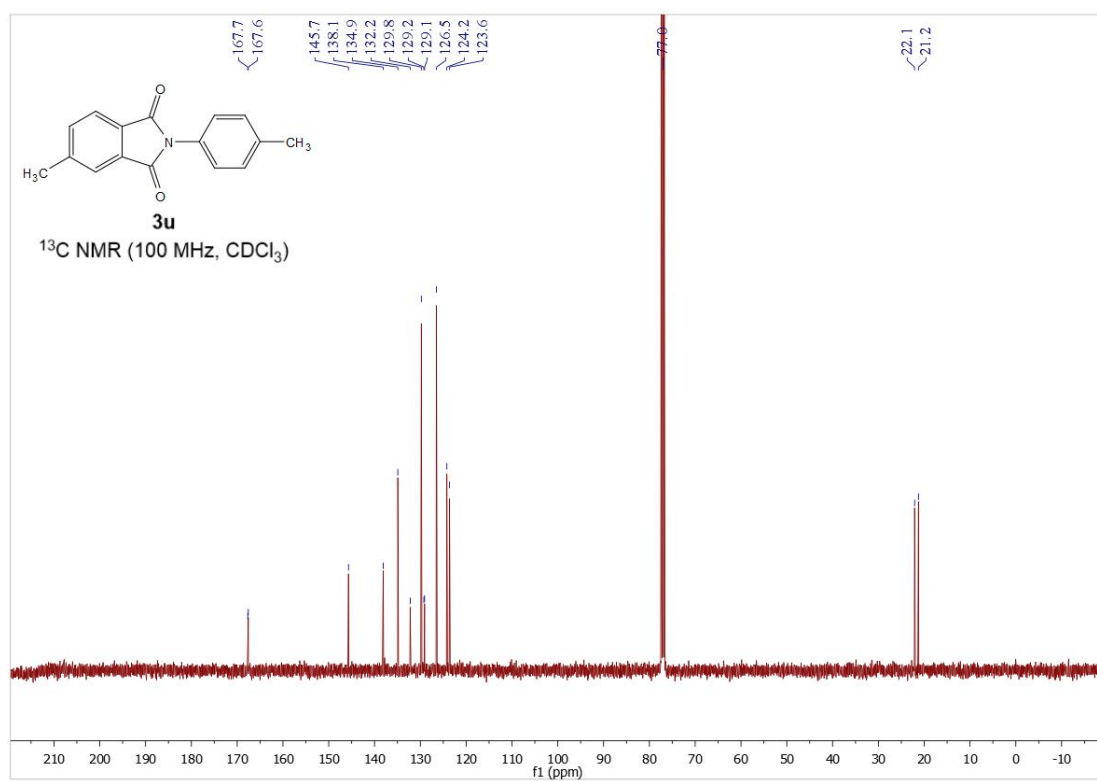

<sup>1</sup>H NMR of Compound **3v** (400 MHz, CDCl<sub>3</sub>)

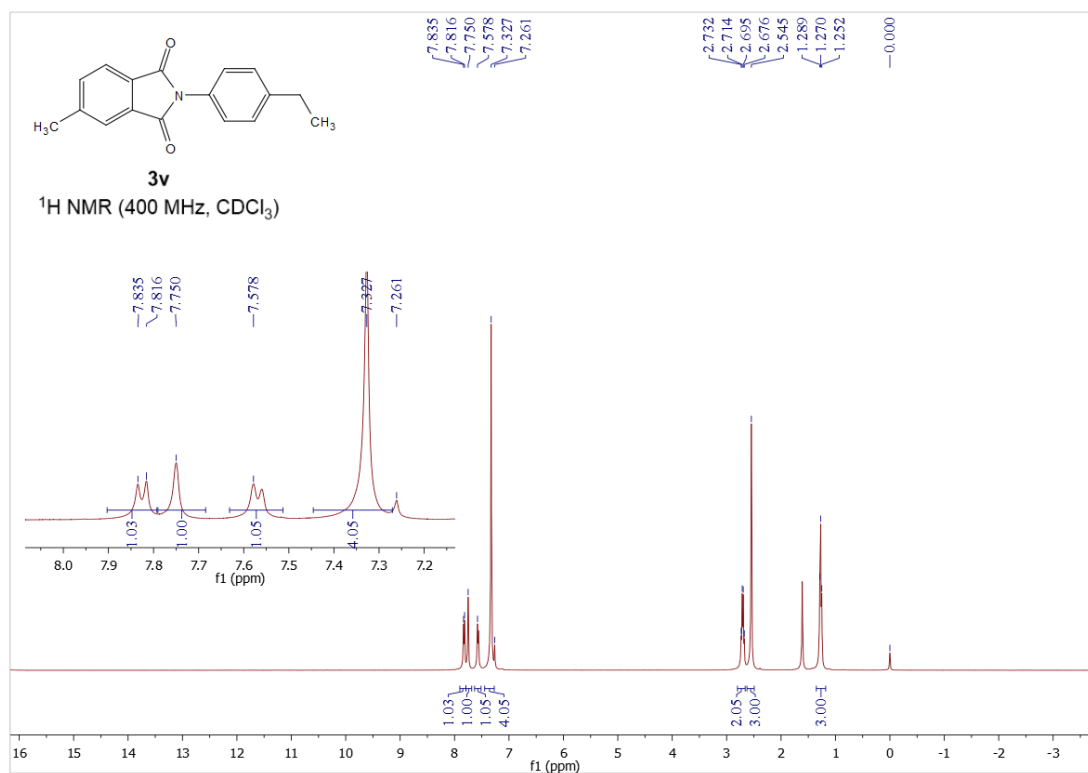

<sup>13</sup>C NMR of Compound **3v** (100 MHz, CDCl<sub>3</sub>)

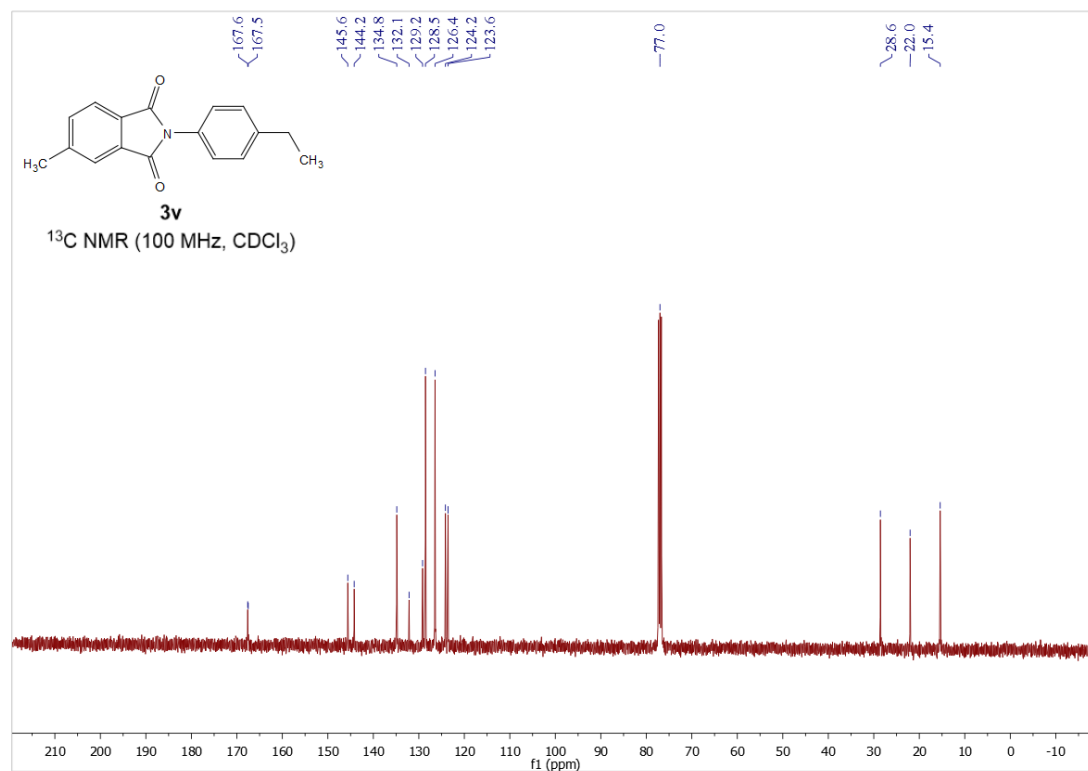

<sup>1</sup>H NMR of Compound **3w** (400 MHz, CDCl<sub>3</sub>)

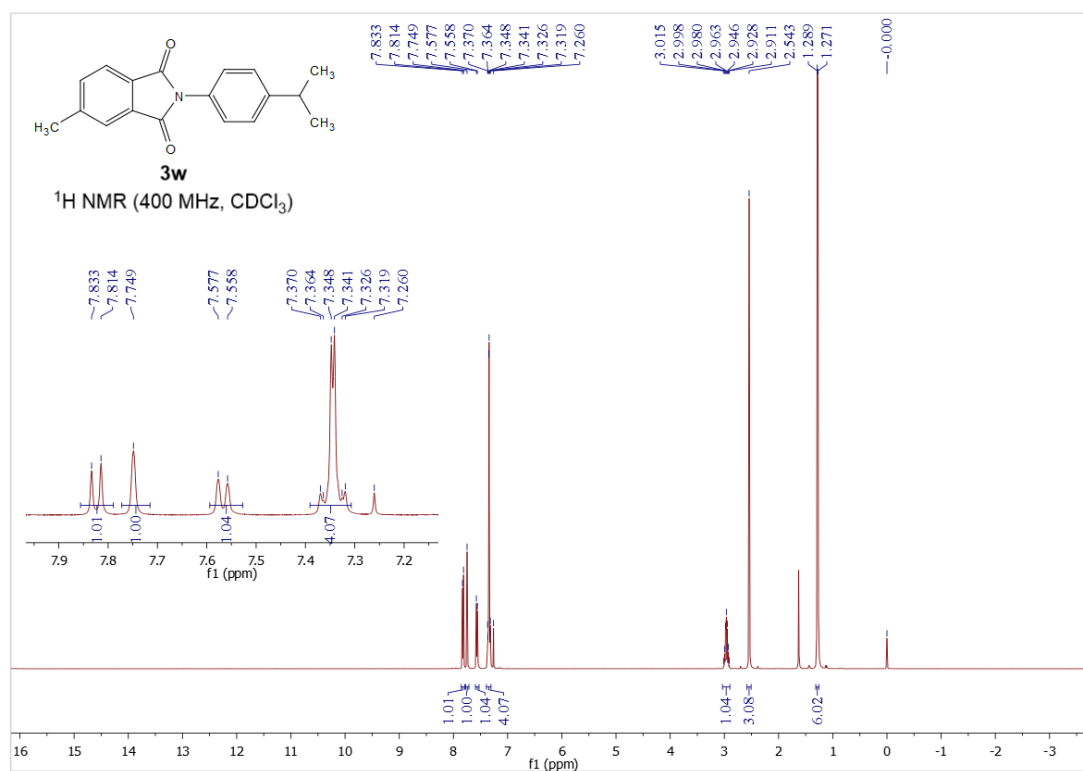

<sup>13</sup>C NMR of Compound **3w** (100 MHz, CDCl<sub>3</sub>)

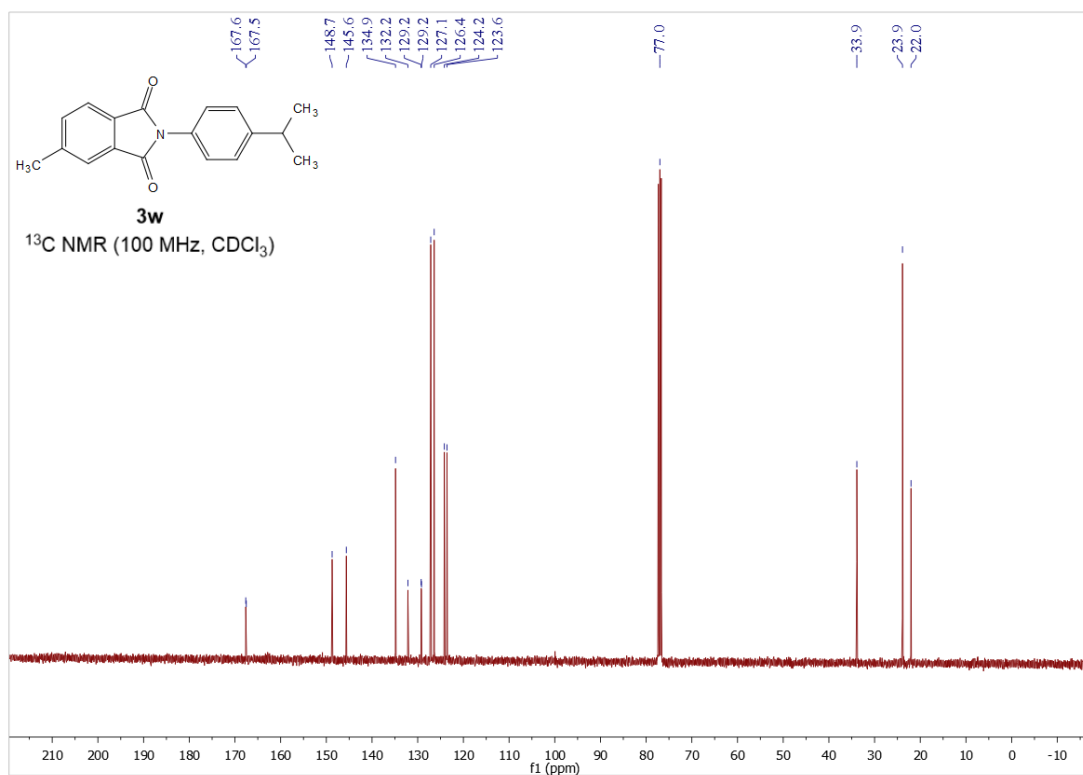

<sup>1</sup>H NMR of Compound **3x** (400 MHz, CDCl<sub>3</sub>)

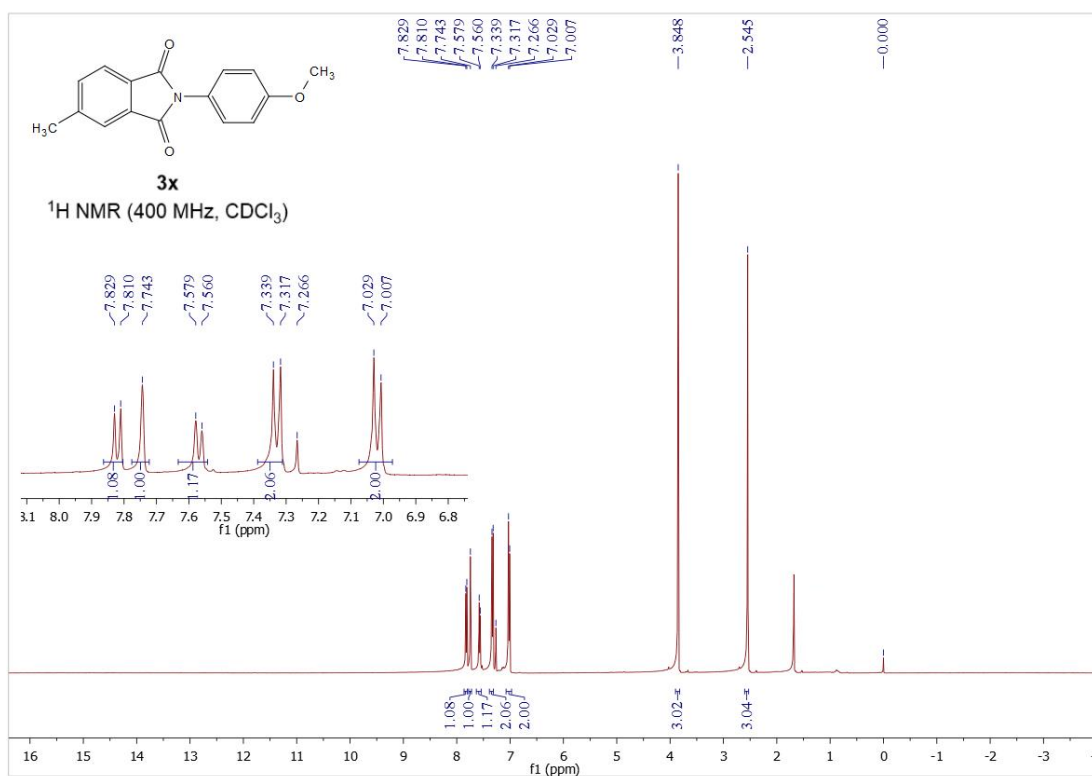

<sup>13</sup>C NMR of Compound **3x** (100 MHz, CDCl<sub>3</sub>)

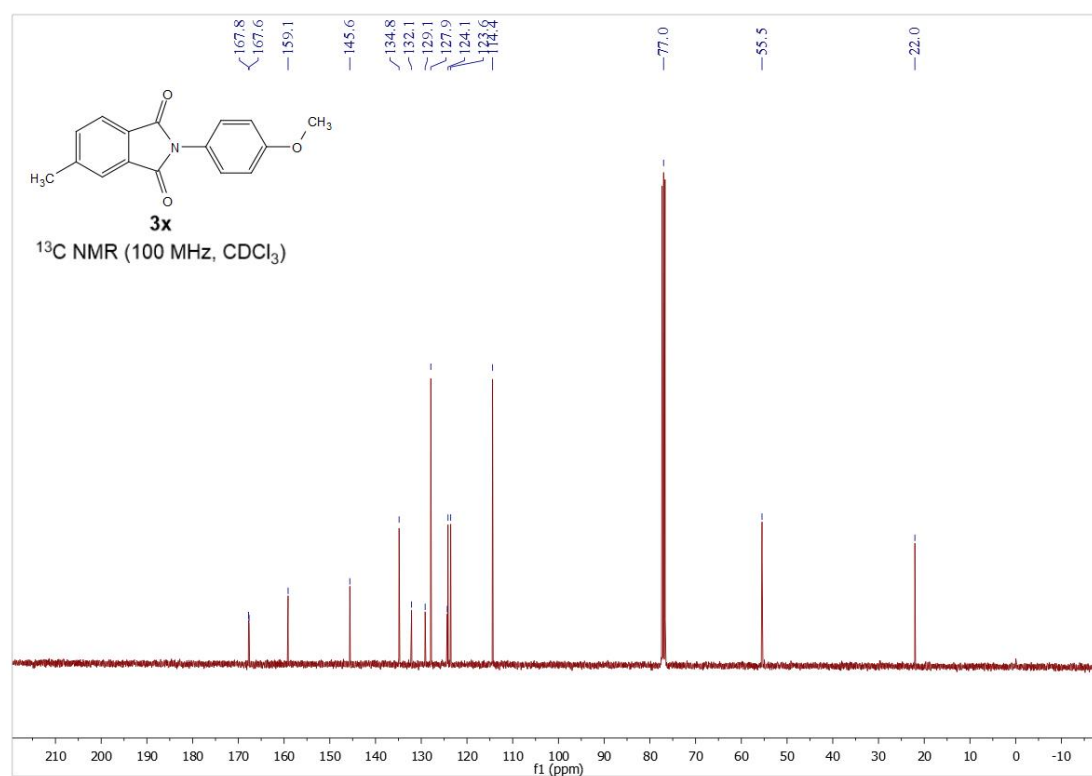

<sup>1</sup>H NMR of Compound **3y** (400 MHz, CDCl<sub>3</sub>)

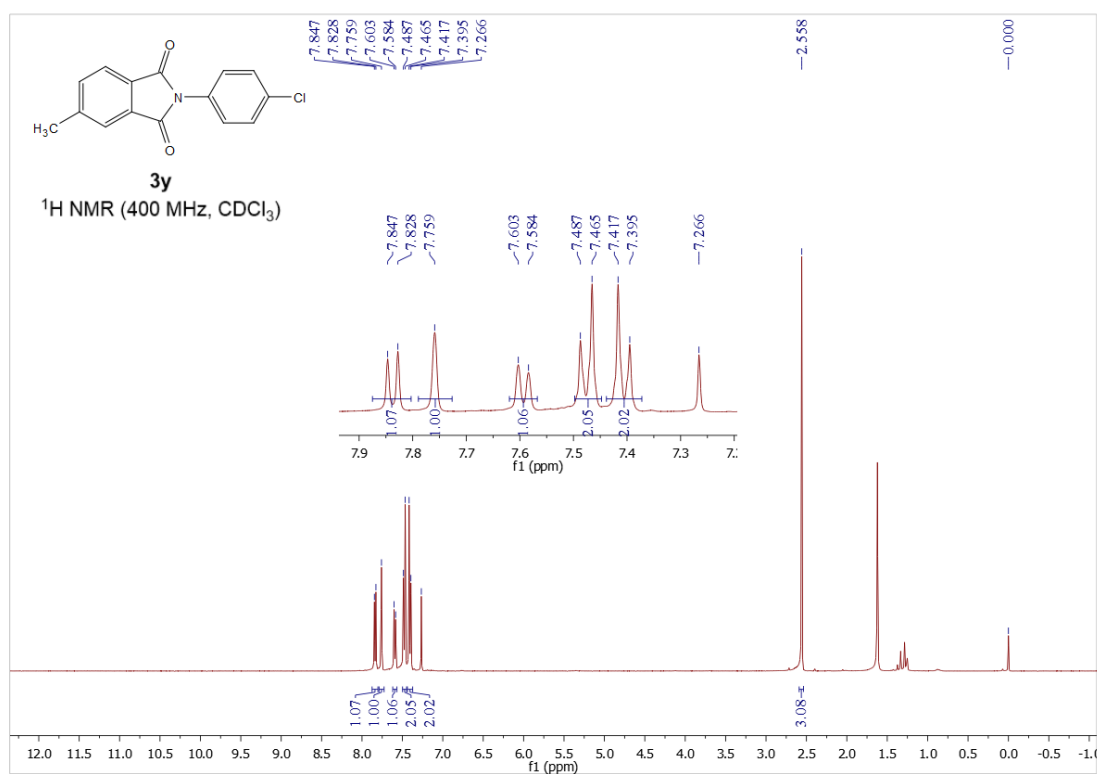

<sup>13</sup>C NMR of Compound **3y** (100 MHz, CDCl<sub>3</sub>)

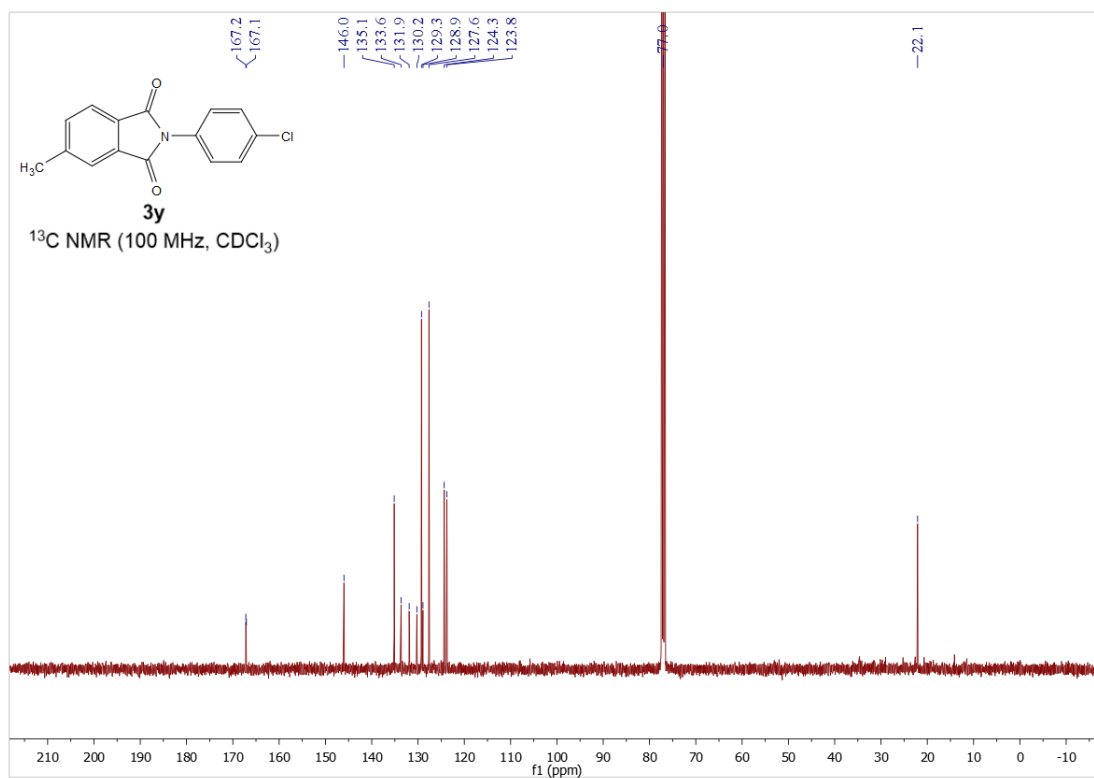



<sup>1</sup>H NMR of Compound **3z** (400 MHz, CDCl<sub>3</sub>)

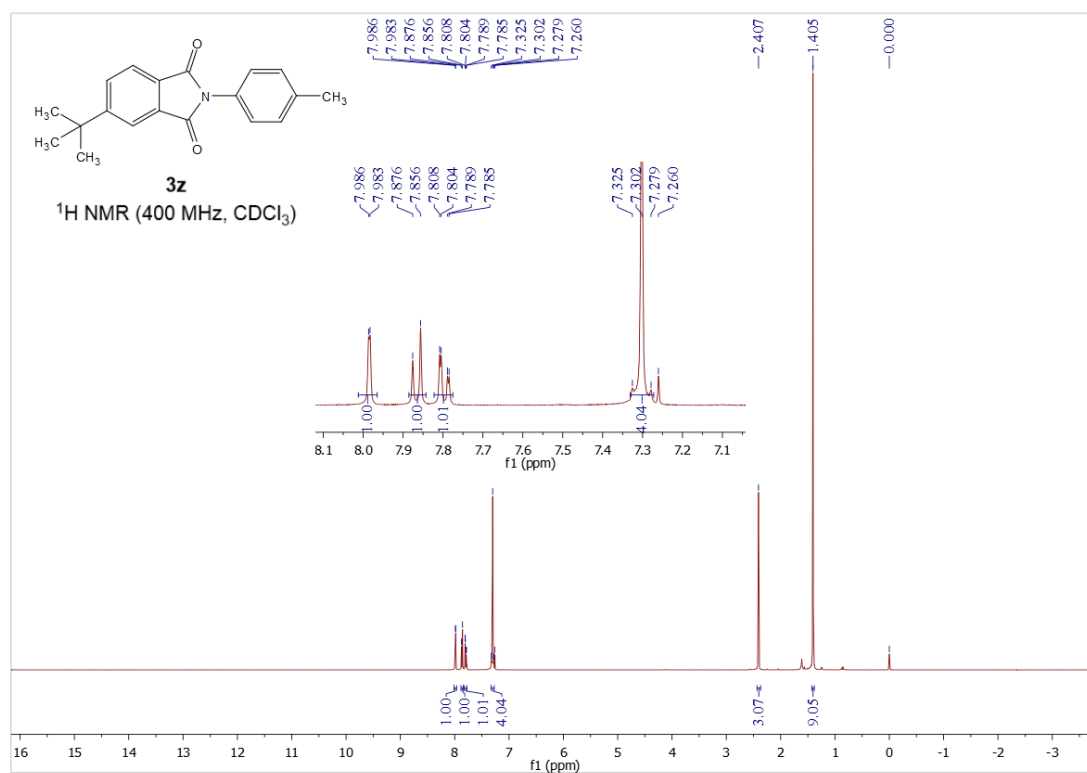

<sup>13</sup>C NMR of Compound **3z** (100 MHz, CDCl<sub>3</sub>)

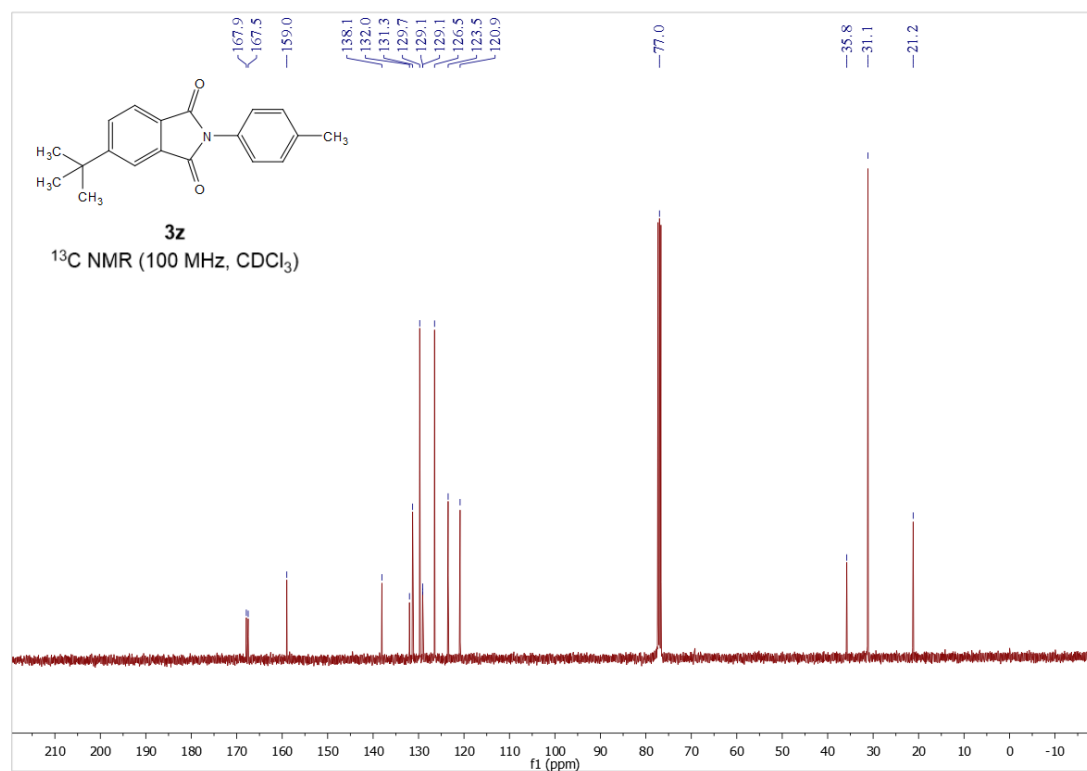

<sup>1</sup>H NMR of Compound **3a'** (400 MHz, CDCl<sub>3</sub>)

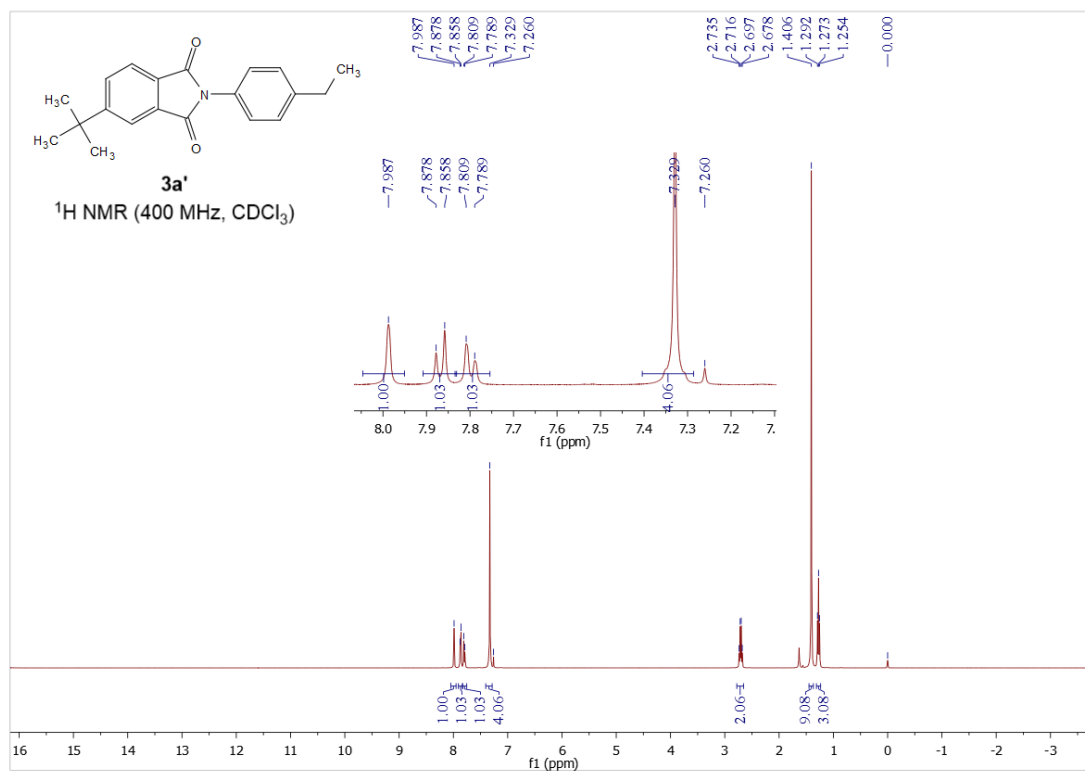

<sup>13</sup>C NMR of Compound **3a'** (100 MHz, CDCl<sub>3</sub>)

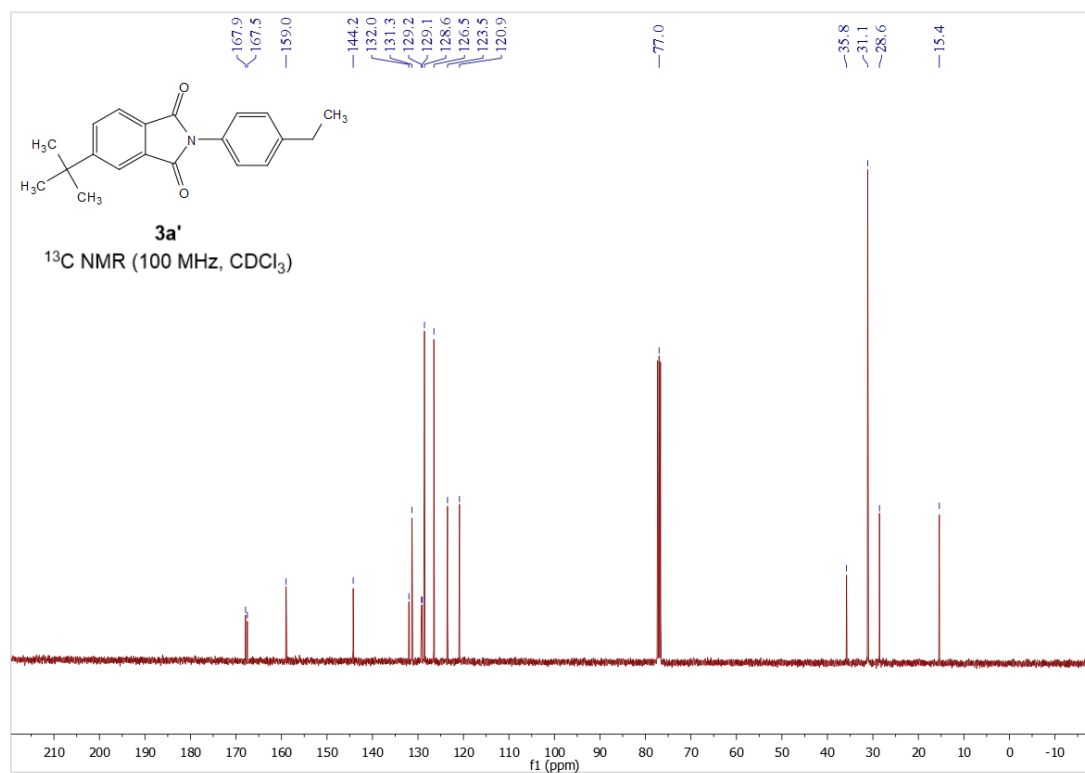

<sup>1</sup>H NMR of Compound **3b'** (400 MHz, CDCl<sub>3</sub>)

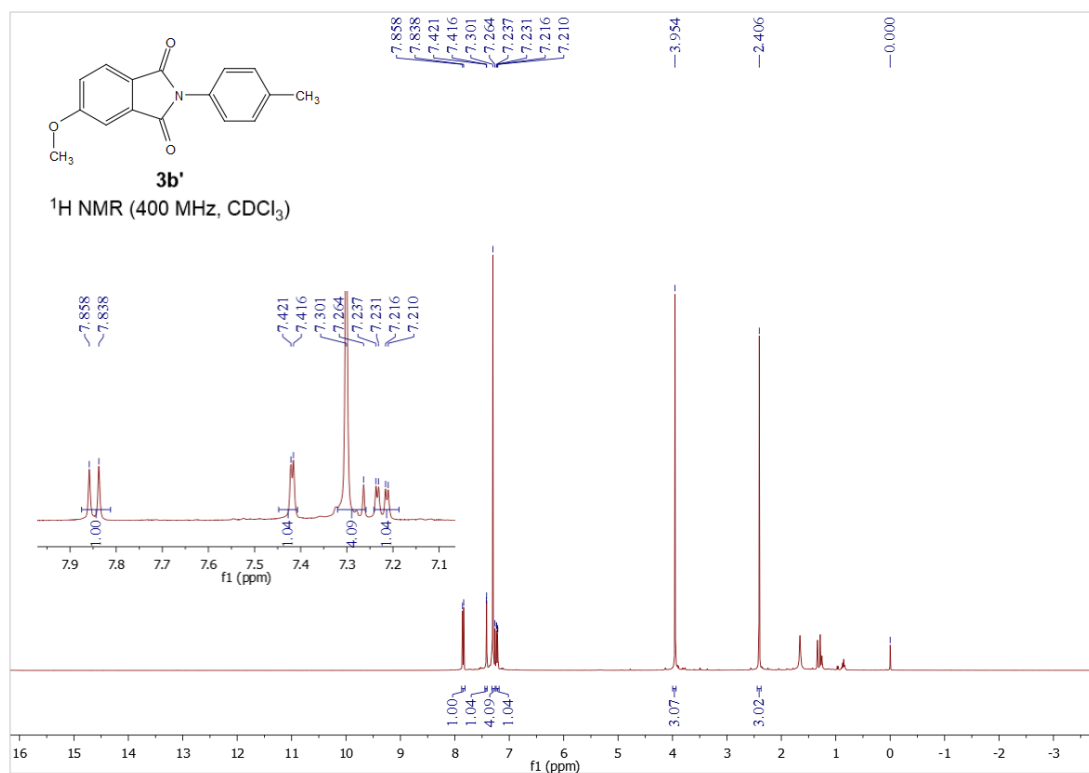

<sup>13</sup>C NMR of Compound **3b'** (100 MHz, CDCl<sub>3</sub>)

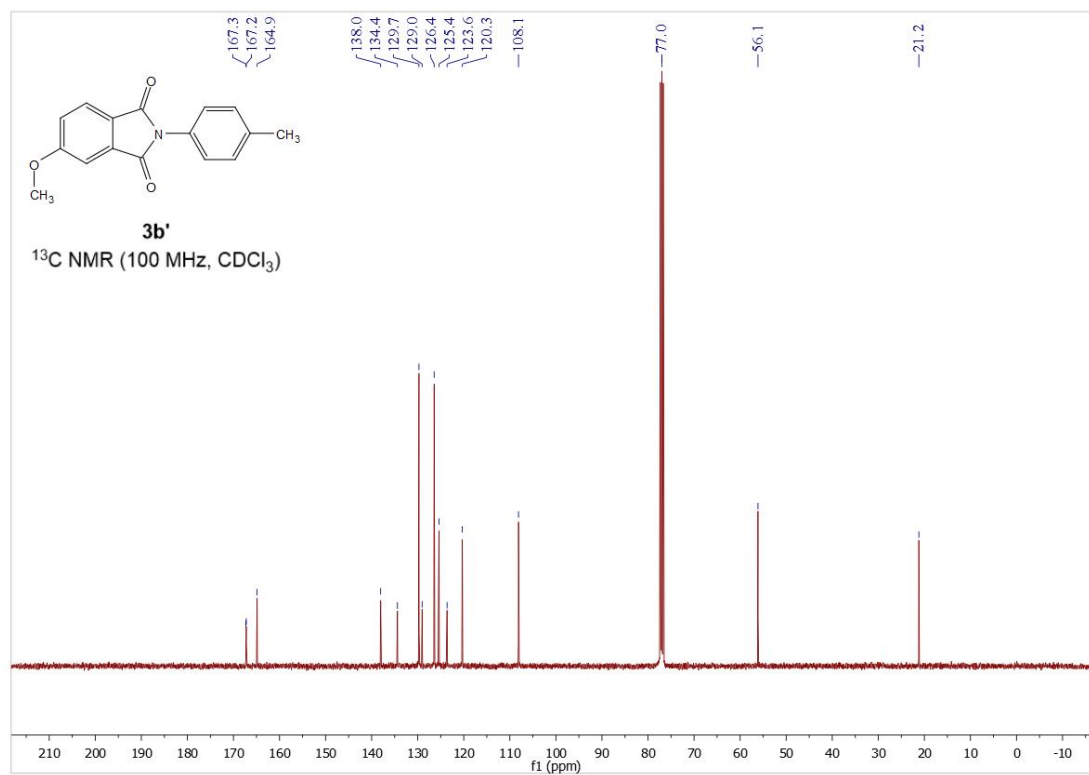

<sup>1</sup>H NMR of Compound **3c'** (400 MHz, CDCl<sub>3</sub>)

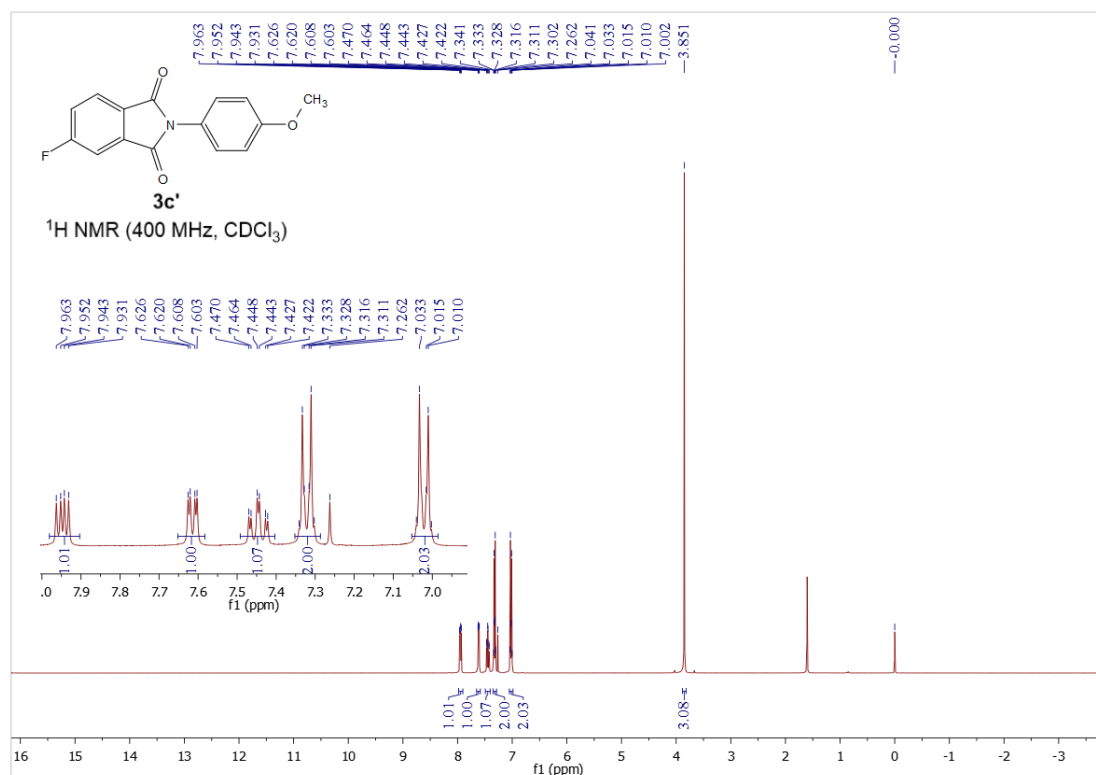

<sup>13</sup>C NMR of Compound **3c'** (100 MHz, CDCl<sub>3</sub>)

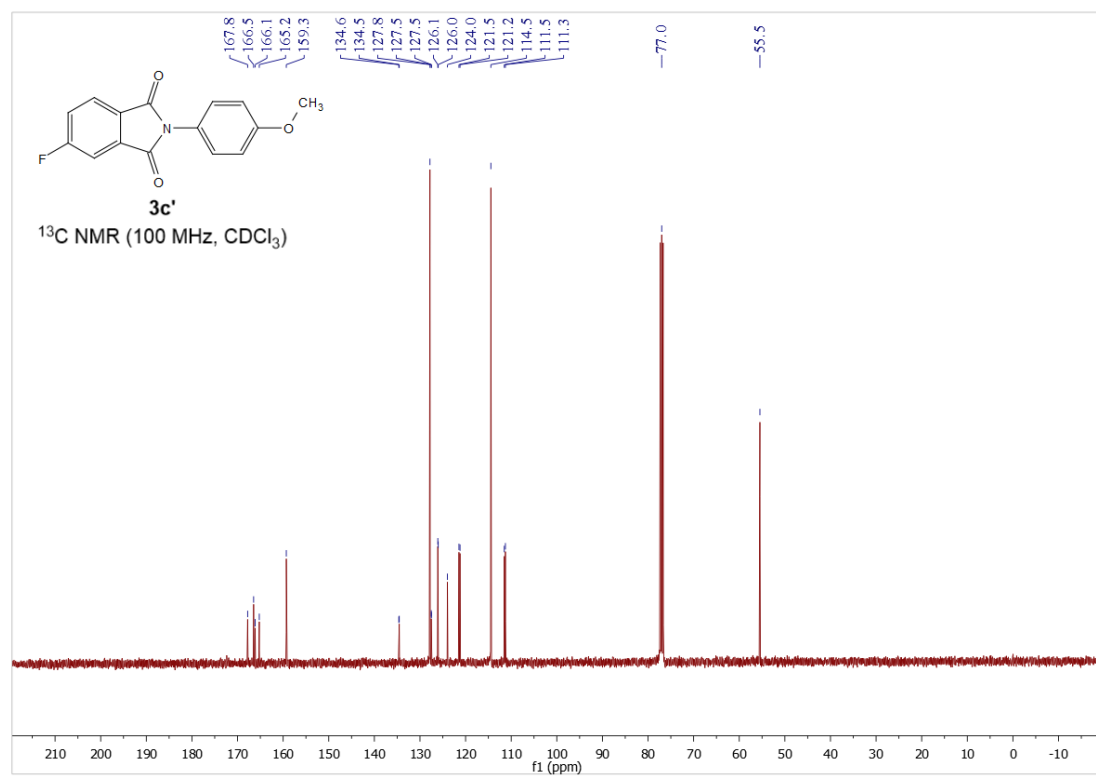

$^{19}\text{F}$  NMR of Compound **3c'** (376 MHz,  $\text{CDCl}_3$ )

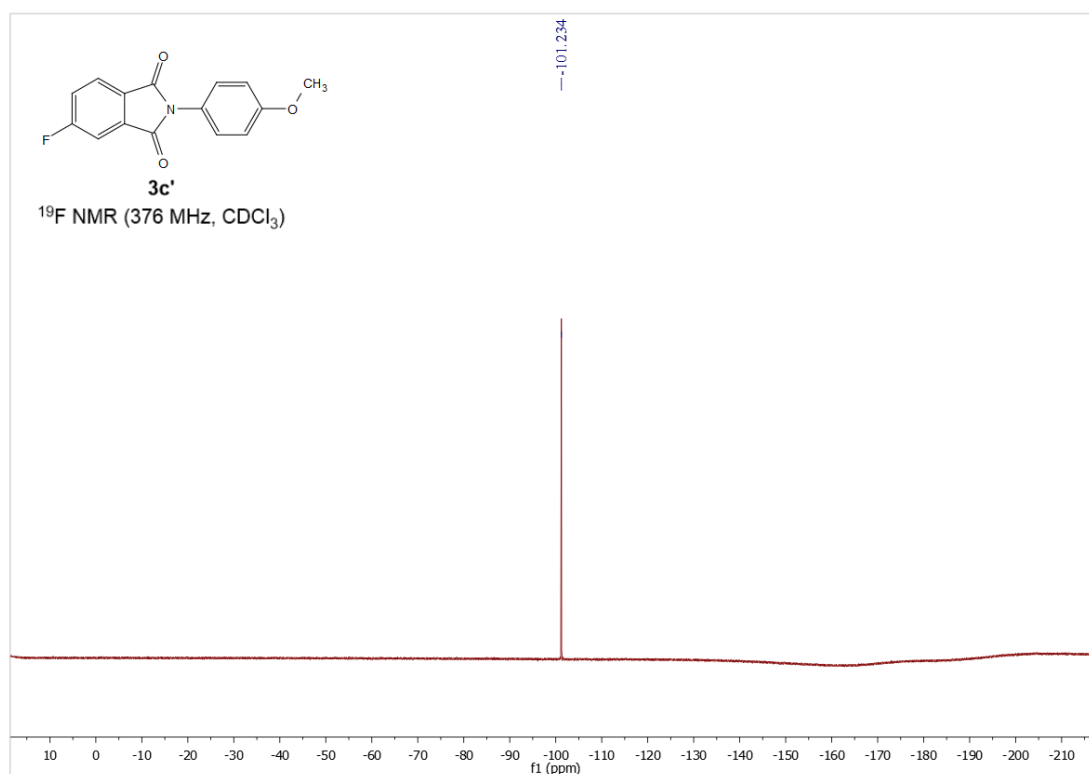

$^1\text{H}$  NMR of Compound **3d'** (400 MHz,  $\text{CDCl}_3$ )

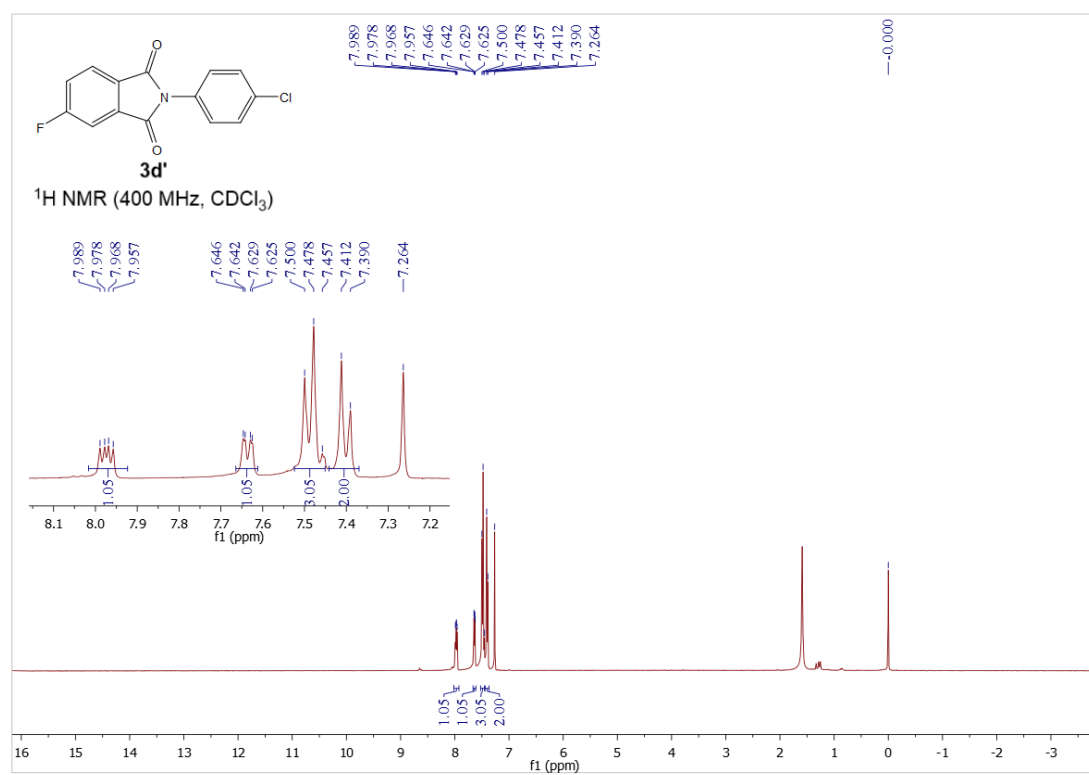

$^{13}\text{C}$  NMR of Compound **3d'** (100 MHz,  $\text{CDCl}_3$ )

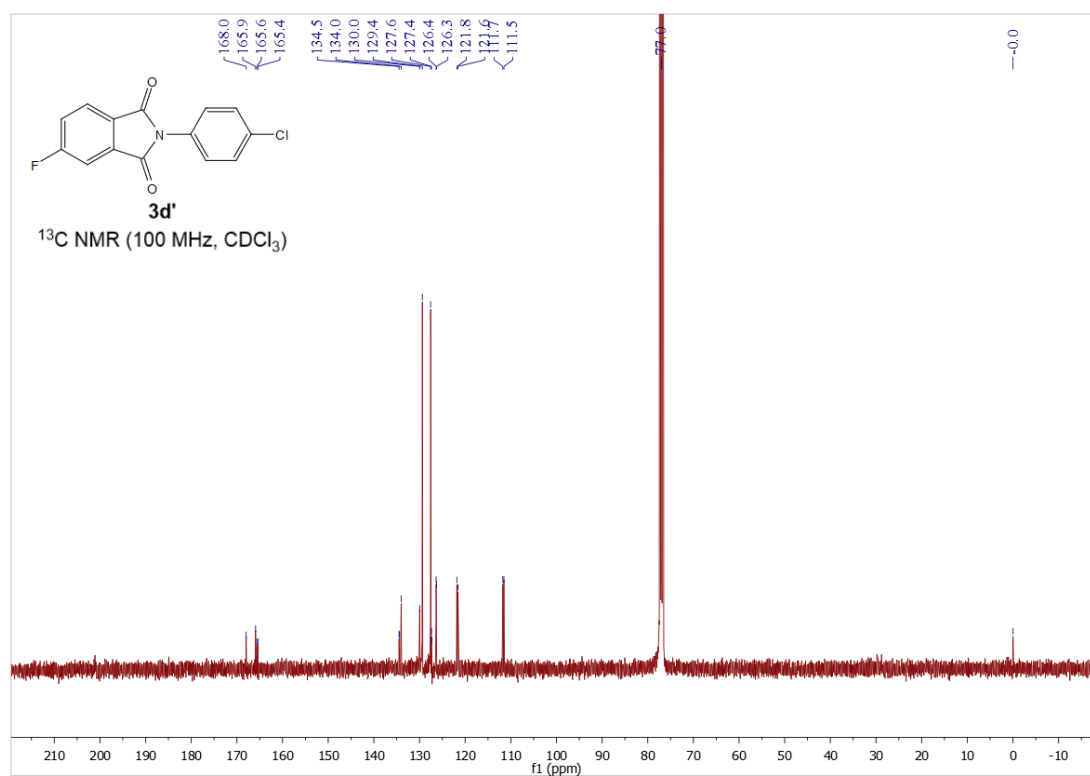

$^{19}\text{F}$  NMR of Compound **3d'** (376 MHz,  $\text{CDCl}_3$ )

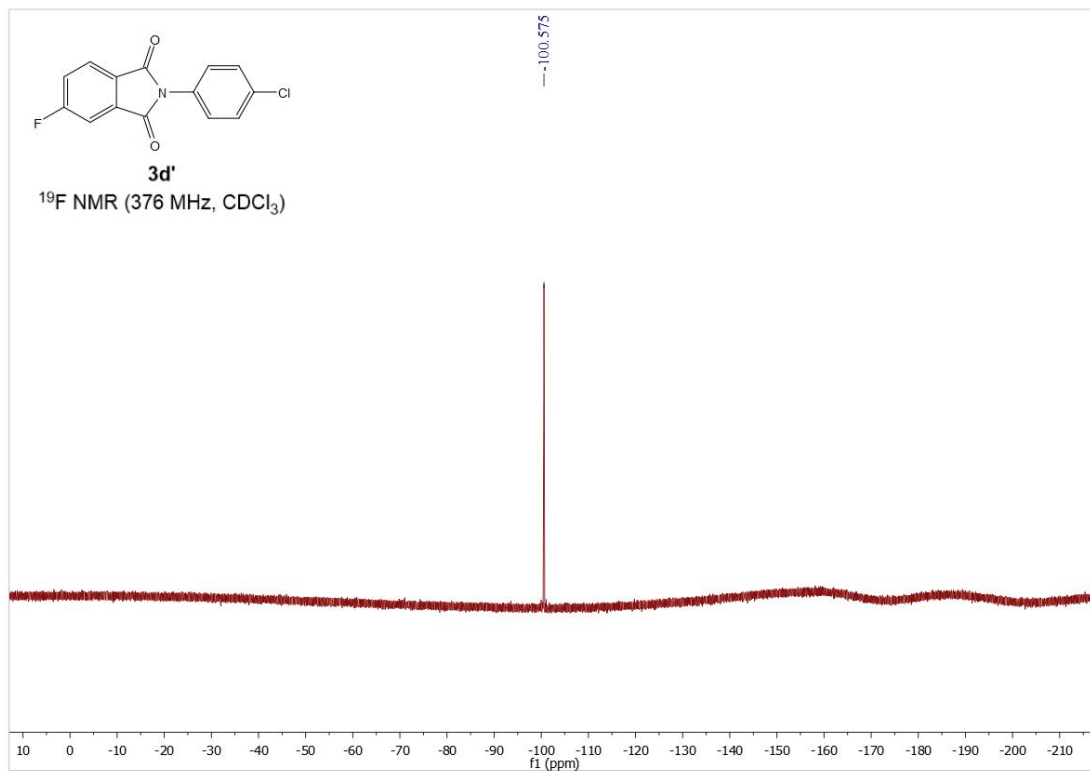

<sup>1</sup>H NMR of Compound **3e'** (400 MHz, CDCl<sub>3</sub>)

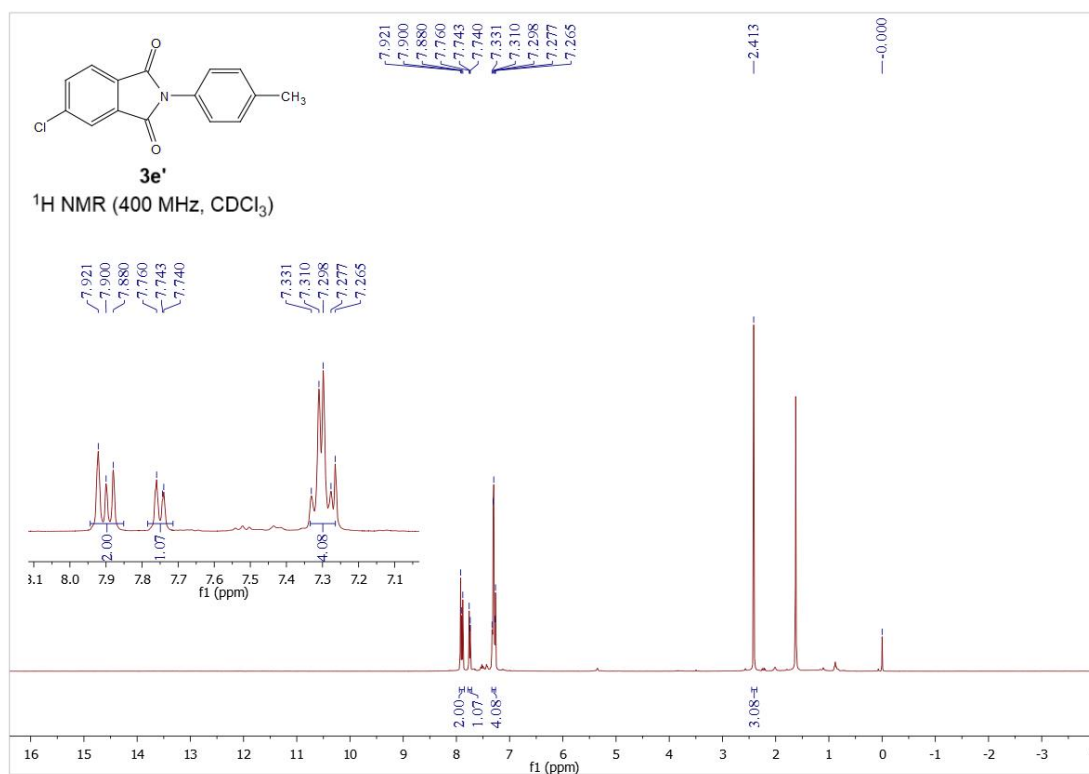

<sup>13</sup>C NMR of Compound **3e'** (100 MHz, CDCl<sub>3</sub>)

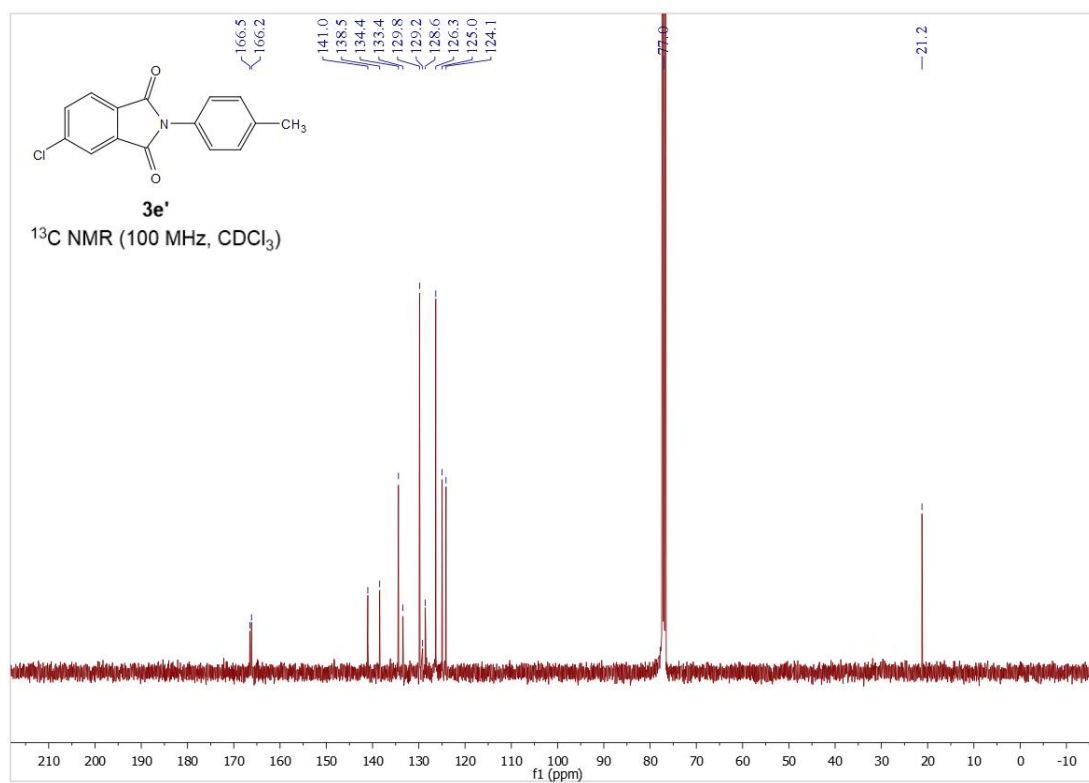

<sup>1</sup>H NMR of Compound **3f'** (400 MHz, CDCl<sub>3</sub>)

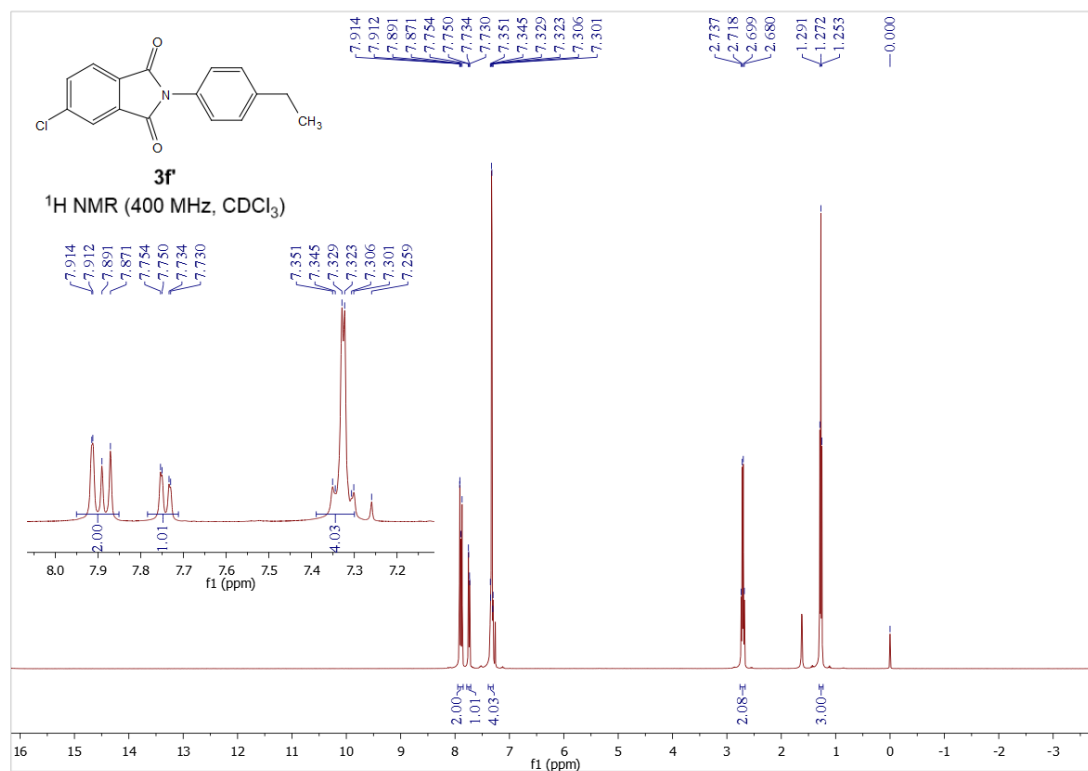

<sup>13</sup>C NMR of Compound **3f'** (100 MHz, CDCl<sub>3</sub>)

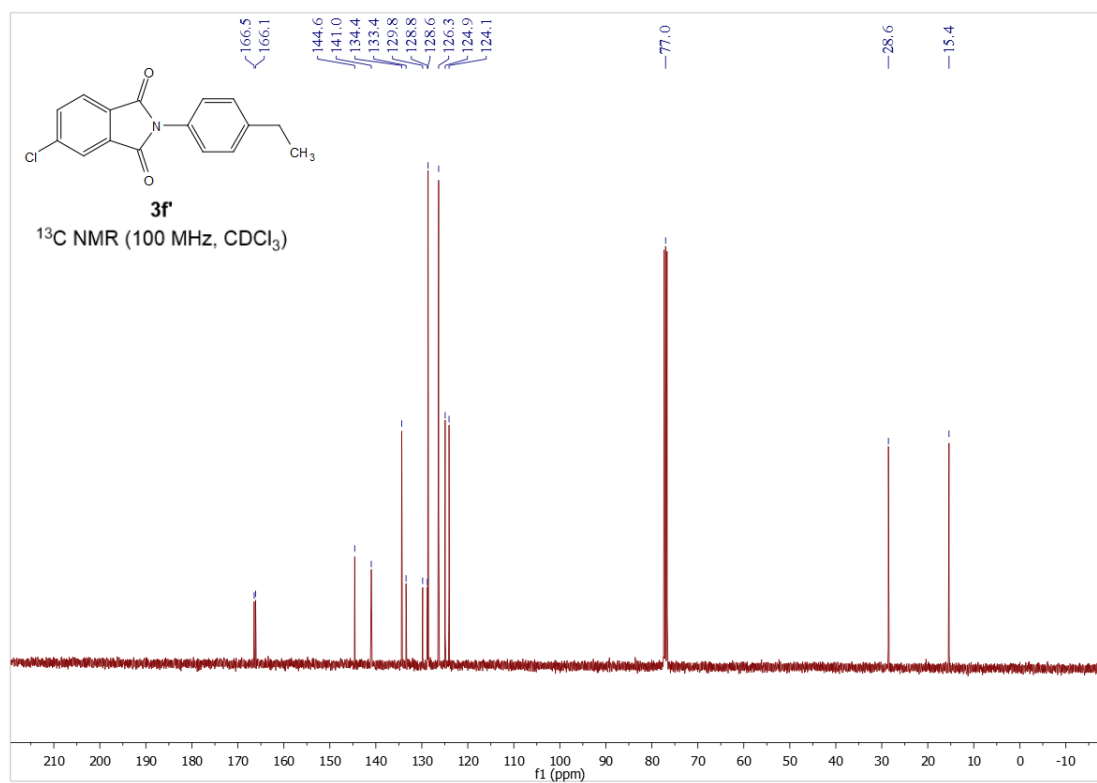



<sup>1</sup>H NMR of Compound **3g'** (400 MHz, CDCl<sub>3</sub>)

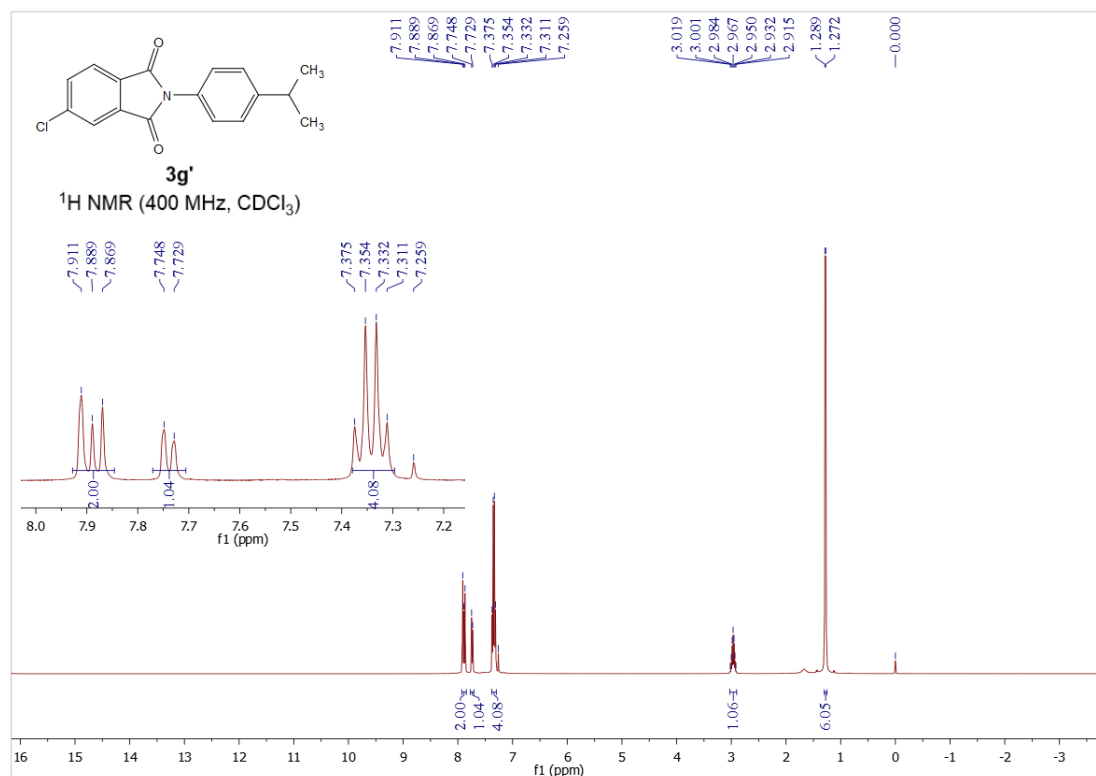

<sup>13</sup>C NMR of Compound **3g'** (100 MHz, CDCl<sub>3</sub>)

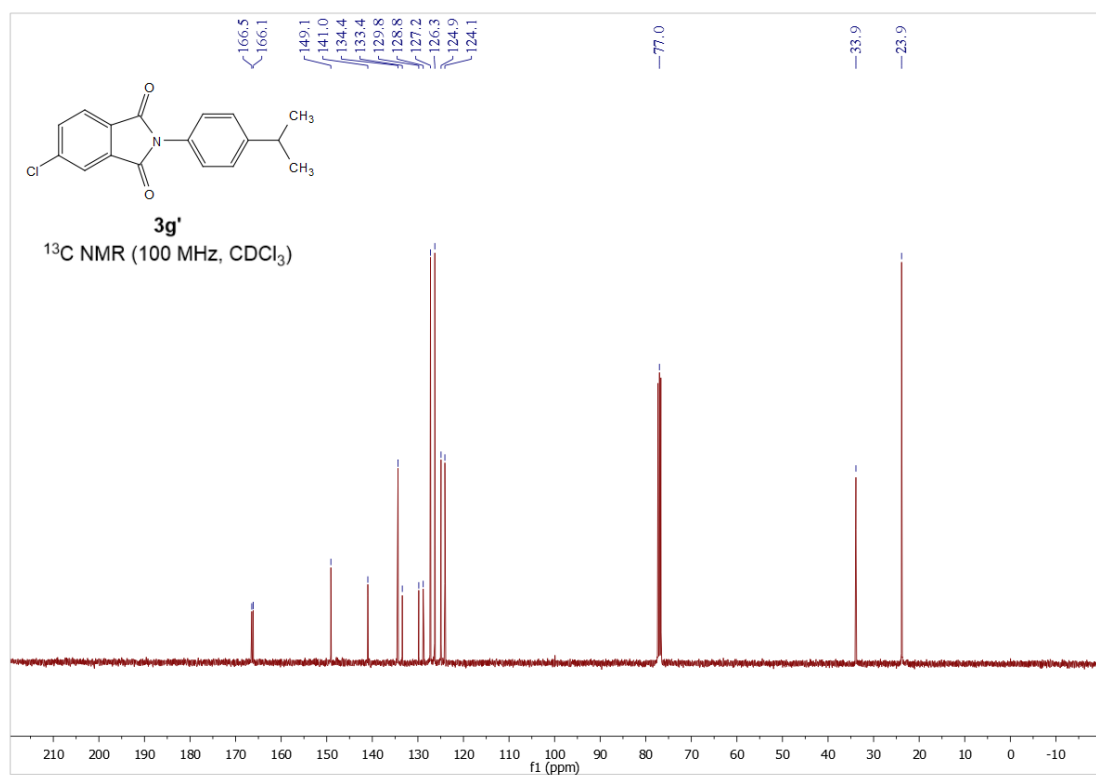

<sup>1</sup>H NMR of Compound **3h'** (400 MHz, CDCl<sub>3</sub>)

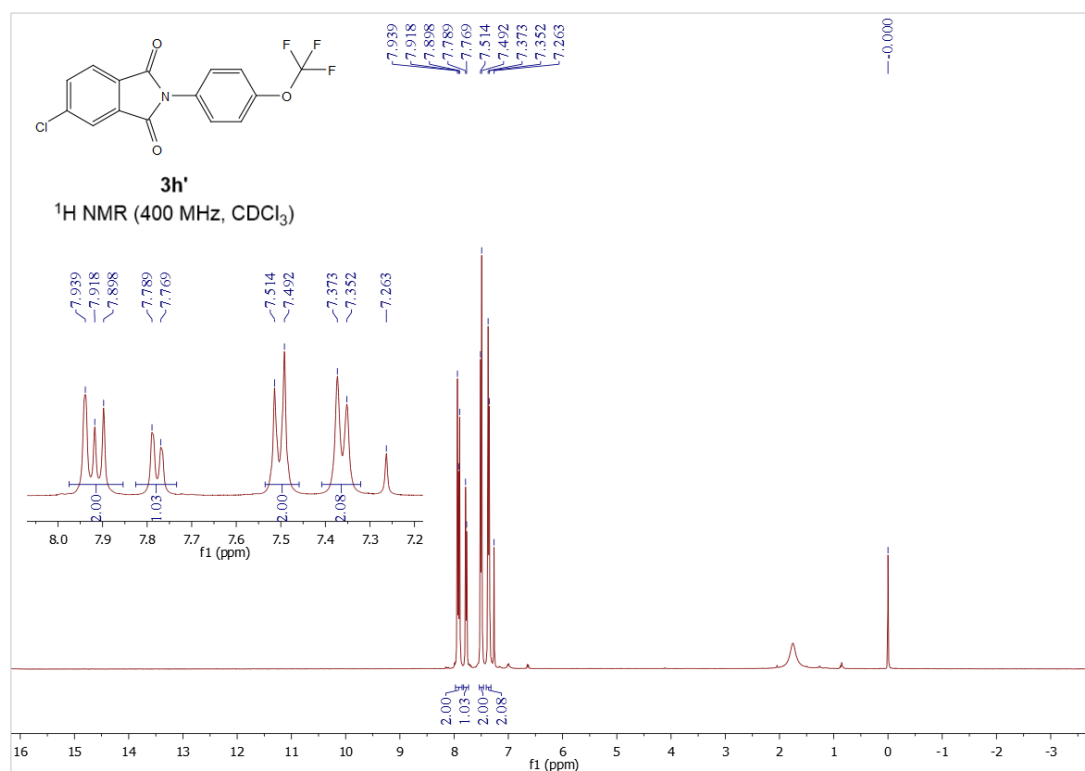

<sup>13</sup>C NMR of Compound **3h'** (100 MHz, CDCl<sub>3</sub>)

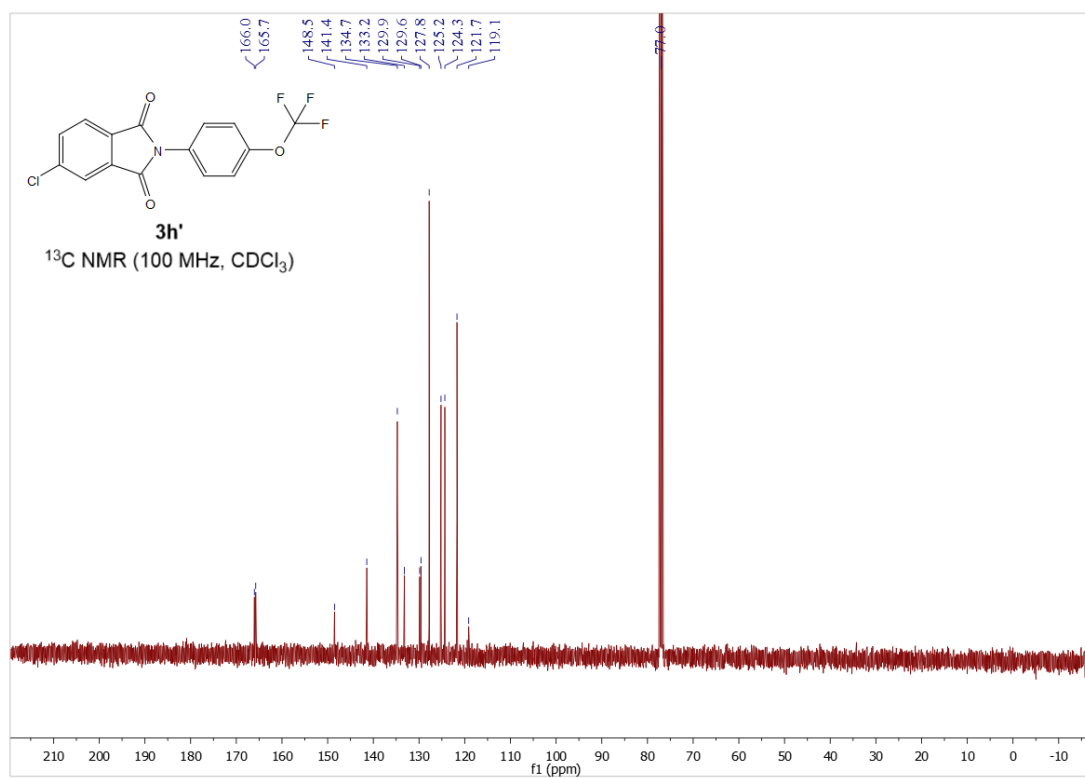

$^{19}\text{F}$  NMR of Compound **3h'** (376 MHz,  $\text{CDCl}_3$ )

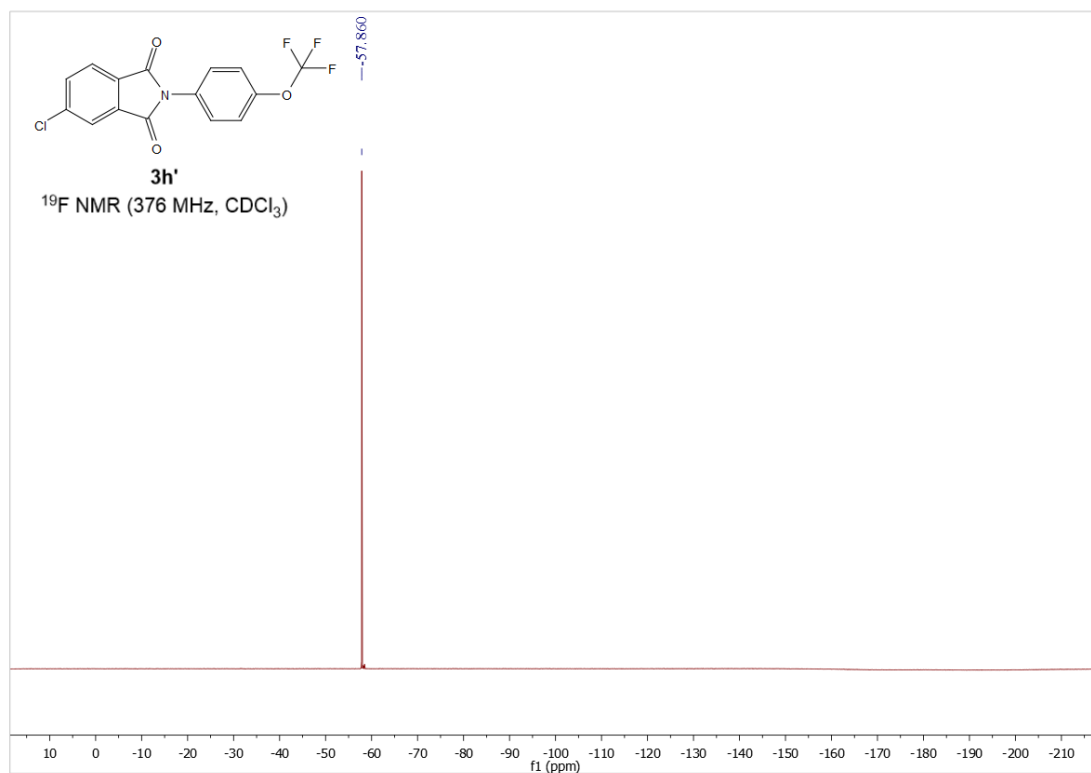

$^1\text{H}$  NMR of Compound **3i'** (400 MHz,  $\text{CDCl}_3$ )

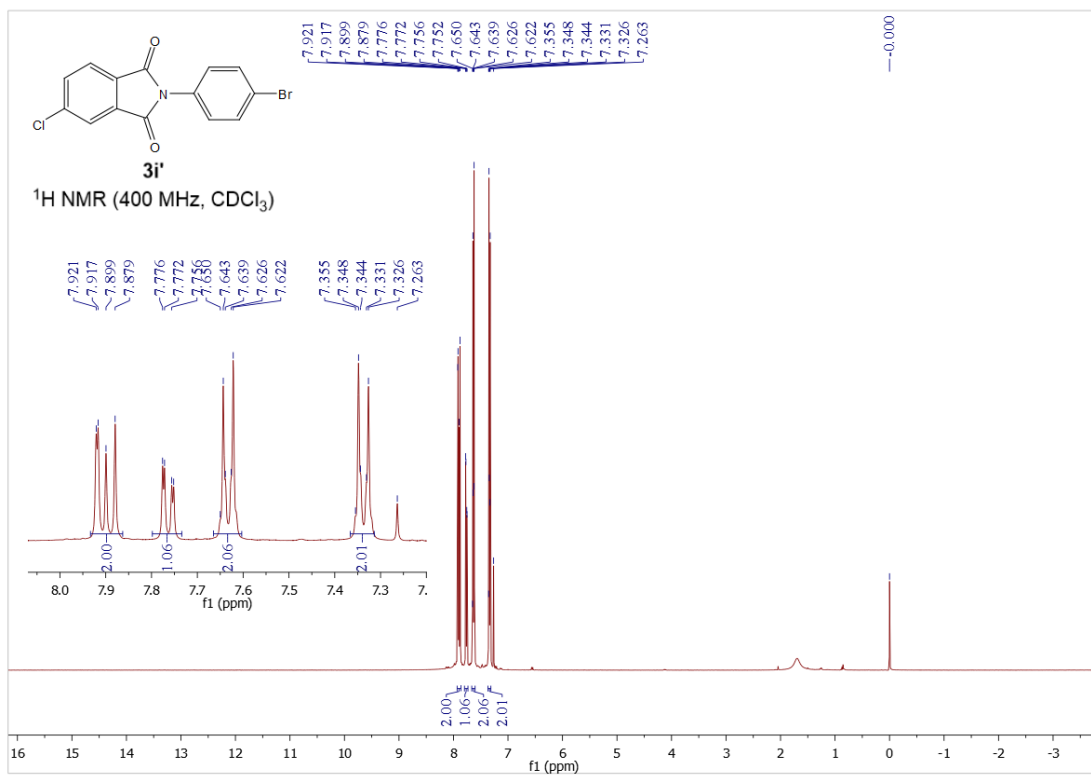

$^{13}\text{C}$  NMR of Compound **3i'** (100 MHz,  $\text{CDCl}_3$ )

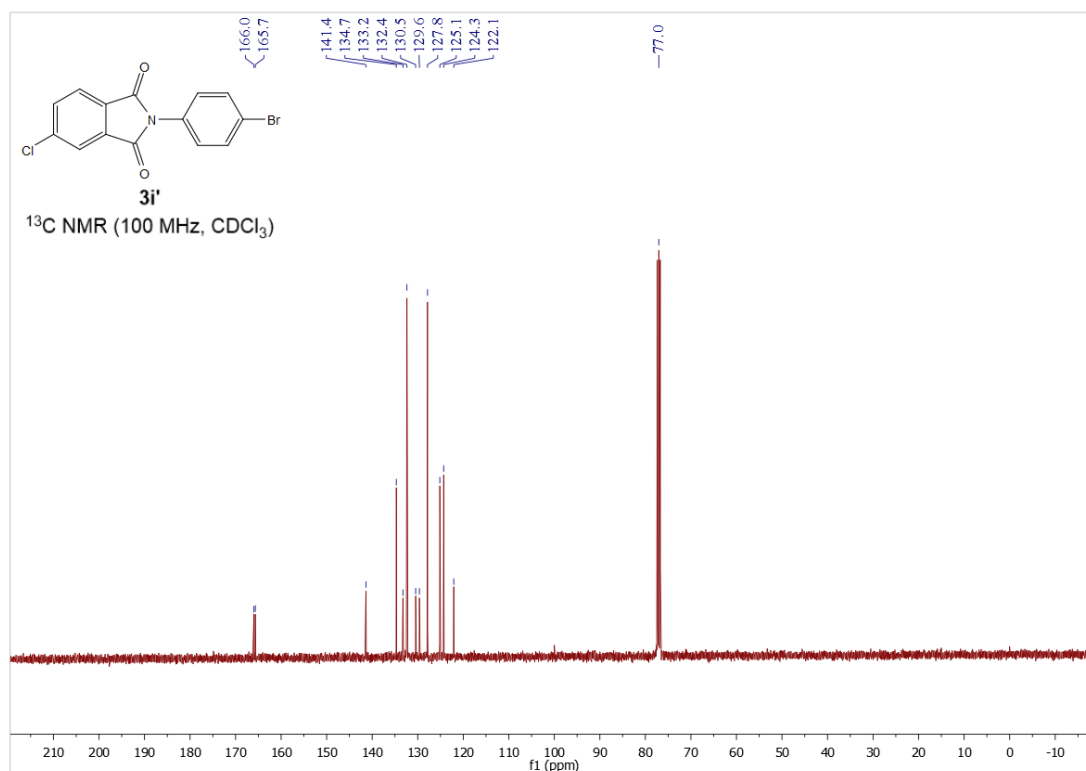

$^1\text{H}$  NMR of Compound **3j'** (400 MHz,  $\text{CDCl}_3$ )

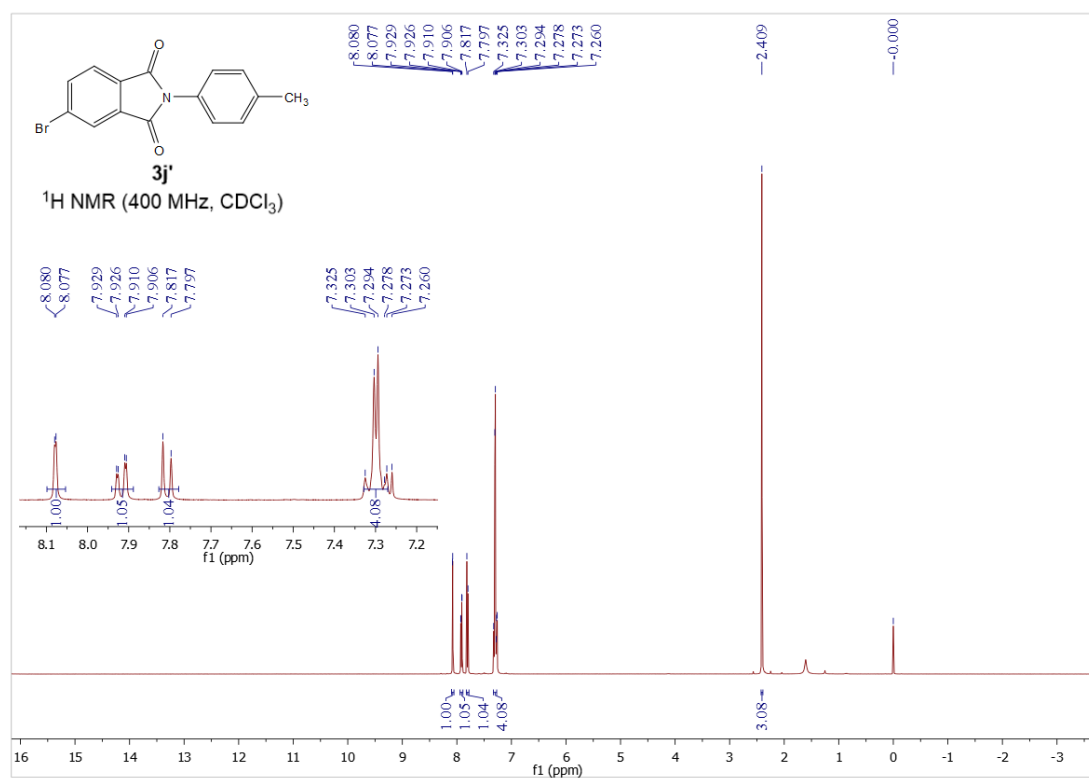

$^{13}\text{C}$  NMR of Compound **3j'** (100 MHz,  $\text{CDCl}_3$ )

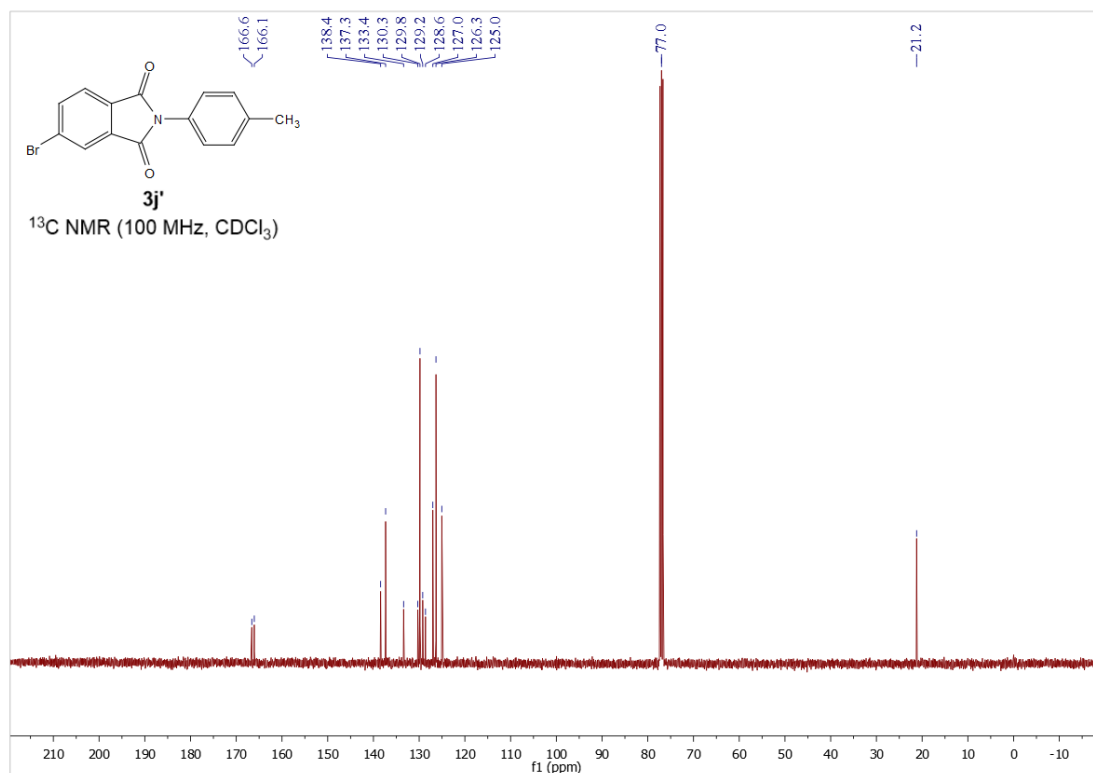

$^1\text{H}$  NMR of Compound **3k'** (400 MHz,  $\text{CDCl}_3$ )

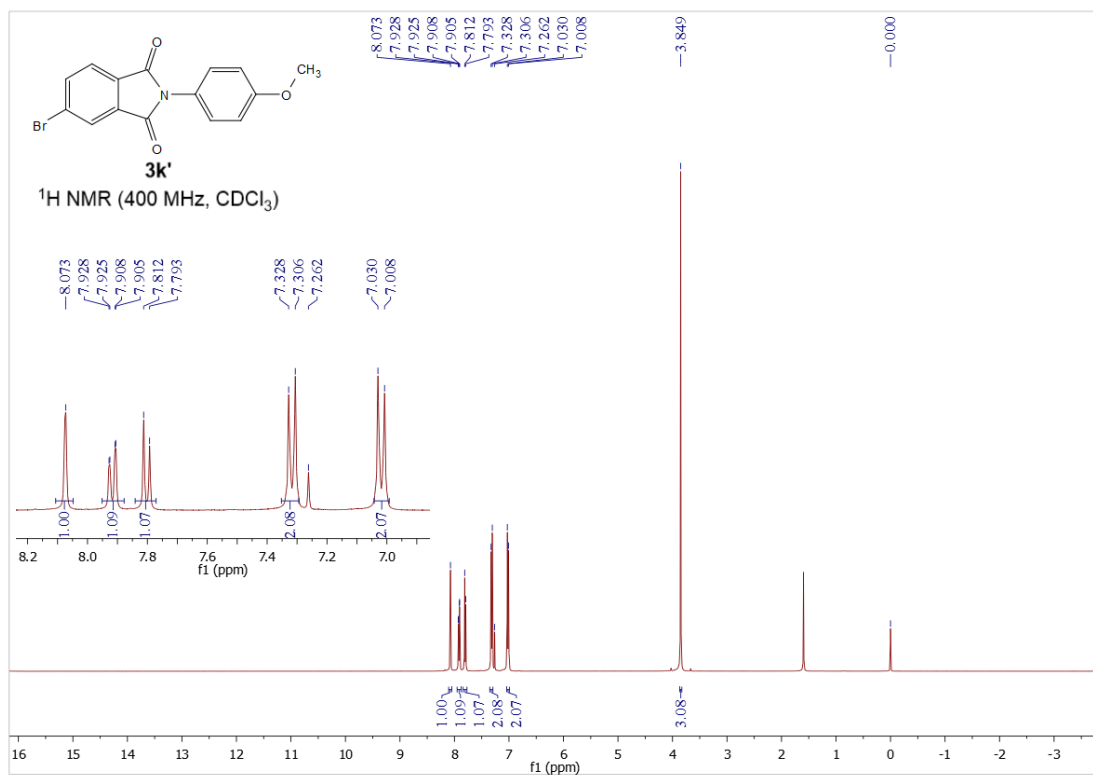

<sup>13</sup>C NMR of Compound **3k'** (100 MHz, CDCl<sub>3</sub>)

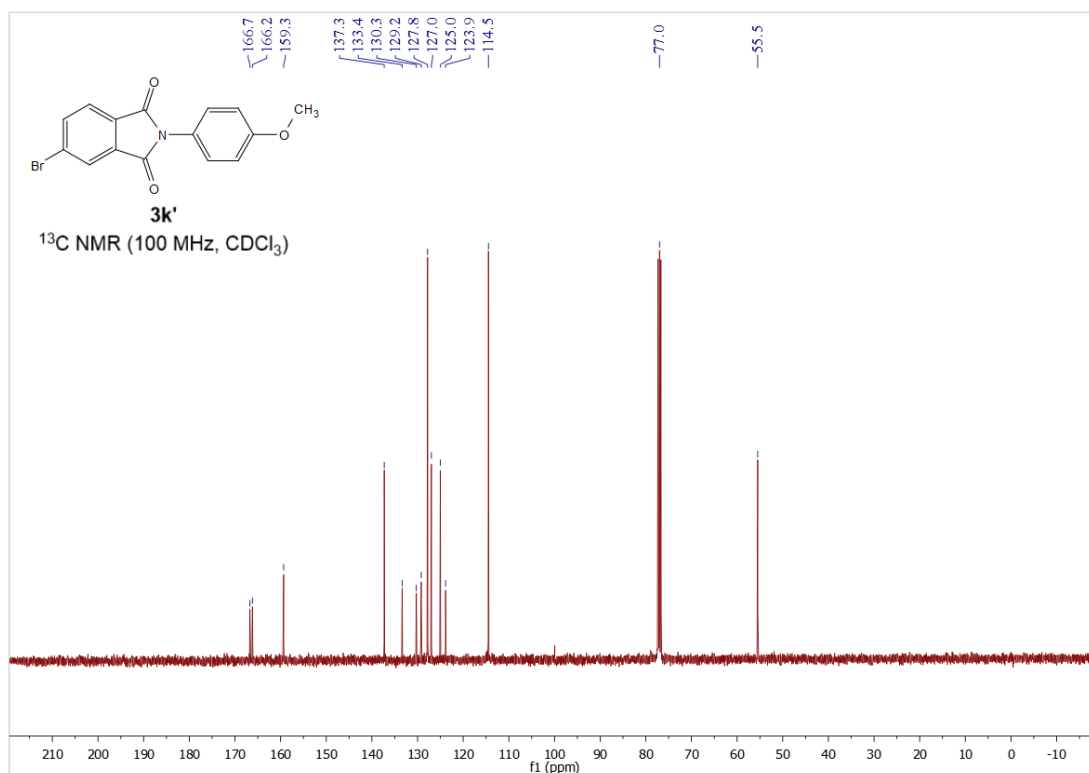

<sup>1</sup>H NMR of Compound **3l'** (400 MHz, CDCl<sub>3</sub>)

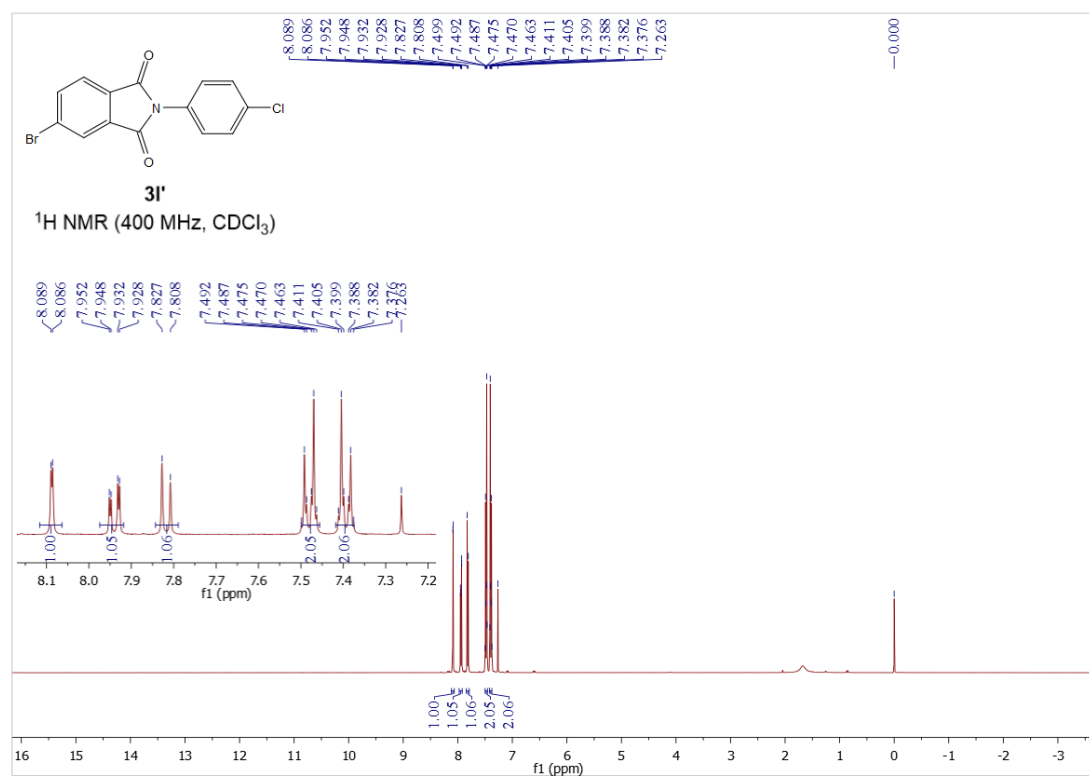



$^{13}\text{C}$  NMR of Compound **3m'** (100 MHz,  $\text{CDCl}_3$ )

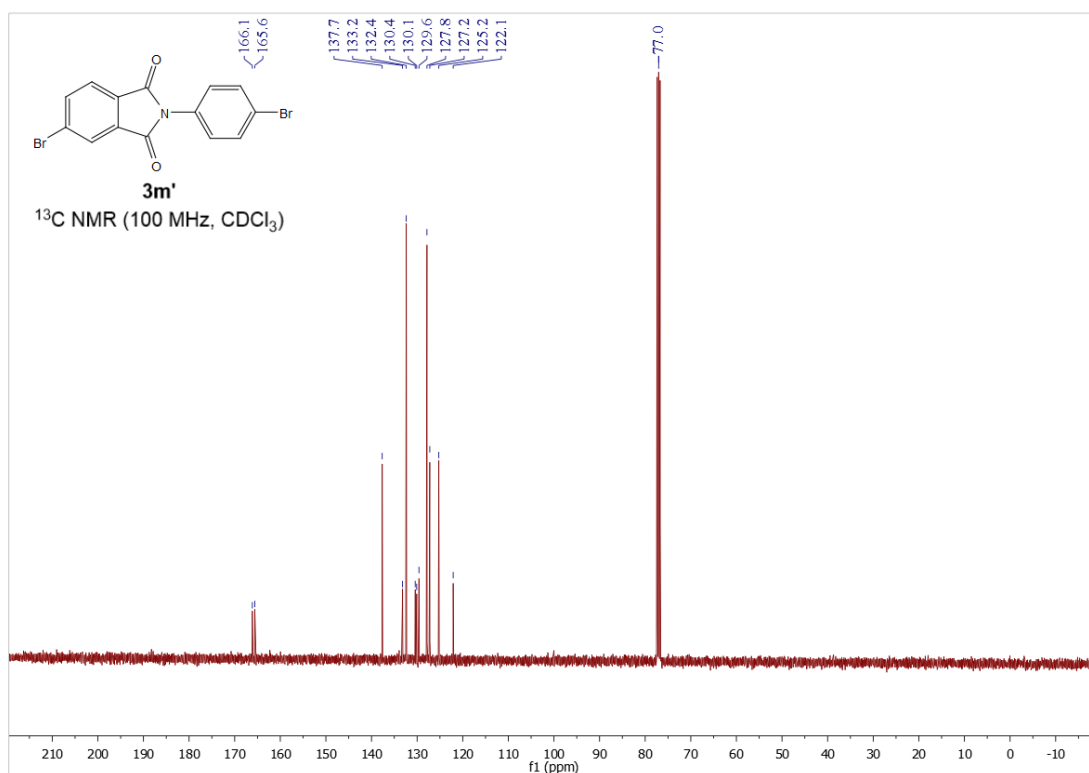

$^1\text{H}$  NMR of Compound **3n'** (400 MHz,  $\text{CDCl}_3$ )

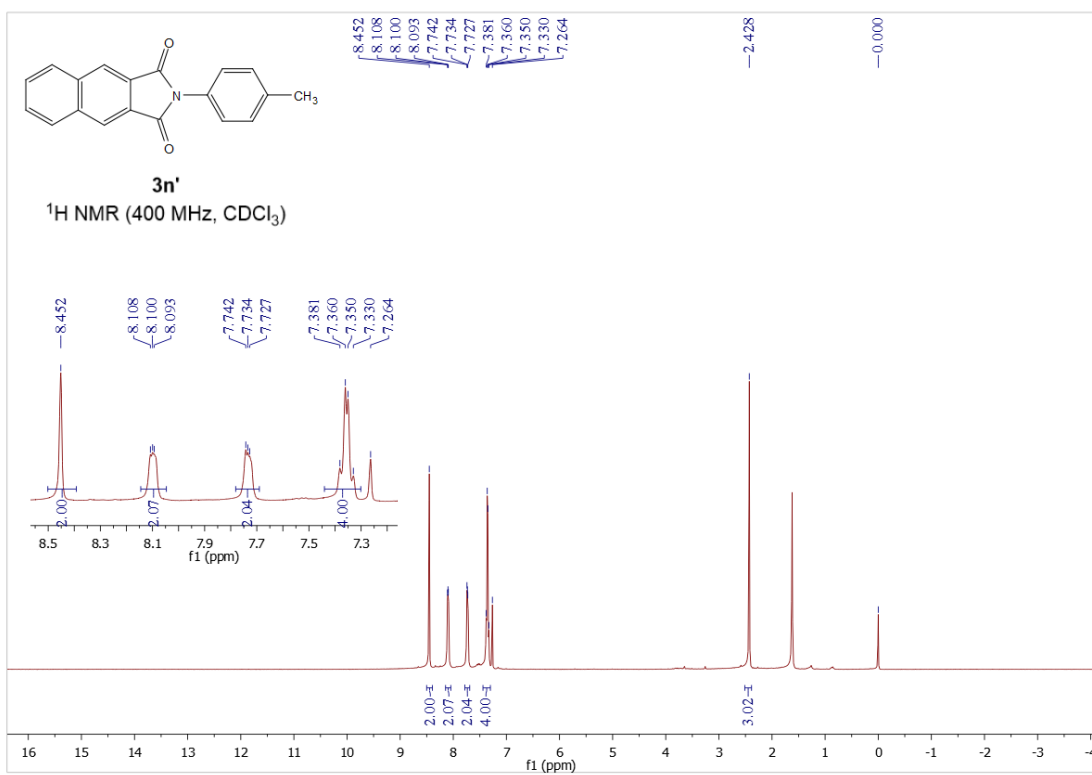



$^{13}\text{C}$  NMR of Compound **3n'** (100 MHz,  $\text{CDCl}_3$ )

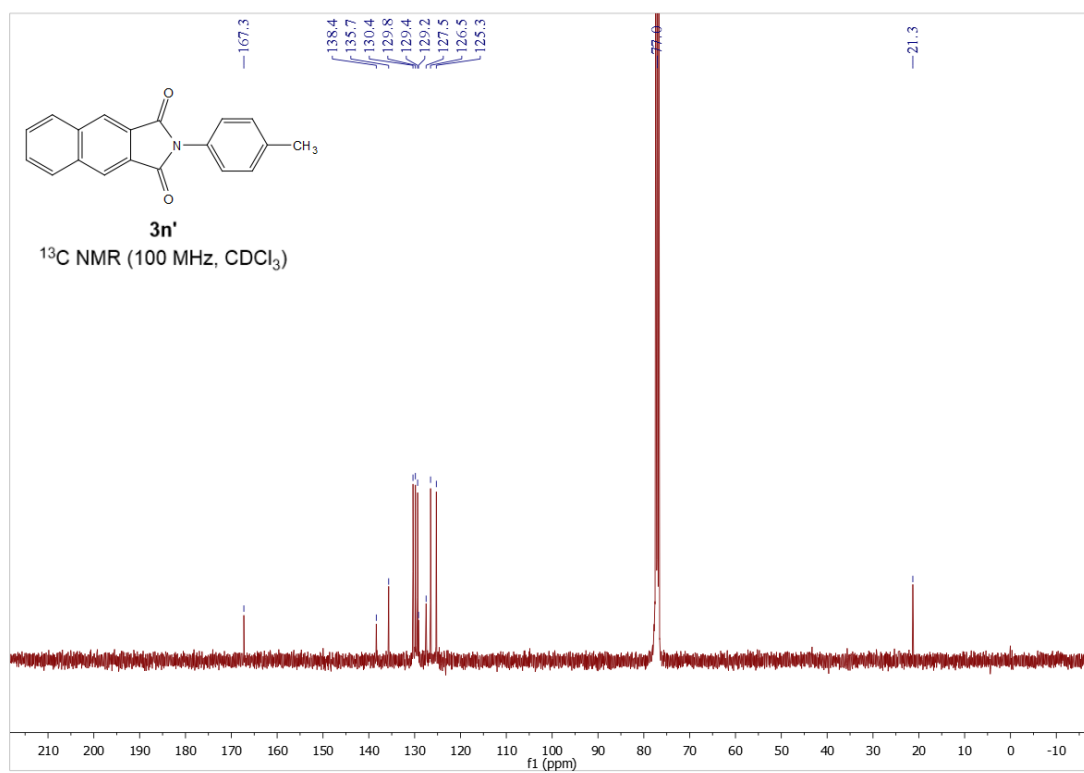

Supplement: d3qo00861d1.pdf [file d3qo00861d1.pdf]
